# Supplementary material for: Provenance of lower Palaeozoic metasediments of the East Odenwald (Mid-German-Crystalline Zone, Variscides)—a correlation with the East European Platform (Poland)
Source: Springer Nature journal article supplement (doi:10.1007/s00531-021-02103-y), 2021-09-21

| grain  | $^{207}\text{Pb}^a$<br>(cps) | $\text{U}^b$<br>(ppm) | $\text{Pb}^b$<br>(ppm) | $\text{Th}^b$<br>U | $^{206}\text{Pb}^c$<br>(%) | $\frac{^{206}\text{Pb}^d}{^{238}\text{U}}$ | $\pm 2\sigma$<br>(%) | $\frac{^{207}\text{Pb}^d}{^{235}\text{U}}$ | $\pm 2\sigma$<br>(%) | $\frac{^{207}\text{Pb}^d}{^{206}\text{Pb}}$ | $\pm 2\sigma$<br>(%) | rho <sup>e</sup> | $\frac{^{206}\text{Pb}}{^{238}\text{U}}$ | $\pm 2\sigma$<br>(Ma) | $\frac{^{207}\text{Pb}}{^{235}\text{U}}$ | $\pm 2\sigma$<br>(Ma) | $\frac{^{207}\text{Pb}}{^{206}\text{Pb}}$ | $\pm 2\sigma$<br>(Ma) | conc.<br>(%) |
|--------|------------------------------|-----------------------|------------------------|--------------------|----------------------------|--------------------------------------------|----------------------|--------------------------------------------|----------------------|---------------------------------------------|----------------------|------------------|------------------------------------------|-----------------------|------------------------------------------|-----------------------|-------------------------------------------|-----------------------|--------------|
| KB8_14 |                              |                       |                        |                    |                            |                                            |                      |                                            |                      |                                             |                      |                  |                                          |                       |                                          |                       |                                           |                       |              |
| A848   | 4376                         | 201                   | 11                     | 0.69               | 0.5                        | 0.05121                                    | 2.2                  | 0.3737                                     | 4.1                  | 0.05293                                     | 3.4                  | 0.54             | 322                                      | 7                     | 322                                      | 11                    | 326                                       | 78                    | 99           |
| A847   | 8468                         | 380                   | 22                     | 0.46               | 0.6                        | 0.05504                                    | 2.2                  | 0.4075                                     | 3.3                  | 0.05371                                     | 2.5                  | 0.66             | 345                                      | 7                     | 347                                      | 10                    | 359                                       | 56                    | 96           |
| A845   | 3681                         | 174                   | 11                     | 0.72               | 0.3                        | 0.05564                                    | 2.2                  | 0.4123                                     | 3.7                  | 0.05375                                     | 3.0                  | 0.58             | 349                                      | 7                     | 351                                      | 11                    | 360                                       | 69                    | 97           |
| A849   | 6851                         | 305                   | 19                     | 0.83               | 0.3                        | 0.05592                                    | 2.1                  | 0.4121                                     | 3.6                  | 0.05345                                     | 2.9                  | 0.59             | 351                                      | 7                     | 350                                      | 11                    | 348                                       | 65                    | 101          |
| A825   | 3398                         | 165                   | 10                     | 0.65               | 0.1                        | 0.05666                                    | 2.3                  | 0.418                                      | 3.6                  | 0.05351                                     | 2.8                  | 0.63             | 355                                      | 8                     | 355                                      | 11                    | 350                                       | 64                    | 101          |
| A844   | 3646                         | 179                   | 11                     | 0.67               | 0.4                        | 0.05688                                    | 2.1                  | 0.4218                                     | 3.8                  | 0.05379                                     | 3.1                  | 0.56             | 357                                      | 7                     | 357                                      | 11                    | 362                                       | 70                    | 98           |
| A829   | 4826                         | 204                   | 15                     | 1.13               | 0.5                        | 0.06128                                    | 2.1                  | 0.46                                       | 4.1                  | 0.05444                                     | 3.5                  | 0.52             | 383                                      | 8                     | 384                                      | 13                    | 389                                       | 79                    | 99           |
| A836   | 6405                         | 292                   | 21                     | 0.80               | 0.0                        | 0.06356                                    | 2.1                  | 0.4767                                     | 3.1                  | 0.0544                                      | 2.3                  | 0.68             | 397                                      | 8                     | 396                                      | 10                    | 388                                       | 51                    | 102          |
| A846   | 11821                        | 360                   | 30                     | 0.67               | 0.0                        | 0.07421                                    | 2.2                  | 0.5821                                     | 2.9                  | 0.05689                                     | 2.0                  | 0.74             | 461                                      | 10                    | 466                                      | 11                    | 487                                       | 44                    | 95           |
| A831   | 21136                        | 292                   | 52                     | 1.16               | 0.3                        | 0.14450                                    | 2.1                  | 1.364                                      | 2.4                  | 0.06846                                     | 1.2                  | 0.87             | 870                                      | 17                    | 873                                      | 14                    | 883                                       | 24                    | 99           |
| A827   | 6201                         | 301                   | 18                     | 0.81               | 0.0                        | 0.05018                                    | 2.1                  | 0.3787                                     | 2.9                  | 0.05474                                     | 2.0                  | 0.74             | 316                                      | 7                     | 326                                      | 8                     | 402                                       | 44                    | 79           |
| A835   | 3471                         | 152                   | 9                      | 0.54               | 0.7                        | 0.05720                                    | 2.3                  | 0.4501                                     | 3.8                  | 0.05707                                     | 3.1                  | 0.59             | 359                                      | 8                     | 377                                      | 12                    | 494                                       | 68                    | 73           |
| A826   | 4004                         | 184                   | 11                     | 0.71               | b.d.                       | 0.05042                                    | 2.1                  | 0.3978                                     | 3.4                  | 0.05722                                     | 2.6                  | 0.63             | 317                                      | 7                     | 340                                      | 10                    | 500                                       | 58                    | 63           |
| A828   | 3951                         | 174                   | 11                     | 0.67               | 0.0                        | 0.05448                                    | 2.2                  | 0.4397                                     | 4.3                  | 0.05854                                     | 3.7                  | 0.52             | 342                                      | 7                     | 370                                      | 13                    | 550                                       | 81                    | 62           |
| A837   | 4836                         | 225                   | 14                     | 0.34               | 0.3                        | 0.06165                                    | 2.3                  | 0.453                                      | 3.1                  | 0.05329                                     | 2.1                  | 0.74             | 386                                      | 9                     | 379                                      | 10                    | 341                                       | 47                    | 113          |

KB8 14

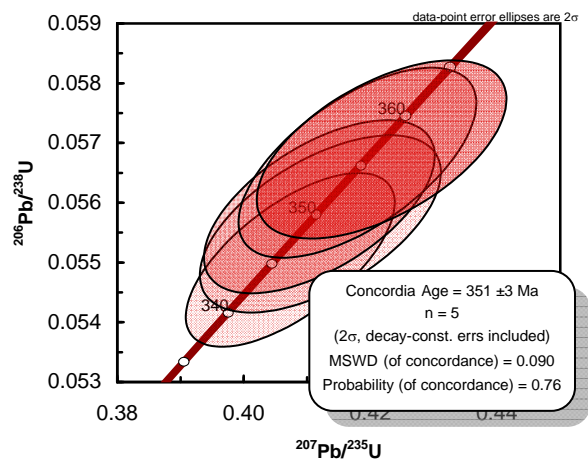

Supplement: MOESM8 [file 531_2021_2103_MOESM8_ESM.pdf]
