# Supplementary material for: Provenance of lower Palaeozoic metasediments of the East Odenwald (Mid-German-Crystalline Zone, Variscides)—a correlation with the East European Platform (Poland)
Source: Springer Nature journal article supplement (doi:10.1007/s00531-021-02103-y), 2021-09-21
Supplement: MOESM1 [file 531_2021_2103_MOESM1_ESM.pdf]

| grain       | $^{207}\text{Pb}^a$<br>(cps) | $\text{U}^b$<br>(ppm) | $\text{Pb}^b$<br>(ppm) | $\text{Th}^b$<br>U | $^{206}\text{Pb}^c$<br>(%) | $\frac{^{206}\text{Pb}^d}{^{238}\text{U}}$<br>(%) | $\pm 2\sigma$<br>(%) | $\frac{^{207}\text{Pb}^d}{^{235}\text{U}}$<br>(%) | $\pm 2\sigma$<br>(%) | $\frac{^{207}\text{Pb}^d}{^{206}\text{Pb}}$<br>(%) | $\pm 2\sigma$<br>(%) | rho <sup>e</sup> | $\frac{^{206}\text{Pb}}{^{238}\text{U}}$<br>(Ma) | $\pm 2\sigma$<br>(Ma) | $\frac{^{207}\text{Pb}}{^{235}\text{U}}$<br>(Ma) | $\pm 2\sigma$<br>(Ma) | $\frac{^{207}\text{Pb}}{^{206}\text{Pb}}$<br>(Ma) | $\pm 2\sigma$<br>(Ma) | conc.<br>(%) |
|-------------|------------------------------|-----------------------|------------------------|--------------------|----------------------------|---------------------------------------------------|----------------------|---------------------------------------------------|----------------------|----------------------------------------------------|----------------------|------------------|--------------------------------------------------|-----------------------|--------------------------------------------------|-----------------------|---------------------------------------------------|-----------------------|--------------|
| Sample 1    | Granodioritegneiss           |                       |                        |                    |                            |                                                   |                      |                                                   |                      |                                                    |                      |                  |                                                  |                       |                                                  |                       |                                                   |                       |              |
| A307        | 52855                        | 992                   | 47                     | 2.96               | 5.1                        | 0.03353                                           | 3.7                  | 0.2575                                            | 8.0                  | 0.05569                                            | 7.1                  | 0.46             | 213                                              | 8                     | 233                                              | 17                    | 440                                               | 158                   | 48           |
| A261        | 50138                        | 979                   | 41                     | 0.92               | 7.1                        | 0.03407                                           | 4.2                  | 0.2601                                            | 8.1                  | 0.05536                                            | 6.8                  | 0.53             | 216                                              | 9                     | 235                                              | 17                    | 427                                               | 153                   | 51           |
| A247        | 67457                        | 1342                  | 58                     | 1.78               | 6.5                        | 0.03452                                           | 2.2                  | 0.2626                                            | 7.3                  | 0.05518                                            | 7.0                  | 0.30             | 219                                              | 5                     | 237                                              | 16                    | 419                                               | 156                   | 52           |
| A296        | 38193                        | 744                   | 38                     | 3.20               | 6.4                        | 0.03556                                           | 2.2                  | 0.2707                                            | 5.2                  | 0.05521                                            | 4.7                  | 0.42             | 225                                              | 5                     | 243                                              | 11                    | 421                                               | 105                   | 54           |
| A294        | 28058                        | 350                   | 22                     | 1.90               | 6.1                        | 0.04355                                           | 3.3                  | 0.3314                                            | 8.8                  | 0.0552                                             | 8.1                  | 0.38             | 275                                              | 9                     | 291                                              | 22                    | 420                                               | 182                   | 65           |
| A290        | 29044                        | 527                   | 30                     | 1.69               | 2.6                        | 0.04462                                           | 2.4                  | 0.3406                                            | 6.2                  | 0.05537                                            | 5.7                  | 0.39             | 281                                              | 7                     | 298                                              | 16                    | 427                                               | 128                   | 66           |
| A233        | 33401                        | 551                   | 31                     | 0.98               | 2.8                        | 0.04570                                           | 2.9                  | 0.3473                                            | 8.6                  | 0.05512                                            | 8.1                  | 0.34             | 288                                              | 8                     | 303                                              | 23                    | 417                                               | 180                   | 69           |
| A301        | 12497                        | 273                   | 14                     | 0.51               | 0.4                        | 0.04748                                           | 2.1                  | 0.3616                                            | 3.5                  | 0.05523                                            | 2.8                  | 0.61             | 299                                              | 6                     | 313                                              | 9                     | 422                                               | 61                    | 71           |
| A275        | 57877                        | 1014                  | 62                     | 1.71               | 2.7                        | 0.04829                                           | 2.2                  | 0.3677                                            | 5.0                  | 0.05522                                            | 4.5                  | 0.43             | 304                                              | 6                     | 318                                              | 14                    | 421                                               | 101                   | 72           |
| A271        | 28120                        | 449                   | 29                     | 2.34               | 2.8                        | 0.04912                                           | 2.6                  | 0.3723                                            | 4.2                  | 0.05497                                            | 3.3                  | 0.62             | 309                                              | 8                     | 321                                              | 12                    | 411                                               | 75                    | 75           |
| A308        | 24945                        | 365                   | 24                     | 3.05               | 2.6                        | 0.05068                                           | 2.9                  | 0.387                                             | 4.0                  | 0.05539                                            | 2.8                  | 0.72             | 319                                              | 9                     | 332                                              | 11                    | 428                                               | 62                    | 74           |
| A312        | 25942                        | 441                   | 28                     | 2.34               | 2.2                        | 0.05289                                           | 3.2                  | 0.4031                                            | 4.5                  | 0.05528                                            | 3.1                  | 0.72             | 332                                              | 10                    | 344                                              | 13                    | 424                                               | 70                    | 78           |
| A270        | 30982                        | 500                   | 33                     | 1.44               | 1.7                        | 0.05448                                           | 2.0                  | 0.4146                                            | 3.5                  | 0.05519                                            | 2.9                  | 0.57             | 342                                              | 7                     | 352                                              | 10                    | 420                                               | 64                    | 81           |
| A246        | 34332                        | 679                   | 44                     | 1.60               | 1.5                        | 0.05662                                           | 2.0                  | 0.4296                                            | 6.3                  | 0.05502                                            | 6.0                  | 0.32             | 355                                              | 7                     | 363                                              | 20                    | 413                                               | 134                   | 86           |
| A264        | 26189                        | 443                   | 31                     | 1.28               | 1.6                        | 0.05720                                           | 1.9                  | 0.4374                                            | 3.0                  | 0.05546                                            | 2.3                  | 0.64             | 359                                              | 7                     | 368                                              | 9                     | 431                                               | 51                    | 83           |
| A226        | 27123                        | 497                   | 33                     | 1.27               | 1.0                        | 0.05724                                           | 2.0                  | 0.4344                                            | 2.6                  | 0.05505                                            | 1.8                  | 0.74             | 359                                              | 7                     | 366                                              | 8                     | 414                                               | 40                    | 87           |
| A309        | 18290                        | 366                   | 25                     | 1.06               | 0.7                        | 0.05823                                           | 2.3                  | 0.4419                                            | 2.8                  | 0.05504                                            | 1.6                  | 0.82             | 365                                              | 8                     | 372                                              | 9                     | 414                                               | 35                    | 88           |
| A280        | 22387                        | 435                   | 31                     | 1.01               | 0.8                        | 0.06145                                           | 1.8                  | 0.47                                              | 2.3                  | 0.05547                                            | 1.5                  | 0.77             | 384                                              | 7                     | 391                                              | 8                     | 431                                               | 33                    | 89           |
| A227        | 25556                        | 449                   | 33                     | 1.33               | 1.1                        | 0.06256                                           | 2.0                  | 0.4821                                            | 2.7                  | 0.0559                                             | 1.8                  | 0.75             | 391                                              | 8                     | 400                                              | 9                     | 448                                               | 40                    | 87           |
| <b>A253</b> | <b>21306</b>                 | <b>352</b>            | <b>26</b>              | <b>2.72</b>        | <b>2.5</b>                 | <b>0.06247</b>                                    | <b>2.0</b>           | <b>0.4734</b>                                     | <b>5.3</b>           | <b>0.05497</b>                                     | <b>4.9</b>           | <b>0.37</b>      | <b>391</b>                                       | <b>7</b>              | <b>394</b>                                       | <b>17</b>             | <b>411</b>                                        | <b>110</b>            | <b>95</b>    |
| A277        | 20821                        | 390                   | 26                     | 0.61               | 0.4                        | 0.06257                                           | 1.9                  | 0.4785                                            | 2.6                  | 0.05546                                            | 1.7                  | 0.74             | 391                                              | 7                     | 397                                              | 8                     | 431                                               | 38                    | 91           |
| A316        | 20991                        | 351                   | 26                     | 1.40               | 0.4                        | 0.06379                                           | 2.0                  | 0.4887                                            | 2.3                  | 0.05556                                            | 1.3                  | 0.84             | 399                                              | 8                     | 404                                              | 8                     | 435                                               | 29                    | 92           |
| A258        | 16911                        | 314                   | 24                     | 1.34               | 1.0                        | 0.06394                                           | 1.9                  | 0.489                                             | 4.1                  | 0.05545                                            | 3.6                  | 0.47             | 400                                              | 7                     | 404                                              | 14                    | 431                                               | 81                    | 93           |
| A302        | 11319                        | 202                   | 14                     | 0.64               | 0.1                        | 0.06428                                           | 1.9                  | 0.4925                                            | 2.6                  | 0.05557                                            | 1.7                  | 0.76             | 402                                              | 8                     | 407                                              | 9                     | 435                                               | 37                    | 92           |
| A288        | 18935                        | 343                   | 26                     | 1.12               | 0.6                        | 0.06435                                           | 2.0                  | 0.4957                                            | 2.5                  | 0.05587                                            | 1.6                  | 0.78             | 402                                              | 8                     | 409                                              | 8                     | 447                                               | 35                    | 90           |
| A293        | 20557                        | 385                   | 31                     | 1.46               | 0.4                        | 0.06482                                           | 1.9                  | 0.495                                             | 4.8                  | 0.05538                                            | 4.4                  | 0.39             | 405                                              | 7                     | 408                                              | 16                    | 427                                               | 98                    | 95           |
| A254        | 12263                        | 247                   | 16                     | 0.27               | 0.2                        | 0.06560                                           | 1.9                  | 0.4996                                            | 3.1                  | 0.05523                                            | 2.4                  | 0.61             | 410                                              | 7                     | 411                                              | 10                    | 421                                               | 54                    | 97           |
| A225        | 29660                        | 532                   | 45                     | 1.69               | 1.3                        | 0.06600                                           | 2.2                  | 0.4995                                            | 6.2                  | 0.05489                                            | 5.8                  | 0.35             | 412                                              | 9                     | 411                                              | 21                    | 408                                               | 130                   | 101          |
| A298        | 17127                        | 331                   | 25                     | 0.79               | 0.2                        | 0.06633                                           | 1.9                  | 0.5091                                            | 6.0                  | 0.05567                                            | 5.7                  | 0.32             | 414                                              | 8                     | 418                                              | 21                    | 439                                               | 126                   | 94           |
| A230        | 14792                        | 261                   | 20                     | 0.96               | 0.0                        | 0.06637                                           | 1.8                  | 0.5093                                            | 2.2                  | 0.05565                                            | 1.2                  | 0.84             | 414                                              | 7                     | 418                                              | 7                     | 439                                               | 26                    | 94           |
| A300        | 8880                         | 155                   | 11                     | 0.52               | 0.3                        | 0.06688                                           | 1.9                  | 0.5104                                            | 2.4                  | 0.05536                                            | 1.4                  | 0.80             | 417                                              | 8                     | 419                                              | 8                     | 427                                               | 32                    | 98           |
| A306        | 10377                        | 193                   | 14                     | 0.96               | 0.6                        | 0.06728                                           | 2.1                  | 0.5192                                            | 4.7                  | 0.05597                                            | 4.2                  | 0.45             | 420                                              | 9                     | 425                                              | 17                    | 451                                               | 94                    | 93           |

|      |       |     |    |      |     |         |     |           |     |         |     |      |      |    |      |    |      |     |     |
|------|-------|-----|----|------|-----|---------|-----|-----------|-----|---------|-----|------|------|----|------|----|------|-----|-----|
| A291 | 14417 | 275 | 21 | 0.89 | 0.2 | 0.06765 | 2.0 | 0.5163    | 6.1 | 0.05536 | 5.7 | 0.32 | 422  | 8  | 423  | 21 | 427  | 128 | 99  |
| A255 | 16616 | 340 | 26 | 0.83 | 0.1 | 0.06765 | 1.8 | 0.5163    | 2.2 | 0.05534 | 1.3 | 0.82 | 422  | 7  | 423  | 8  | 426  | 28  | 99  |
| A295 | 9786  | 199 | 16 | 1.12 | 0.0 | 0.06775 | 1.8 | 0.5184    | 2.3 | 0.05549 | 1.4 | 0.81 | 423  | 8  | 424  | 8  | 432  | 30  | 98  |
| A262 | 20566 | 410 | 32 | 0.93 | 0.0 | 0.06794 | 1.8 | 0.5191    | 2.1 | 0.05542 | 0.9 | 0.90 | 424  | 8  | 425  | 7  | 429  | 20  | 99  |
| A292 | 13952 | 277 | 21 | 0.83 | 0.1 | 0.06797 | 1.8 | 0.5182    | 2.2 | 0.05528 | 1.3 | 0.81 | 424  | 7  | 424  | 8  | 424  | 29  | 100 |
| A263 | 32624 | 884 | 67 | 2.54 | 1.5 | 0.06810 | 2.3 | 0.52      | 6.7 | 0.05538 | 6.2 | 0.35 | 425  | 9  | 425  | 23 | 428  | 139 | 99  |
| A244 | 7585  | 149 | 11 | 0.46 | 0.1 | 0.06810 | 1.9 | 0.5197    | 3.0 | 0.05535 | 2.3 | 0.64 | 425  | 8  | 425  | 11 | 426  | 52  | 100 |
| A234 | 18858 | 394 | 30 | 0.78 | 0.2 | 0.06811 | 1.8 | 0.5181    | 2.1 | 0.05517 | 1.1 | 0.85 | 425  | 7  | 424  | 7  | 419  | 25  | 101 |
| A281 | 17983 | 344 | 25 | 0.66 | 0.2 | 0.06816 | 1.9 | 0.5202    | 2.3 | 0.05535 | 1.4 | 0.79 | 425  | 8  | 425  | 8  | 427  | 32  | 100 |
| A245 | 10652 | 239 | 17 | 0.56 | 0.0 | 0.06817 | 2.1 | 0.5242    | 2.8 | 0.05577 | 1.9 | 0.75 | 425  | 9  | 428  | 10 | 443  | 41  | 96  |
| A279 | 13763 | 253 | 20 | 0.92 | 0.6 | 0.06822 | 1.9 | 0.5205    | 3.3 | 0.05534 | 2.7 | 0.58 | 425  | 8  | 426  | 12 | 426  | 60  | 100 |
| A315 | 9262  | 167 | 15 | 1.68 | 0.3 | 0.06822 | 2.0 | 0.5213    | 3.3 | 0.05542 | 2.6 | 0.60 | 425  | 8  | 426  | 11 | 429  | 58  | 99  |
| A278 | 11097 | 207 | 19 | 1.71 | 1.4 | 0.06825 | 1.9 | 0.5207    | 3.2 | 0.05534 | 2.6 | 0.59 | 426  | 8  | 426  | 11 | 426  | 57  | 100 |
| A256 | 27666 | 573 | 54 | 1.85 | 0.1 | 0.06830 | 1.9 | 0.5213    | 2.2 | 0.05535 | 1.3 | 0.83 | 426  | 8  | 426  | 8  | 427  | 28  | 100 |
| A228 | 27644 | 430 | 33 | 1.41 | 3.7 | 0.06837 | 2.1 | 0.522     | 9.7 | 0.05538 | 9.5 | 0.22 | 426  | 9  | 427  | 35 | 427  | 212 | 100 |
| A257 | 18681 | 369 | 29 | 0.87 | 0.9 | 0.06837 | 1.8 | 0.5216    | 2.6 | 0.05533 | 1.9 | 0.70 | 426  | 8  | 426  | 9  | 426  | 41  | 100 |
| A235 | 15086 | 299 | 23 | 0.81 | 0.7 | 0.06845 | 1.8 | 0.5233    | 2.7 | 0.05544 | 2.0 | 0.68 | 427  | 8  | 427  | 9  | 430  | 44  | 99  |
| A299 | 8038  | 155 | 12 | 0.84 | 0.4 | 0.06857 | 1.8 | 0.5222    | 3.2 | 0.05523 | 2.6 | 0.58 | 428  | 8  | 427  | 11 | 421  | 58  | 101 |
| A248 | 14177 | 278 | 21 | 0.75 | 0.2 | 0.06924 | 1.8 | 0.5267    | 2.6 | 0.05517 | 1.9 | 0.69 | 432  | 8  | 430  | 9  | 419  | 42  | 103 |
| A259 | 4973  | 66  | 8  | 1.23 | 0.6 | 0.09737 | 1.8 | 0.8041135 | 2.5 | 0.0599  | 1.8 | 0.71 | 599  | 10 | 599  | 12 | 600  | 39  | 100 |
| A265 | 37697 | 82  | 30 | 0.57 | 0.5 | 0.32990 | 1.8 | 4.972     | 2.1 | 0.1093  | 1.1 | 0.86 | 1838 | 29 | 1815 | 18 | 1788 | 20  | 103 |
