# Supplementary material for: Provenance of lower Palaeozoic metasediments of the East Odenwald (Mid-German-Crystalline Zone, Variscides)—a correlation with the East European Platform (Poland)
Source: Springer Nature journal article supplement (doi:10.1007/s00531-021-02103-y), 2021-09-21
Supplement: MOESM1 [file 531_2021_2103_MOESM1_ESM.pdf]

| grain       | <sup>207</sup> Pb <sup>a</sup><br>(cps) | U <sup>b</sup><br>(ppm) | Pb <sup>b</sup><br>(ppm) | Th <sup>b</sup><br>U | <sup>206</sup> Pbc <sup>c</sup><br>(%) | <sup>206</sup> Pb <sup>d</sup><br><sup>238</sup> U | ±2σ<br>(%) | <sup>207</sup> Pb <sup>d</sup><br><sup>235</sup> U | ±2σ<br>(%) | <sup>207</sup> Pb <sup>d</sup><br><sup>206</sup> Pb | ±2σ<br>(%) | rho <sup>e</sup> | <sup>206</sup> Pb<br><sup>238</sup> U | ±2σ<br>(Ma) | <sup>207</sup> Pb<br><sup>235</sup> U | ±2σ<br>(Ma) | <sup>207</sup> Pb<br><sup>206</sup> Pb | ±2σ<br>(Ma) | conc.<br>(%) |
|-------------|-----------------------------------------|-------------------------|--------------------------|----------------------|----------------------------------------|----------------------------------------------------|------------|----------------------------------------------------|------------|-----------------------------------------------------|------------|------------------|---------------------------------------|-------------|---------------------------------------|-------------|----------------------------------------|-------------|--------------|
| Sample 1    | Granodioritegneiss                      |                         |                          |                      |                                        |                                                    |            |                                                    |            |                                                     |            |                  |                                       |             |                                       |             |                                        |             |              |
| A307        | 52855                                   | 992                     | 47                       | 2.96                 | 5.1                                    | 0.03353                                            | 3.7        | 0.2575                                             | 8.0        | 0.05569                                             | 7.1        | 0.46             | 213                                   | 8           | 233                                   | 17          | 440                                    | 158         | 48           |
| A261        | 50138                                   | 979                     | 41                       | 0.92                 | 7.1                                    | 0.03407                                            | 4.2        | 0.2601                                             | 8.1        | 0.05536                                             | 6.8        | 0.53             | 216                                   | 9           | 235                                   | 17          | 427                                    | 153         | 51           |
| A247        | 67457                                   | 1342                    | 58                       | 1.78                 | 6.5                                    | 0.03452                                            | 2.2        | 0.2626                                             | 7.3        | 0.05518                                             | 7.0        | 0.30             | 219                                   | 5           | 237                                   | 16          | 419                                    | 156         | 52           |
| A296        | 38193                                   | 744                     | 38                       | 3.20                 | 6.4                                    | 0.03556                                            | 2.2        | 0.2707                                             | 5.2        | 0.05521                                             | 4.7        | 0.42             | 225                                   | 5           | 243                                   | 11          | 421                                    | 105         | 54           |
| A294        | 28058                                   | 350                     | 22                       | 1.90                 | 6.1                                    | 0.04355                                            | 3.3        | 0.3314                                             | 8.8        | 0.0552                                              | 8.1        | 0.38             | 275                                   | 9           | 291                                   | 22          | 420                                    | 182         | 65           |
| A290        | 29044                                   | 527                     | 30                       | 1.69                 | 2.6                                    | 0.04462                                            | 2.4        | 0.3406                                             | 6.2        | 0.05537                                             | 5.7        | 0.39             | 281                                   | 7           | 298                                   | 16          | 427                                    | 128         | 66           |
| A233        | 33401                                   | 551                     | 31                       | 0.98                 | 2.8                                    | 0.04570                                            | 2.9        | 0.3473                                             | 8.6        | 0.05512                                             | 8.1        | 0.34             | 288                                   | 8           | 303                                   | 23          | 417                                    | 180         | 69           |
| A301        | 12497                                   | 273                     | 14                       | 0.51                 | 0.4                                    | 0.04748                                            | 2.1        | 0.3616                                             | 3.5        | 0.05523                                             | 2.8        | 0.61             | 299                                   | 6           | 313                                   | 9           | 422                                    | 61          | 71           |
| A275        | 57877                                   | 1014                    | 62                       | 1.71                 | 2.7                                    | 0.04829                                            | 2.2        | 0.3677                                             | 5.0        | 0.05522                                             | 4.5        | 0.43             | 304                                   | 6           | 318                                   | 14          | 421                                    | 101         | 72           |
| A271        | 28120                                   | 449                     | 29                       | 2.34                 | 2.8                                    | 0.04912                                            | 2.6        | 0.3723                                             | 4.2        | 0.05497                                             | 3.3        | 0.62             | 309                                   | 8           | 321                                   | 12          | 411                                    | 75          | 75           |
| A308        | 24945                                   | 365                     | 24                       | 3.05                 | 2.6                                    | 0.05068                                            | 2.9        | 0.387                                              | 4.0        | 0.05539                                             | 2.8        | 0.72             | 319                                   | 9           | 332                                   | 11          | 428                                    | 62          | 74           |
| A312        | 25942                                   | 441                     | 28                       | 2.34                 | 2.2                                    | 0.05289                                            | 3.2        | 0.4031                                             | 4.5        | 0.05528                                             | 3.1        | 0.72             | 332                                   | 10          | 344                                   | 13          | 424                                    | 70          | 78           |
| A270        | 30982                                   | 500                     | 33                       | 1.44                 | 1.7                                    | 0.05448                                            | 2.0        | 0.4146                                             | 3.5        | 0.05519                                             | 2.9        | 0.57             | 342                                   | 7           | 352                                   | 10          | 420                                    | 64          | 81           |
| A246        | 34332                                   | 679                     | 44                       | 1.60                 | 1.5                                    | 0.05662                                            | 2.0        | 0.4296                                             | 6.3        | 0.05502                                             | 6.0        | 0.32             | 355                                   | 7           | 363                                   | 20          | 413                                    | 134         | 86           |
| A264        | 26189                                   | 443                     | 31                       | 1.28                 | 1.6                                    | 0.05720                                            | 1.9        | 0.4374                                             | 3.0        | 0.05546                                             | 2.3        | 0.64             | 359                                   | 7           | 368                                   | 9           | 431                                    | 51          | 83           |
| A226        | 27123                                   | 497                     | 33                       | 1.27                 | 1.0                                    | 0.05724                                            | 2.0        | 0.4344                                             | 2.6        | 0.05505                                             | 1.8        | 0.74             | 359                                   | 7           | 366                                   | 8           | 414                                    | 40          | 87           |
| A309        | 18290                                   | 366                     | 25                       | 1.06                 | 0.7                                    | 0.05823                                            | 2.3        | 0.4419                                             | 2.8        | 0.05504                                             | 1.6        | 0.82             | 365                                   | 8           | 372                                   | 9           | 414                                    | 35          | 88           |
| A280        | 22387                                   | 435                     | 31                       | 1.01                 | 0.8                                    | 0.06145                                            | 1.8        | 0.47                                               | 2.3        | 0.05547                                             | 1.5        | 0.77             | 384                                   | 7           | 391                                   | 8           | 431                                    | 33          | 89           |
| A227        | 25556                                   | 449                     | 33                       | 1.33                 | 1.1                                    | 0.06256                                            | 2.0        | 0.4821                                             | 2.7        | 0.0559                                              | 1.8        | 0.75             | 391                                   | 8           | 400                                   | 9           | 448                                    | 40          | 87           |
| <b>A253</b> | <b>21306</b>                            | <b>352</b>              | <b>26</b>                | <b>2.72</b>          | <b>2.5</b>                             | <b>0.06247</b>                                     | <b>2.0</b> | <b>0.4734</b>                                      | <b>5.3</b> | <b>0.05497</b>                                      | <b>4.9</b> | <b>0.37</b>      | <b>391</b>                            | <b>7</b>    | <b>394</b>                            | <b>17</b>   | <b>411</b>                             | <b>110</b>  | <b>95</b>    |
| A277        | 20821                                   | 390                     | 26                       | 0.61                 | 0.4                                    | 0.06257                                            | 1.9        | 0.4785                                             | 2.6        | 0.05546                                             | 1.7        | 0.74             | 391                                   | 7           | 397                                   | 8           | 431                                    | 38          | 91           |
| A316        | 20991                                   | 351                     | 26                       | 1.40                 | 0.4                                    | 0.06379                                            | 2.0        | 0.4887                                             | 2.3        | 0.05556                                             | 1.3        | 0.84             | 399                                   | 8           | 404                                   | 8           | 435                                    | 29          | 92           |
| A258        | 16911                                   | 314                     | 24                       | 1.34                 | 1.0                                    | 0.06394                                            | 1.9        | 0.489                                              | 4.1        | 0.05545                                             | 3.6        | 0.47             | 400                                   | 7           | 404                                   | 14          | 431                                    | 81          | 93           |
| A302        | 11319                                   | 202                     | 14                       | 0.64                 | 0.1                                    | 0.06428                                            | 1.9        | 0.4925                                             | 2.6        | 0.05557                                             | 1.7        | 0.76             | 402                                   | 8           | 407                                   | 9           | 435                                    | 37          | 92           |
| A288        | 18935                                   | 343                     | 26                       | 1.12                 | 0.6                                    | 0.06435                                            | 2.0        | 0.4957                                             | 2.5        | 0.05587                                             | 1.6        | 0.78             | 402                                   | 8           | 409                                   | 8           | 447                                    | 35          | 90           |
| A293        | 20557                                   | 385                     | 31                       | 1.46                 | 0.4                                    | 0.06482                                            | 1.9        | 0.495                                              | 4.8        | 0.05538                                             | 4.4        | 0.39             | 405                                   | 7           | 408                                   | 16          | 427                                    | 98          | 95           |
| A254        | 12263                                   | 247                     | 16                       | 0.27                 | 0.2                                    | 0.06560                                            | 1.9        | 0.4996                                             | 3.1        | 0.05523                                             | 2.4        | 0.61             | 410                                   | 7           | 411                                   | 10          | 421                                    | 54          | 97           |
| A225        | 29660                                   | 532                     | 45                       | 1.69                 | 1.3                                    | 0.06600                                            | 2.2        | 0.4995                                             | 6.2        | 0.05489                                             | 5.8        | 0.35             | 412                                   | 9           | 411                                   | 21          | 408                                    | 130         | 101          |
| A298        | 17127                                   | 331                     | 25                       | 0.79                 | 0.2                                    | 0.06633                                            | 1.9        | 0.5091                                             | 6.0        | 0.05567                                             | 5.7        | 0.32             | 414                                   | 8           | 418                                   | 21          | 439                                    | 126         | 94           |
| A230        | 14792                                   | 261                     | 20                       | 0.96                 | 0.0                                    | 0.06637                                            | 1.8        | 0.5093                                             | 2.2        | 0.05565                                             | 1.2        | 0.84             | 414                                   | 7           | 418                                   | 7           | 439                                    | 26          | 94           |
| A300        | 8880                                    | 155                     | 11                       | 0.52                 | 0.3                                    | 0.06688                                            | 1.9        | 0.5104                                             | 2.4        | 0.05536                                             | 1.4        | 0.80             | 417                                   | 8           | 419                                   | 8           | 427                                    | 32          | 98           |
| A306        | 10377                                   | 193                     | 14                       | 0.96                 | 0.6                                    | 0.06728                                            | 2.1        | 0.5192                                             | 4.7        | 0.05597                                             | 4.2        | 0.45             | 420                                   | 9           | 425                                   | 17          | 451                                    | 94          | 93           |

|      |       |     |    |      |     |         |     |           |     |         |     |      |      |    |      |    |      |     |     |
|------|-------|-----|----|------|-----|---------|-----|-----------|-----|---------|-----|------|------|----|------|----|------|-----|-----|
| A291 | 14417 | 275 | 21 | 0.89 | 0.2 | 0.06765 | 2.0 | 0.5163    | 6.1 | 0.05536 | 5.7 | 0.32 | 422  | 8  | 423  | 21 | 427  | 128 | 99  |
| A255 | 16616 | 340 | 26 | 0.83 | 0.1 | 0.06765 | 1.8 | 0.5163    | 2.2 | 0.05534 | 1.3 | 0.82 | 422  | 7  | 423  | 8  | 426  | 28  | 99  |
| A295 | 9786  | 199 | 16 | 1.12 | 0.0 | 0.06775 | 1.8 | 0.5184    | 2.3 | 0.05549 | 1.4 | 0.81 | 423  | 8  | 424  | 8  | 432  | 30  | 98  |
| A262 | 20566 | 410 | 32 | 0.93 | 0.0 | 0.06794 | 1.8 | 0.5191    | 2.1 | 0.05542 | 0.9 | 0.90 | 424  | 8  | 425  | 7  | 429  | 20  | 99  |
| A292 | 13952 | 277 | 21 | 0.83 | 0.1 | 0.06797 | 1.8 | 0.5182    | 2.2 | 0.05528 | 1.3 | 0.81 | 424  | 7  | 424  | 8  | 424  | 29  | 100 |
| A263 | 32624 | 884 | 67 | 2.54 | 1.5 | 0.06810 | 2.3 | 0.52      | 6.7 | 0.05538 | 6.2 | 0.35 | 425  | 9  | 425  | 23 | 428  | 139 | 99  |
| A244 | 7585  | 149 | 11 | 0.46 | 0.1 | 0.06810 | 1.9 | 0.5197    | 3.0 | 0.05535 | 2.3 | 0.64 | 425  | 8  | 425  | 11 | 426  | 52  | 100 |
| A234 | 18858 | 394 | 30 | 0.78 | 0.2 | 0.06811 | 1.8 | 0.5181    | 2.1 | 0.05517 | 1.1 | 0.85 | 425  | 7  | 424  | 7  | 419  | 25  | 101 |
| A281 | 17983 | 344 | 25 | 0.66 | 0.2 | 0.06816 | 1.9 | 0.5202    | 2.3 | 0.05535 | 1.4 | 0.79 | 425  | 8  | 425  | 8  | 427  | 32  | 100 |
| A245 | 10652 | 239 | 17 | 0.56 | 0.0 | 0.06817 | 2.1 | 0.5242    | 2.8 | 0.05577 | 1.9 | 0.75 | 425  | 9  | 428  | 10 | 443  | 41  | 96  |
| A279 | 13763 | 253 | 20 | 0.92 | 0.6 | 0.06822 | 1.9 | 0.5205    | 3.3 | 0.05534 | 2.7 | 0.58 | 425  | 8  | 426  | 12 | 426  | 60  | 100 |
| A315 | 9262  | 167 | 15 | 1.68 | 0.3 | 0.06822 | 2.0 | 0.5213    | 3.3 | 0.05542 | 2.6 | 0.60 | 425  | 8  | 426  | 11 | 429  | 58  | 99  |
| A278 | 11097 | 207 | 19 | 1.71 | 1.4 | 0.06825 | 1.9 | 0.5207    | 3.2 | 0.05534 | 2.6 | 0.59 | 426  | 8  | 426  | 11 | 426  | 57  | 100 |
| A256 | 27666 | 573 | 54 | 1.85 | 0.1 | 0.06830 | 1.9 | 0.5213    | 2.2 | 0.05535 | 1.3 | 0.83 | 426  | 8  | 426  | 8  | 427  | 28  | 100 |
| A228 | 27644 | 430 | 33 | 1.41 | 3.7 | 0.06837 | 2.1 | 0.522     | 9.7 | 0.05538 | 9.5 | 0.22 | 426  | 9  | 427  | 35 | 427  | 212 | 100 |
| A257 | 18681 | 369 | 29 | 0.87 | 0.9 | 0.06837 | 1.8 | 0.5216    | 2.6 | 0.05533 | 1.9 | 0.70 | 426  | 8  | 426  | 9  | 426  | 41  | 100 |
| A235 | 15086 | 299 | 23 | 0.81 | 0.7 | 0.06845 | 1.8 | 0.5233    | 2.7 | 0.05544 | 2.0 | 0.68 | 427  | 8  | 427  | 9  | 430  | 44  | 99  |
| A299 | 8038  | 155 | 12 | 0.84 | 0.4 | 0.06857 | 1.8 | 0.5222    | 3.2 | 0.05523 | 2.6 | 0.58 | 428  | 8  | 427  | 11 | 421  | 58  | 101 |
| A248 | 14177 | 278 | 21 | 0.75 | 0.2 | 0.06924 | 1.8 | 0.5267    | 2.6 | 0.05517 | 1.9 | 0.69 | 432  | 8  | 430  | 9  | 419  | 42  | 103 |
| A259 | 4973  | 66  | 8  | 1.23 | 0.6 | 0.09737 | 1.8 | 0.8041135 | 2.5 | 0.0599  | 1.8 | 0.71 | 599  | 10 | 599  | 12 | 600  | 39  | 100 |
| A265 | 37697 | 82  | 30 | 0.57 | 0.5 | 0.32990 | 1.8 | 4.972     | 2.1 | 0.1093  | 1.1 | 0.86 | 1838 | 29 | 1815 | 18 | 1788 | 20  | 103 |
