# Supplementary material for: Provenance of lower Palaeozoic metasediments of the East Odenwald (Mid-German-Crystalline Zone, Variscides)—a correlation with the East European Platform (Poland)
Source: Springer Nature journal article supplement (doi:10.1007/s00531-021-02103-y), 2021-09-21
Supplement: MOESM2 [file 531_2021_2103_MOESM2_ESM.pdf]

| grain       | $^{207}\text{Pb}^a$<br>(cps) | $\text{U}^b$<br>(ppm) | $\text{Pb}^b$<br>(ppm) | $\text{Th}^b$<br>U | $^{206}\text{Pbc}^c$<br>(%) | $\frac{^{206}\text{Pbd}^d}{^{238}\text{U}}$<br>(%) | $\pm 2\sigma$ | $\frac{^{207}\text{Pbd}^d}{^{235}\text{U}}$<br>(%) | $\pm 2\sigma$ | $\frac{^{207}\text{Pbd}^d}{^{206}\text{Pb}}$<br>(%) | $\pm 2\sigma$ | rho <sup>e</sup> | $\frac{^{206}\text{Pb}}{^{238}\text{U}}$ | $\pm 2\sigma$<br>(Ma) | $\frac{^{207}\text{Pb}}{^{235}\text{U}}$ | $\pm 2\sigma$<br>(Ma) | $\frac{^{207}\text{Pb}}{^{206}\text{Pb}}$ | $\pm 2\sigma$<br>(Ma) | conc.<br>(%) |
|-------------|------------------------------|-----------------------|------------------------|--------------------|-----------------------------|----------------------------------------------------|---------------|----------------------------------------------------|---------------|-----------------------------------------------------|---------------|------------------|------------------------------------------|-----------------------|------------------------------------------|-----------------------|-------------------------------------------|-----------------------|--------------|
| Sample 2    | Metavolcanoclastic           |                       |                        |                    |                             |                                                    |               |                                                    |               |                                                     |               |                  |                                          |                       |                                          |                       |                                           |                       |              |
| Do554       |                              |                       |                        |                    |                             |                                                    |               |                                                    |               |                                                     |               |                  |                                          |                       |                                          |                       |                                           |                       |              |
| A174        | 10855                        | 330                   | 25                     | 1.75               | 2.6                         | 0.05841                                            | 4.4           | 0.4365                                             | 7.3           | 0.0542                                              | 5.8           | 0.60             | 366                                      | 16                    | 368                                      | 23                    | 380                                       | 131                   | 96           |
| A166        | 9419                         | 312                   | 22                     | 0.97               | 2.0                         | 0.05906                                            | 4.6           | 0.441                                              | 5.5           | 0.05415                                             | 3.1           | 0.83             | 370                                      | 17                    | 371                                      | 17                    | 377                                       | 69                    | 98           |
| A151        | 14279                        | 474                   | 32                     | 0.82               | 1.4                         | 0.05917                                            | 4.4           | 0.4402                                             | 5.6           | 0.05396                                             | 3.4           | 0.79             | 371                                      | 15                    | 370                                      | 18                    | 369                                       | 77                    | 100          |
| A176        | 25441                        | 840                   | 58                     | 0.88               | 4.3                         | 0.06134                                            | 5.0           | 0.46                                               | 8.4           | 0.05438                                             | 6.8           | 0.59             | 384                                      | 19                    | 384                                      | 27                    | 387                                       | 152                   | 99           |
| <b>A114</b> | <b>8100</b>                  | <b>233</b>            | <b>16</b>              | <b>0.71</b>        | <b>0.2</b>                  | <b>0.06161</b>                                     | <b>1.7</b>    | <b>0.4706</b>                                      | <b>2.3</b>    | <b>0.0554</b>                                       | <b>1.5</b>    | <b>0.74</b>      | <b>385</b>                               | <b>6</b>              | <b>392</b>                               | <b>7</b>              | <b>428</b>                                | <b>34</b>             | <b>90</b>    |
| A73         | 14324                        | 374                   | 27                     | 0.80               | 0.5                         | 0.06503                                            | 2.1           | 0.4907                                             | 4.5           | 0.05473                                             | 4.0           | 0.46             | 406                                      | 8                     | 405                                      | 15                    | 401                                       | 90                    | 101          |
| A08         | 8115                         | 224                   | 15                     | 0.41               | 0.4                         | 0.06524                                            | 1.9           | 0.5018                                             | 2.8           | 0.05579                                             | 2.0           | 0.68             | 407                                      | 7                     | 413                                      | 9                     | 444                                       | 45                    | 92           |
| A77         | 10346                        | 296                   | 22                     | 0.77               | 2.4                         | 0.06625                                            | 1.7           | 0.5067                                             | 4.7           | 0.05547                                             | 4.4           | 0.36             | 414                                      | 7                     | 416                                      | 16                    | 431                                       | 97                    | 96           |
| A107        | 12732                        | 362                   | 25                     | 0.51               | 0.1                         | 0.06626                                            | 1.7           | 0.5098                                             | 2.1           | 0.0558                                              | 1.2           | 0.82             | 414                                      | 7                     | 418                                      | 7                     | 445                                       | 26                    | 93           |
| A64         | 11672                        | 319                   | 25                     | 1.02               | 0.5                         | 0.06631                                            | 1.7           | 0.5052                                             | 2.6           | 0.05526                                             | 2.0           | 0.64             | 414                                      | 7                     | 415                                      | 9                     | 423                                       | 45                    | 98           |
| A156        | 5171                         | 172                   | 12                     | 1.07               | 1.1                         | 0.06644                                            | 4.1           | 0.4993                                             | 5.0           | 0.0545                                              | 2.8           | 0.82             | 415                                      | 16                    | 411                                      | 17                    | 392                                       | 64                    | 106          |
| A38         | 6549                         | 176                   | 15                     | 1.37               | 0.2                         | 0.06645                                            | 1.7           | 0.5118                                             | 2.5           | 0.05586                                             | 1.8           | 0.68             | 415                                      | 7                     | 420                                      | 9                     | 447                                       | 40                    | 93           |
| A62         | 33222                        | 337                   | 32                     | 1.18               | 9.1                         | 0.06647                                            | 3.3           | 0.5061                                             | 13.5          | 0.05523                                             | 13.1          | 0.25             | 415                                      | 13                    | 416                                      | 47                    | 421                                       | 292                   | 98           |
| A90         | 16761                        | 337                   | 27                     | 0.95               | 3.5                         | 0.06666                                            | 1.9           | 0.5058                                             | 8.0           | 0.05504                                             | 7.8           | 0.23             | 416                                      | 8                     | 416                                      | 28                    | 414                                       | 174                   | 101          |
| A22         | 9780                         | 344                   | 25                     | 0.61               | 0.1                         | 0.06675                                            | 1.6           | 0.5098                                             | 2.1           | 0.0554                                              | 1.3           | 0.77             | 417                                      | 7                     | 418                                      | 7                     | 428                                       | 30                    | 97           |
| A49         | 7679                         | 215                   | 18                     | 1.30               | 5.1                         | 0.06711                                            | 1.7           | 0.5149                                             | 8.7           | 0.05565                                             | 8.6           | 0.20             | 419                                      | 7                     | 422                                      | 31                    | 438                                       | 191                   | 96           |
| A49         | 7679                         | 216                   | 18                     | 1.30               | 5.1                         | 0.06712                                            | 1.7           | 0.515                                              | 8.7           | 0.05565                                             | 8.6           | 0.20             | 419                                      | 7                     | 422                                      | 31                    | 438                                       | 191                   | 96           |
| A48         | 13673                        | 412                   | 31                     | 0.80               | 2.8                         | 0.06719                                            | 1.7           | 0.5136                                             | 5.1           | 0.05543                                             | 4.8           | 0.34             | 419                                      | 7                     | 421                                      | 18                    | 430                                       | 107                   | 98           |
| A85         | 5892                         | 173                   | 13                     | 0.63               | 0.1                         | 0.06742                                            | 1.7           | 0.5129                                             | 2.8           | 0.05517                                             | 2.2           | 0.61             | 421                                      | 7                     | 420                                      | 10                    | 419                                       | 49                    | 100          |
| A30         | 7686                         | 223                   | 16                     | 0.52               | b.d.                        | 0.06747                                            | 1.6           | 0.5176                                             | 2.1           | 0.05564                                             | 1.4           | 0.76             | 421                                      | 7                     | 424                                      | 7                     | 438                                       | 31                    | 96           |
| A118        | 7824                         | 189                   | 14                     | 0.82               | 0.4                         | 0.06759                                            | 2.1           | 0.5258                                             | 2.6           | 0.05642                                             | 1.5           | 0.82             | 422                                      | 9                     | 429                                      | 9                     | 469                                       | 33                    | 90           |
| A94         | 10267                        | 288                   | 22                     | 0.79               | 0.1                         | 0.06762                                            | 1.8           | 0.5222                                             | 2.2           | 0.056                                               | 1.3           | 0.81             | 422                                      | 7                     | 427                                      | 8                     | 453                                       | 29                    | 93           |
| A111        | 7995                         | 219                   | 16                     | 0.67               | 2.0                         | 0.06785                                            | 1.7           | 0.5163                                             | 4.0           | 0.05519                                             | 3.6           | 0.42             | 423                                      | 7                     | 423                                      | 14                    | 420                                       | 81                    | 101          |
| A141        | 10389                        | 307                   | 24                     | 1.06               | 1.3                         | 0.06787                                            | 4.0           | 0.5154                                             | 4.6           | 0.05508                                             | 2.2           | 0.87             | 423                                      | 16                    | 422                                      | 16                    | 415                                       | 50                    | 102          |
| A95         | 6628                         | 183                   | 13                     | 0.53               | 1.3                         | 0.06790                                            | 1.7           | 0.5181                                             | 3.3           | 0.05533                                             | 2.9           | 0.51             | 424                                      | 7                     | 424                                      | 12                    | 426                                       | 64                    | 99           |
| A99         | 9069                         | 265                   | 19                     | 0.65               | 2.3                         | 0.06812                                            | 1.6           | 0.5207                                             | 4.5           | 0.05544                                             | 4.2           | 0.36             | 425                                      | 7                     | 426                                      | 16                    | 430                                       | 93                    | 99           |
| A28         | 5136                         | 147                   | 11                     | 0.68               | 0.5                         | 0.06824                                            | 3.0           | 0.5291                                             | 4.3           | 0.05623                                             | 3.1           | 0.69             | 426                                      | 12                    | 431                                      | 15                    | 461                                       | 70                    | 92           |
| A23         | 6485                         | 182                   | 14                     | 0.73               | 0.1                         | 0.06831                                            | 1.9           | 0.5245                                             | 2.6           | 0.05568                                             | 1.9           | 0.71             | 426                                      | 8                     | 428                                      | 9                     | 440                                       | 41                    | 97           |
| A78         | 13748                        | 367                   | 30                     | 0.99               | 0.1                         | 0.06889                                            | 2.0           | 0.5322                                             | 2.5           | 0.05603                                             | 1.5           | 0.80             | 429                                      | 8                     | 433                                      | 9                     | 454                                       | 33                    | 95           |
| A86         | 11310                        | 290                   | 23                     | 0.85               | 0.1                         | 0.06889                                            | 2.1           | 0.5295                                             | 2.7           | 0.05574                                             | 1.7           | 0.78             | 429                                      | 9                     | 431                                      | 9                     | 442                                       | 37                    | 97           |

|      |       |     |     |       |      |         |     |        |     |         |     |      |     |    |     |    |     |     |     |
|------|-------|-----|-----|-------|------|---------|-----|--------|-----|---------|-----|------|-----|----|-----|----|-----|-----|-----|
| A59  | 10062 | 280 | 21  | 0.75  | 2.8  | 0.06892 | 1.9 | 0.5338 | 5.1 | 0.05618 | 4.8 | 0.38 | 430 | 8  | 434 | 18 | 459 | 106 | 94  |
| A09  | 13981 | 380 | 29  | 0.74  | 0.1  | 0.06898 | 1.8 | 0.5284 | 5.1 | 0.05556 | 4.7 | 0.36 | 430 | 8  | 431 | 18 | 435 | 105 | 99  |
| A101 | 8594  | 240 | 17  | 0.53  | 0.7  | 0.06906 | 1.7 | 0.5304 | 3.3 | 0.0557  | 2.8 | 0.52 | 430 | 7  | 432 | 12 | 441 | 62  | 98  |
| A144 | 7567  | 279 | 21  | 0.76  | 0.6  | 0.06916 | 3.9 | 0.536  | 4.5 | 0.05621 | 2.3 | 0.86 | 431 | 16 | 436 | 16 | 461 | 51  | 94  |
| A145 | 5485  | 206 | 16  | 0.71  | 0.0  | 0.06922 | 4.1 | 0.532  | 4.3 | 0.05575 | 1.5 | 0.94 | 431 | 17 | 433 | 15 | 442 | 34  | 98  |
| A55  | 10076 | 274 | 21  | 0.81  | b.d. | 0.06924 | 1.7 | 0.5316 | 2.4 | 0.05568 | 1.7 | 0.70 | 432 | 7  | 433 | 8  | 440 | 38  | 98  |
| A06  | 14106 | 413 | 31  | 0.69  | 2.4  | 0.06926 | 1.8 | 0.53   | 4.6 | 0.05579 | 4.2 | 0.40 | 432 | 8  | 434 | 16 | 444 | 93  | 97  |
| A20  | 6283  | 190 | 14  | 0.81  | 0.0  | 0.06928 | 1.6 | 0.5292 | 2.8 | 0.0554  | 2.3 | 0.57 | 432 | 7  | 431 | 10 | 428 | 51  | 101 |
| A27  | 15325 | 305 | 23  | 0.73  | 2.7  | 0.06959 | 1.7 | 0.532  | 5.1 | 0.05545 | 4.8 | 0.34 | 434 | 7  | 433 | 18 | 430 | 107 | 101 |
| A163 | 5897  | 214 | 18  | 1.14  | 0.3  | 0.06959 | 4.0 | 0.534  | 4.6 | 0.05566 | 2.4 | 0.86 | 434 | 17 | 434 | 16 | 439 | 53  | 99  |
| A158 | 12095 | 417 | 30  | 0.41  | 1.0  | 0.06971 | 3.9 | 0.5382 | 5.5 | 0.05599 | 3.9 | 0.71 | 434 | 16 | 437 | 20 | 452 | 86  | 96  |
| A40  | 6942  | 200 | 16  | 0.88  | 0.7  | 0.06976 | 1.9 | 0.5357 | 3.1 | 0.05569 | 2.4 | 0.61 | 435 | 8  | 436 | 11 | 440 | 54  | 99  |
| A17  | 10587 | 279 | 22  | 0.97  | 1.0  | 0.06983 | 3.1 | 0.53   | 5.1 | 0.05526 | 4.0 | 0.62 | 435 | 13 | 433 | 18 | 423 | 88  | 103 |
| A47  | 6053  | 163 | 12  | 0.72  | 2.2  | 0.07024 | 1.7 | 0.5363 | 4.5 | 0.05538 | 4.1 | 0.38 | 438 | 7  | 436 | 16 | 428 | 92  | 102 |
| A10  | 10095 | 274 | 20  | 0.46  | 0.3  | 0.07025 | 1.7 | 0.5477 | 2.5 | 0.05655 | 1.8 | 0.68 | 438 | 7  | 443 | 9  | 474 | 41  | 92  |
| A51  | 10406 | 274 | 22  | 0.77  | 0.2  | 0.07029 | 2.0 | 0.5445 | 2.5 | 0.05619 | 1.4 | 0.81 | 438 | 8  | 441 | 9  | 460 | 32  | 95  |
| A29  | 5807  | 174 | 13  | 0.65  | 3.0  | 0.07052 | 1.7 | 0.5419 | 5.6 | 0.0557  | 5.3 | 0.31 | 439 | 7  | 440 | 20 | 442 | 118 | 99  |
| A165 | 7874  | 288 | 26  | 1.53  | 0.6  | 0.07053 | 3.9 | 0.545  | 4.6 | 0.05604 | 2.4 | 0.86 | 439 | 17 | 442 | 17 | 454 | 52  | 97  |
| A54  | 6386  | 204 | 15  | 0.57  | 0.2  | 0.07054 | 1.9 | 0.5412 | 2.9 | 0.05565 | 2.2 | 0.65 | 439 | 8  | 439 | 10 | 438 | 48  | 100 |
| A164 | 9017  | 320 | 29  | 1.44  | 0.1  | 0.07063 | 4.1 | 0.546  | 4.5 | 0.05607 | 1.8 | 0.92 | 440 | 18 | 442 | 16 | 455 | 40  | 97  |
| A24  | 13652 | 359 | 28  | 0.96  | 0.7  | 0.07065 | 1.9 | 0.5434 | 4.6 | 0.05578 | 4.2 | 0.41 | 440 | 8  | 441 | 16 | 444 | 92  | 99  |
| A19  | 5004  | 132 | 11  | 1.05  | 0.4  | 0.07078 | 1.7 | 0.5536 | 3.1 | 0.05672 | 2.6 | 0.54 | 441 | 7  | 447 | 11 | 481 | 58  | 92  |
| A162 | 3515  | 139 | 10  | 0.36  | 0.5  | 0.07080 | 4.0 | 0.5433 | 5.6 | 0.05565 | 3.8 | 0.72 | 441 | 17 | 441 | 20 | 438 | 85  | 101 |
| A98  | 11029 | 250 | 129 | 33.52 | 0.5  | 0.07081 | 1.9 | 0.5563 | 2.3 | 0.05698 | 1.4 | 0.79 | 441 | 8  | 449 | 8  | 491 | 31  | 90  |
| A63  | 6418  | 188 | 14  | 0.49  | 1.8  | 0.07105 | 1.8 | 0.5442 | 4.2 | 0.05555 | 3.8 | 0.42 | 443 | 8  | 441 | 15 | 434 | 85  | 102 |
| A46  | 12959 | 327 | 27  | 0.96  | 0.7  | 0.07108 | 2.0 | 0.5457 | 5.2 | 0.05568 | 4.7 | 0.39 | 443 | 9  | 442 | 19 | 440 | 105 | 101 |
| A100 | 11198 | 276 | 23  | 0.87  | 2.6  | 0.07138 | 1.8 | 0.5504 | 5.2 | 0.05592 | 4.8 | 0.35 | 444 | 8  | 445 | 19 | 449 | 107 | 99  |
| A153 | 8832  | 350 | 24  | 0.23  | 0.0  | 0.07159 | 3.9 | 0.5418 | 4.2 | 0.05489 | 1.6 | 0.93 | 446 | 17 | 440 | 15 | 408 | 35  | 109 |
| A65  | 6697  | 197 | 15  | 0.44  | 1.5  | 0.07175 | 1.8 | 0.5525 | 3.9 | 0.05585 | 3.4 | 0.47 | 447 | 8  | 447 | 14 | 446 | 77  | 100 |
| A56  | 13929 | 375 | 27  | 0.26  | 0.1  | 0.07179 | 1.7 | 0.5535 | 2.2 | 0.05591 | 1.4 | 0.78 | 447 | 7  | 447 | 8  | 449 | 30  | 100 |
| A58  | 11684 | 278 | 22  | 1.12  | 0.4  | 0.07205 | 1.8 | 0.5522 | 3.3 | 0.05558 | 2.7 | 0.56 | 449 | 8  | 446 | 12 | 436 | 60  | 103 |
| A88  | 7388  | 192 | 17  | 1.30  | 1.0  | 0.07208 | 2.1 | 0.5549 | 9.5 | 0.05583 | 9.2 | 0.22 | 449 | 9  | 448 | 35 | 446 | 205 | 101 |
| A44  | 16415 | 344 | 29  | 0.96  | 1.5  | 0.07221 | 1.9 | 0.5553 | 8.4 | 0.05577 | 8.2 | 0.22 | 449 | 8  | 448 | 31 | 443 | 182 | 101 |
| A173 | 6701  | 239 | 20  | 0.88  | 0.6  | 0.07239 | 3.9 | 0.5697 | 4.4 | 0.05708 | 2.1 | 0.88 | 451 | 17 | 458 | 16 | 495 | 47  | 91  |
| A11  | 7149  | 150 | 12  | 0.68  | 1.0  | 0.07278 | 1.7 | 0.5712 | 3.9 | 0.05692 | 3.5 | 0.43 | 453 | 7  | 459 | 14 | 488 | 77  | 93  |
| A140 | 14027 | 429 | 35  | 0.87  | 0.9  | 0.07321 | 4.3 | 0.5612 | 5.0 | 0.0556  | 2.6 | 0.86 | 455 | 19 | 452 | 18 | 436 | 57  | 104 |

|      |        |     |     |      |      |         |     |        |     |         |     |      |      |    |      |    |      |     |     |
|------|--------|-----|-----|------|------|---------|-----|--------|-----|---------|-----|------|------|----|------|----|------|-----|-----|
| A25  | 10182  | 285 | 22  | 0.47 | 1.8  | 0.07344 | 2.7 | 0.5663 | 4.3 | 0.05593 | 3.4 | 0.61 | 457  | 12 | 456  | 16 | 449  | 76  | 102 |
| A168 | 6090   | 235 | 20  | 1.10 | 0.5  | 0.07348 | 3.9 | 0.573  | 4.7 | 0.05655 | 2.7 | 0.82 | 457  | 17 | 460  | 18 | 474  | 59  | 96  |
| A93  | 28454  | 628 | 51  | 0.91 | 2.3  | 0.07359 | 2.2 | 0.5687 | 6.6 | 0.05605 | 6.2 | 0.33 | 458  | 10 | 457  | 25 | 454  | 138 | 101 |
| A76  | 30097  | 753 | 63  | 0.81 | 2.9  | 0.07368 | 1.9 | 0.574  | 5.2 | 0.0565  | 4.9 | 0.36 | 458  | 8  | 461  | 19 | 472  | 107 | 97  |
| A154 | 12170  | 389 | 31  | 1.14 | 1.2  | 0.07380 | 4.0 | 0.5654 | 5.1 | 0.05557 | 3.3 | 0.77 | 459  | 18 | 455  | 19 | 435  | 73  | 106 |
| A117 | 14509  | 344 | 27  | 0.59 | 0.7  | 0.07397 | 2.3 | 0.5725 | 4.0 | 0.05614 | 3.3 | 0.57 | 460  | 10 | 460  | 15 | 458  | 73  | 100 |
| A26  | 15923  | 420 | 40  | 2.86 | 0.0  | 0.07403 | 2.5 | 0.5721 | 3.4 | 0.05605 | 2.3 | 0.73 | 460  | 11 | 459  | 13 | 454  | 51  | 101 |
| A32  | 11258  | 275 | 23  | 0.70 | 0.6  | 0.07410 | 1.9 | 0.573  | 3.4 | 0.05608 | 2.9 | 0.55 | 461  | 8  | 460  | 13 | 455  | 63  | 101 |
| A143 | 4374   | 135 | 10  | 0.27 | 1.9  | 0.07425 | 4.3 | 0.5713 | 5.1 | 0.05581 | 2.7 | 0.84 | 462  | 19 | 459  | 19 | 445  | 61  | 104 |
| A41  | 13694  | 353 | 28  | 0.62 | 2.4  | 0.07444 | 2.3 | 0.5734 | 5.0 | 0.05587 | 4.4 | 0.47 | 463  | 10 | 460  | 19 | 447  | 97  | 104 |
| A97  | 13902  | 375 | 32  | 0.95 | 2.9  | 0.07490 | 1.8 | 0.5828 | 5.2 | 0.05644 | 4.9 | 0.34 | 466  | 8  | 466  | 20 | 470  | 108 | 99  |
| A82  | 14425  | 355 | 31  | 1.01 | 0.0  | 0.07617 | 1.7 | 0.5987 | 2.4 | 0.05701 | 1.7 | 0.70 | 473  | 8  | 476  | 9  | 492  | 38  | 96  |
| A89  | 12000  | 301 | 26  | 1.01 | 0.3  | 0.07634 | 2.0 | 0.6068 | 2.6 | 0.05765 | 1.6 | 0.77 | 474  | 9  | 482  | 10 | 517  | 36  | 92  |
| A160 | 7991   | 286 | 24  | 0.68 | 0.7  | 0.07722 | 4.0 | 0.6054 | 4.6 | 0.05685 | 2.2 | 0.88 | 480  | 19 | 481  | 18 | 486  | 49  | 99  |
| A160 | 7991   | 286 | 24  | 0.68 | 0.7  | 0.07737 | 4.0 | 0.6065 | 4.6 | 0.05685 | 2.2 | 0.88 | 480  | 19 | 481  | 18 | 486  | 49  | 99  |
| A52  | 10316  | 261 | 22  | 0.72 | 0.2  | 0.07785 | 1.9 | 0.6207 | 2.7 | 0.05782 | 1.9 | 0.70 | 483  | 9  | 490  | 11 | 523  | 42  | 92  |
| A60  | 22522  | 547 | 45  | 0.76 | 0.7  | 0.07786 | 2.9 | 0.6112 | 3.3 | 0.05693 | 1.7 | 0.86 | 483  | 13 | 484  | 13 | 489  | 37  | 99  |
| A21  | 6326   | 174 | 14  | 0.60 | b.d. | 0.07789 | 1.7 | 0.6151 | 2.7 | 0.05727 | 2.1 | 0.62 | 484  | 8  | 487  | 11 | 502  | 47  | 96  |
| A31  | 13337  | 342 | 30  | 0.83 | 0.9  | 0.07952 | 1.9 | 0.6319 | 2.7 | 0.05763 | 1.9 | 0.71 | 493  | 9  | 497  | 11 | 516  | 42  | 96  |
| A170 | 9228   | 161 | 17  | 0.97 | 4.7  | 0.08096 | 4.0 | 0.637  | 6.0 | 0.05706 | 4.4 | 0.67 | 502  | 19 | 500  | 24 | 494  | 97  | 102 |
| A15  | 12805  | 322 | 30  | 0.96 | 1.6  | 0.08206 | 2.0 | 0.6471 | 5.2 | 0.05719 | 4.8 | 0.39 | 508  | 10 | 507  | 21 | 499  | 105 | 102 |
| A57  | 8987   | 243 | 22  | 0.84 | 0.7  | 0.08280 | 2.1 | 0.6743 | 4.3 | 0.05907 | 3.8 | 0.48 | 513  | 10 | 523  | 18 | 570  | 83  | 90  |
| A115 | 11116  | 233 | 26  | 1.46 | 4.3  | 0.08776 | 1.7 | 0.7063 | 7.1 | 0.05837 | 6.9 | 0.24 | 542  | 9  | 543  | 30 | 544  | 151 | 100 |
| A13  | 6612   | 172 | 19  | 1.65 | 0.4  | 0.08808 | 1.7 | 0.7069 | 4.4 | 0.05821 | 4.1 | 0.39 | 544  | 9  | 543  | 19 | 538  | 90  | 101 |
| A112 | 26499  | 561 | 55  | 0.92 | 2.3  | 0.08928 | 2.3 | 0.7191 | 6.1 | 0.05842 | 5.7 | 0.37 | 551  | 12 | 550  | 26 | 545  | 124 | 101 |
| A18  | 4246   | 135 | 14  | 1.70 | b.d. | 0.08954 | 2.1 | 0.7261 | 3.3 | 0.05881 | 2.5 | 0.64 | 553  | 11 | 554  | 14 | 560  | 56  | 99  |
| A171 | 5083   | 180 | 19  | 1.20 | 0.7  | 0.09087 | 3.9 | 0.7516 | 5.4 | 0.05998 | 3.7 | 0.72 | 561  | 21 | 569  | 24 | 603  | 81  | 93  |
| A92  | 20463  | 393 | 40  | 0.67 | 0.0  | 0.09306 | 1.8 | 0.7648 | 2.2 | 0.05961 | 1.3 | 0.81 | 574  | 10 | 577  | 10 | 589  | 28  | 97  |
| A16  | 10045  | 254 | 28  | 1.19 | 4.8  | 0.09467 | 1.9 | 0.7749 | 7.9 | 0.05936 | 7.7 | 0.24 | 583  | 10 | 583  | 36 | 580  | 167 | 100 |
| A172 | 3877   | 118 | 11  | 0.33 | 0.7  | 0.09566 | 3.9 | 0.794  | 5.3 | 0.0602  | 3.7 | 0.73 | 589  | 22 | 593  | 24 | 611  | 79  | 96  |
| A12  | 23244  | 475 | 51  | 0.97 | 3.3  | 0.09601 | 1.7 | 0.7918 | 5.6 | 0.05981 | 5.3 | 0.31 | 591  | 10 | 592  | 25 | 597  | 115 | 99  |
| A169 | 9031   | 327 | 31  | 0.39 | 0.3  | 0.09801 | 4.0 | 0.8079 | 4.2 | 0.05978 | 1.5 | 0.93 | 603  | 23 | 601  | 19 | 596  | 33  | 101 |
| A81  | 19880  | 385 | 43  | 1.08 | 0.7  | 0.10170 | 2.0 | 0.8552 | 2.6 | 0.06099 | 1.7 | 0.76 | 624  | 12 | 627  | 12 | 639  | 36  | 98  |
| A175 | 240174 | 401 | 231 | 0.46 | 4.9  | 0.51730 | 3.9 | 12.95  | 4.7 | 0.1816  | 2.6 | 0.83 | 2688 | 86 | 2676 | 45 | 2668 | 43  | 101 |

discordant

|      |       |     |    |      |     |         |     |        |     |         |     |      |     |    |     |    |      |     |     |
|------|-------|-----|----|------|-----|---------|-----|--------|-----|---------|-----|------|-----|----|-----|----|------|-----|-----|
| A167 | 4469  | 244 | 10 | 4.58 | 3.0 | 0.03275 | 5.8 | 0.2336 | 6.8 | 0.05174 | 3.6 | 0.85 | 208 | 12 | 213 | 13 | 274  | 82  | 76  |
| A83  | 14534 | 238 | 12 | 3.18 | 4.9 | 0.03170 | 4.2 | 0.2357 | 5.9 | 0.05393 | 4.1 | 0.72 | 201 | 8  | 215 | 12 | 368  | 93  | 55  |
| A84  | 38701 | 852 | 46 | 1.42 | 5.1 | 0.04067 | 2.3 | 0.3068 | 4.7 | 0.05471 | 4.1 | 0.49 | 257 | 6  | 272 | 11 | 400  | 92  | 64  |
| A53  | 11626 | 305 | 19 | 0.72 | 0.9 | 0.05631 | 2.3 | 0.4272 | 3.1 | 0.05503 | 2.1 | 0.75 | 353 | 8  | 361 | 9  | 413  | 46  | 85  |
| A110 | 11707 | 311 | 21 | 0.89 | 0.6 | 0.05835 | 2.0 | 0.4438 | 2.6 | 0.05516 | 1.7 | 0.75 | 366 | 7  | 373 | 8  | 419  | 39  | 87  |
| A108 | 9282  | 353 | 22 | 0.42 | 1.7 | 0.05873 | 2.5 | 0.454  | 4.2 | 0.05606 | 3.4 | 0.60 | 368 | 9  | 380 | 13 | 455  | 75  | 81  |
| A07  | 7917  | 245 | 18 | 0.92 | 0.7 | 0.06504 | 1.8 | 0.5031 | 4.1 | 0.05611 | 3.7 | 0.45 | 406 | 7  | 414 | 14 | 457  | 82  | 89  |
| A42  | 12642 | 273 | 20 | 0.77 | 1.6 | 0.06107 | 3.0 | 0.4736 | 4.0 | 0.05625 | 2.6 | 0.75 | 382 | 11 | 394 | 13 | 462  | 58  | 83  |
| A72  | 7889  | 190 | 14 | 0.81 | 0.7 | 0.06576 | 1.7 | 0.5111 | 3.1 | 0.05636 | 2.6 | 0.55 | 411 | 7  | 419 | 11 | 467  | 57  | 88  |
| A66  | 6167  | 136 | 11 | 0.88 | 1.4 | 0.06580 | 1.7 | 0.5141 | 2.7 | 0.05667 | 2.1 | 0.62 | 411 | 7  | 421 | 9  | 479  | 47  | 86  |
| A161 | 11766 | 423 | 30 | 0.62 | 0.5 | 0.06606 | 3.9 | 0.5165 | 4.4 | 0.05671 | 2.1 | 0.88 | 412 | 16 | 423 | 15 | 480  | 45  | 86  |
| A61  | 26937 | 417 | 28 | 0.90 | 4.8 | 0.04950 | 2.7 | 0.3871 | 4.8 | 0.05672 | 3.9 | 0.57 | 311 | 8  | 332 | 14 | 481  | 87  | 65  |
| A50  | 9561  | 213 | 17 | 1.03 | 1.0 | 0.06692 | 2.9 | 0.5239 | 3.3 | 0.05678 | 1.5 | 0.88 | 418 | 12 | 428 | 12 | 483  | 34  | 86  |
| A79  | 12589 | 366 | 28 | 1.05 | 1.0 | 0.06530 | 1.8 | 0.5114 | 2.6 | 0.0568  | 1.9 | 0.69 | 408 | 7  | 419 | 9  | 484  | 41  | 84  |
| A74  | 13298 | 310 | 24 | 0.69 | 0.9 | 0.06767 | 1.6 | 0.5309 | 3.4 | 0.05689 | 3.0 | 0.48 | 422 | 7  | 432 | 12 | 487  | 67  | 87  |
| A87  | 14346 | 256 | 21 | 1.20 | 2.3 | 0.06610 | 2.0 | 0.5209 | 4.1 | 0.05716 | 3.6 | 0.48 | 413 | 8  | 426 | 14 | 498  | 80  | 83  |
| A142 | 15314 | 309 | 28 | 0.99 | 4.4 | 0.07162 | 4.2 | 0.5647 | 5.9 | 0.05719 | 4.1 | 0.71 | 446 | 18 | 455 | 22 | 499  | 91  | 89  |
| A109 | 12462 | 298 | 25 | 0.82 | 0.8 | 0.07262 | 1.6 | 0.5757 | 2.1 | 0.0575  | 1.3 | 0.78 | 452 | 7  | 462 | 8  | 511  | 29  | 89  |
| A80  | 10373 | 239 | 20 | 0.71 | 1.0 | 0.07589 | 2.3 | 0.6072 | 3.4 | 0.05803 | 2.4 | 0.69 | 472 | 11 | 482 | 13 | 531  | 53  | 89  |
| A14  | 8797  | 201 | 18 | 0.70 | 1.3 | 0.07970 | 1.8 | 0.646  | 2.7 | 0.05878 | 2.0 | 0.68 | 494 | 9  | 506 | 11 | 559  | 43  | 88  |
| A75  | 11692 | 207 | 17 | 0.55 | 2.5 | 0.07289 | 1.7 | 0.5937 | 3.5 | 0.05908 | 3.0 | 0.49 | 454 | 7  | 473 | 13 | 570  | 66  | 80  |
| A43  | 6211  | 70  | 5  | 1.13 | 7.1 | 0.05192 | 2.4 | 0.4258 | 5.3 | 0.05948 | 4.7 | 0.45 | 326 | 8  | 360 | 16 | 585  | 103 | 56  |
| A39  | 11549 | 259 | 22 | 0.64 | 3.5 | 0.07823 | 1.9 | 0.649  | 5.7 | 0.06018 | 5.3 | 0.34 | 486 | 9  | 508 | 23 | 610  | 115 | 80  |
| A96  | 4925  | 47  | 5  | 1.05 | 8.5 | 0.07254 | 2.4 | 0.6279 | 5.7 | 0.06278 | 5.2 | 0.42 | 451 | 10 | 495 | 23 | 701  | 111 | 64  |
| A116 | 11004 | 135 | 14 | 0.49 | 7.6 | 0.08427 | 2.1 | 0.7461 | 7.5 | 0.06421 | 7.2 | 0.29 | 522 | 11 | 566 | 33 | 749  | 152 | 70  |
| A091 | 8882  | 214 | 19 | 0.64 | 0.3 | 0.08208 | 2.0 | 0.7481 | 3.6 | 0.0661  | 3.0 | 0.56 | 509 | 10 | 567 | 16 | 810  | 63  | 63  |
| A113 | 21455 | 130 | 20 | 0.65 | 5.0 | 0.13140 | 1.7 | 1.325  | 4.1 | 0.07318 | 3.7 | 0.43 | 796 | 13 | 857 | 24 | 1019 | 74  | 78  |
| A157 | 4325  | 131 | 10 | 0.55 | 1.0 | 0.07324 | 4.0 | 0.5563 | 4.9 | 0.05508 | 2.9 | 0.81 | 456 | 17 | 449 | 18 | 416  | 65  | 110 |
| A152 | 5605  | 222 | 16 | 0.71 | 0.0 | 0.06856 | 3.9 | 0.5146 | 4.6 | 0.05445 | 2.4 | 0.86 | 427 | 16 | 422 | 16 | 390  | 53  | 110 |
| A155 | 4955  | 182 | 14 | 0.92 | 0.4 | 0.06837 | 3.9 | 0.5124 | 4.5 | 0.05435 | 2.1 | 0.88 | 426 | 16 | 420 | 15 | 386  | 47  | 111 |
