# Supplementary material for: Provenance of lower Palaeozoic metasediments of the East Odenwald (Mid-German-Crystalline Zone, Variscides)—a correlation with the East European Platform (Poland)
Source: Springer Nature journal article supplement (doi:10.1007/s00531-021-02103-y), 2021-09-21
Supplement: MOESM3 [file 531_2021_2103_MOESM3_ESM.pdf]

| grain                | $^{207}\text{Pb}^a$<br>(cps) | $\text{U}^b$<br>(ppm) | $\text{Pb}^b$<br>(ppm) | $\frac{\text{Th}^b}{\text{U}}$ | $^{206}\text{Pbc}^c$<br>(%) | $\frac{^{206}\text{Pbd}^d}{^{238}\text{U}}$ | $\pm 2\sigma$<br>(%) | $\frac{^{207}\text{Pbd}^d}{^{235}\text{U}}$ | $\pm 2\sigma$<br>(%) | $\frac{^{207}\text{Pbd}^d}{^{206}\text{Pb}}$ | $\pm 2\sigma$<br>(%) | rho <sup>e</sup> | $\frac{^{206}\text{Pb}}{^{238}\text{U}}$ | $\pm 2\sigma$<br>(Ma) | $\frac{^{207}\text{Pb}}{^{235}\text{U}}$ | $\pm 2\sigma$<br>(Ma) | $\frac{^{207}\text{Pb}}{^{206}\text{Pb}}$ | $\pm 2\sigma$<br>(Ma) | conc.<br>(%) |
|----------------------|------------------------------|-----------------------|------------------------|--------------------------------|-----------------------------|---------------------------------------------|----------------------|---------------------------------------------|----------------------|----------------------------------------------|----------------------|------------------|------------------------------------------|-----------------------|------------------------------------------|-----------------------|-------------------------------------------|-----------------------|--------------|
| <b>Do535 Schmelz</b> |                              |                       |                        |                                |                             |                                             |                      |                                             |                      |                                              |                      |                  |                                          |                       |                                          |                       |                                           |                       |              |
| A479                 | 3086                         | 103                   | 8                      | 1.04                           | 1.0                         | 0.06152                                     | 2.2                  | 0.4595                                      | 4.4                  | 0.05417                                      | 3.8                  | 0.49             | 385                                      | 8                     | 384                                      | 14                    | 378                                       | 86                    | 102          |
| A436                 | 13439                        | 434                   | 30                     | 0.66                           | 0.8                         | 0.06164                                     | 2.1                  | 0.4638                                      | 2.9                  | 0.05458                                      | 2.0                  | 0.72             | 386                                      | 8                     | 387                                      | 9                     | 395                                       | 45                    | 98           |
| <b>A512</b>          | <b>3974</b>                  | <b>131</b>            | <b>10</b>              | <b>1.04</b>                    | <b>0.6</b>                  | <b>0.06198</b>                              | <b>2.1</b>           | <b>0.4668</b>                               | <b>3.1</b>           | <b>0.05462</b>                               | <b>2.4</b>           | <b>0.66</b>      | <b>388</b>                               | <b>8</b>              | <b>389</b>                               | <b>10</b>             | <b>397</b>                                | <b>53</b>             | <b>98</b>    |
| A513                 | 2825                         | 109                   | 7                      | 0.64                           | 0.1                         | 0.06211                                     | 2.1                  | 0.4672                                      | 3.1                  | 0.05456                                      | 2.3                  | 0.67             | 388                                      | 8                     | 389                                      | 10                    | 394                                       | 51                    | 98           |
| A411                 | 10105                        | 385                   | 29                     | 1.01                           | 1.0                         | 0.06241                                     | 2.1                  | 0.471                                       | 3.0                  | 0.05474                                      | 2.2                  | 0.69             | 390                                      | 8                     | 392                                      | 10                    | 402                                       | 49                    | 97           |
| A459                 | 2205                         | 84                    | 6                      | 0.71                           | 0.2                         | 0.06245                                     | 2.1                  | 0.4685                                      | 3.8                  | 0.05441                                      | 3.1                  | 0.56             | 391                                      | 8                     | 390                                      | 12                    | 388                                       | 70                    | 101          |
| A427                 | 8198                         | 292                   | 20                     | 0.62                           | 0.7                         | 0.06254                                     | 2.1                  | 0.4695                                      | 3.0                  | 0.05445                                      | 2.2                  | 0.69             | 391                                      | 8                     | 391                                      | 10                    | 390                                       | 49                    | 100          |
| A501                 | 6593                         | 249                   | 18                     | 0.97                           | 0.2                         | 0.06258                                     | 2.1                  | 0.4705                                      | 2.9                  | 0.05453                                      | 1.9                  | 0.73             | 391                                      | 8                     | 392                                      | 9                     | 393                                       | 44                    | 100          |
| A461                 | 6170                         | 220                   | 16                     | 0.86                           | 0.2                         | 0.06272                                     | 2.2                  | 0.4712                                      | 3.2                  | 0.05449                                      | 2.3                  | 0.69             | 392                                      | 8                     | 392                                      | 10                    | 391                                       | 52                    | 100          |
| A450                 | 1807                         | 70                    | 5                      | 0.76                           | 0.8                         | 0.06315                                     | 2.1                  | 0.4732                                      | 3.9                  | 0.05435                                      | 3.3                  | 0.55             | 395                                      | 8                     | 393                                      | 13                    | 386                                       | 73                    | 102          |
| A470                 | 4254                         | 154                   | 10                     | 0.55                           | 0.1                         | 0.06329                                     | 2.1                  | 0.4763                                      | 3.3                  | 0.05458                                      | 2.5                  | 0.65             | 396                                      | 8                     | 396                                      | 11                    | 395                                       | 56                    | 100          |
| A485                 | 2035                         | 79                    | 6                      | 0.90                           | 1.2                         | 0.06336                                     | 2.1                  | 0.4783                                      | 3.6                  | 0.05475                                      | 2.9                  | 0.59             | 396                                      | 8                     | 397                                      | 12                    | 402                                       | 65                    | 99           |
| A514                 | 9369                         | 339                   | 23                     | 0.58                           | 0.3                         | 0.06360                                     | 2.1                  | 0.4779                                      | 2.6                  | 0.0545                                       | 1.5                  | 0.80             | 397                                      | 8                     | 397                                      | 9                     | 392                                       | 35                    | 101          |
| A500                 | 30354                        | 888                   | 73                     | 0.05                           | 3.0                         | 0.06369                                     | 2.2                  | 0.4808                                      | 5.2                  | 0.05475                                      | 4.7                  | 0.43             | 398                                      | 9                     | 399                                      | 17                    | 402                                       | 105                   | 99           |
| A412                 | 10307                        | 373                   | 29                     | 1.15                           | 2.1                         | 0.06372                                     | 2.1                  | 0.4799                                      | 4.4                  | 0.05462                                      | 3.9                  | 0.48             | 398                                      | 8                     | 398                                      | 15                    | 397                                       | 87                    | 100          |
| A489                 | 6747                         | 251                   | 18                     | 0.89                           | 0.4                         | 0.06372                                     | 2.2                  | 0.4815                                      | 3.5                  | 0.05481                                      | 2.8                  | 0.62             | 398                                      | 8                     | 399                                      | 12                    | 404                                       | 62                    | 98           |
| A466                 | 13440                        | 455                   | 32                     | 0.66                           | 0.5                         | 0.06392                                     | 2.1                  | 0.4816                                      | 2.6                  | 0.05464                                      | 1.5                  | 0.80             | 399                                      | 8                     | 399                                      | 9                     | 398                                       | 35                    | 100          |
| A468                 | 1688                         | 63                    | 4                      | 0.65                           | 0.2                         | 0.06394                                     | 2.1                  | 0.4813                                      | 3.3                  | 0.0546                                       | 2.6                  | 0.63             | 400                                      | 8                     | 399                                      | 11                    | 396                                       | 58                    | 101          |
| A508                 | 11955                        | 364                   | 27                     | 0.87                           | 1.5                         | 0.06400                                     | 2.2                  | 0.4811                                      | 4.2                  | 0.05452                                      | 3.6                  | 0.52             | 400                                      | 9                     | 399                                      | 14                    | 393                                       | 81                    | 102          |
| A447                 | 4797                         | 170                   | 13                     | 1.20                           | 0.0                         | 0.06415                                     | 2.1                  | 0.4828                                      | 2.9                  | 0.05457                                      | 2.0                  | 0.74             | 401                                      | 8                     | 400                                      | 10                    | 395                                       | 44                    | 102          |
| A473                 | 9817                         | 348                   | 29                     | 1.49                           | 1.3                         | 0.06420                                     | 2.1                  | 0.4834                                      | 3.4                  | 0.05461                                      | 2.7                  | 0.61             | 401                                      | 8                     | 400                                      | 11                    | 396                                       | 61                    | 101          |
| A417                 | 6614                         | 212                   | 15                     | 0.66                           | 1.4                         | 0.06429                                     | 2.1                  | 0.485                                       | 3.9                  | 0.05472                                      | 3.3                  | 0.53             | 402                                      | 8                     | 402                                      | 13                    | 401                                       | 74                    | 100          |
| A503                 | 14746                        | 539                   | 38                     | 0.67                           | 0.2                         | 0.06434                                     | 2.1                  | 0.4884                                      | 2.4                  | 0.05505                                      | 1.1                  | 0.87             | 402                                      | 8                     | 404                                      | 8                     | 414                                       | 26                    | 97           |
| A407                 | 7438                         | 272                   | 19                     | 0.54                           | 0.1                         | 0.06439                                     | 2.1                  | 0.4864                                      | 2.7                  | 0.05478                                      | 1.6                  | 0.80             | 402                                      | 8                     | 402                                      | 9                     | 403                                       | 36                    | 100          |
| A487                 | 9341                         | 370                   | 27                     | 0.84                           | 0.7                         | 0.06445                                     | 2.1                  | 0.489                                       | 2.7                  | 0.05502                                      | 1.8                  | 0.76             | 403                                      | 8                     | 404                                      | 9                     | 413                                       | 40                    | 97           |
| A474                 | 4964                         | 180                   | 13                     | 0.75                           | 0.5                         | 0.06463                                     | 2.1                  | 0.4884                                      | 3.2                  | 0.05481                                      | 2.5                  | 0.65             | 404                                      | 8                     | 404                                      | 11                    | 404                                       | 55                    | 100          |
| A428                 | 4752                         | 175                   | 13                     | 0.75                           | 1.2                         | 0.06464                                     | 2.1                  | 0.4883                                      | 3.5                  | 0.05479                                      | 2.8                  | 0.60             | 404                                      | 8                     | 404                                      | 12                    | 404                                       | 63                    | 100          |
| A457                 | 2468                         | 84                    | 6                      | 0.83                           | 0.6                         | 0.06473                                     | 2.1                  | 0.4876                                      | 3.3                  | 0.05464                                      | 2.5                  | 0.64             | 404                                      | 8                     | 403                                      | 11                    | 398                                       | 57                    | 102          |
| A425                 | 16055                        | 555                   | 41                     | 0.82                           | 0.2                         | 0.06488                                     | 2.1                  | 0.49                                        | 2.5                  | 0.05478                                      | 1.3                  | 0.84             | 405                                      | 8                     | 405                                      | 8                     | 403                                       | 30                    | 100          |
| A517                 | 8101                         | 316                   | 22                     | 0.63                           | 0.2                         | 0.06499                                     | 2.1                  | 0.4904                                      | 2.6                  | 0.05472                                      | 1.6                  | 0.80             | 406                                      | 8                     | 405                                      | 9                     | 401                                       | 35                    | 101          |
| A484                 | 11650                        | 452                   | 32                     | 0.63                           | 0.6                         | 0.06508                                     | 2.0                  | 0.4928                                      | 2.7                  | 0.05492                                      | 1.8                  | 0.75             | 406                                      | 8                     | 407                                      | 9                     | 409                                       | 40                    | 99           |

|      |       |     |    |      |      |         |     |        |     |         |     |      |     |    |     |    |     |     |     |
|------|-------|-----|----|------|------|---------|-----|--------|-----|---------|-----|------|-----|----|-----|----|-----|-----|-----|
| A401 | 10094 | 371 | 26 | 0.57 | 0.4  | 0.06512 | 2.1 | 0.4932 | 2.6 | 0.05493 | 1.5 | 0.81 | 407 | 8  | 407 | 9  | 409 | 34  | 99  |
| A460 | 7186  | 270 | 21 | 1.06 | 0.6  | 0.06520 | 2.1 | 0.4926 | 2.8 | 0.0548  | 1.8 | 0.76 | 407 | 8  | 407 | 9  | 404 | 40  | 101 |
| A434 | 4015  | 140 | 10 | 0.91 | 0.2  | 0.06522 | 2.2 | 0.4954 | 3.6 | 0.05508 | 2.9 | 0.60 | 407 | 9  | 409 | 12 | 416 | 65  | 98  |
| A490 | 5092  | 196 | 14 | 0.60 | 0.4  | 0.06527 | 2.2 | 0.4928 | 3.6 | 0.05476 | 2.8 | 0.61 | 408 | 9  | 407 | 12 | 402 | 64  | 101 |
| A482 | 5432  | 202 | 15 | 0.73 | 0.6  | 0.06537 | 2.1 | 0.4958 | 2.9 | 0.05501 | 2.0 | 0.73 | 408 | 8  | 409 | 10 | 413 | 45  | 99  |
| A486 | 1989  | 74  | 5  | 0.68 | 0.1  | 0.06543 | 2.1 | 0.4946 | 3.1 | 0.05483 | 2.3 | 0.68 | 409 | 8  | 408 | 11 | 405 | 51  | 101 |
| A454 | 5952  | 217 | 16 | 0.88 | b.d. | 0.06547 | 2.0 | 0.4967 | 2.5 | 0.05503 | 1.5 | 0.80 | 409 | 8  | 409 | 9  | 413 | 34  | 99  |
| A458 | 1477  | 52  | 4  | 0.73 | 0.3  | 0.06554 | 2.2 | 0.4945 | 4.4 | 0.05473 | 3.8 | 0.50 | 409 | 9  | 408 | 15 | 401 | 85  | 102 |
| A413 | 10667 | 396 | 31 | 1.12 | 0.9  | 0.06570 | 2.1 | 0.4996 | 3.0 | 0.05516 | 2.1 | 0.71 | 410 | 8  | 411 | 10 | 419 | 47  | 98  |
| A469 | 3928  | 146 | 12 | 1.38 | 2.1  | 0.06572 | 2.1 | 0.4982 | 4.5 | 0.05498 | 3.9 | 0.47 | 410 | 8  | 410 | 15 | 411 | 88  | 100 |
| A510 | 5056  | 194 | 18 | 1.79 | 0.1  | 0.06582 | 2.1 | 0.4984 | 2.8 | 0.05492 | 1.9 | 0.74 | 411 | 8  | 411 | 10 | 409 | 42  | 100 |
| A453 | 4445  | 165 | 11 | 0.37 | 0.3  | 0.06601 | 2.1 | 0.5008 | 2.9 | 0.05502 | 2.1 | 0.71 | 412 | 8  | 412 | 10 | 413 | 46  | 100 |
| A481 | 4076  | 152 | 12 | 1.04 | 0.7  | 0.06610 | 2.0 | 0.5006 | 3.2 | 0.05492 | 2.4 | 0.64 | 413 | 8  | 412 | 11 | 409 | 54  | 101 |
| A437 | 7804  | 295 | 22 | 0.84 | 0.6  | 0.06630 | 2.1 | 0.5015 | 2.7 | 0.05487 | 1.7 | 0.77 | 414 | 8  | 413 | 9  | 407 | 38  | 102 |
| A448 | 5204  | 196 | 15 | 1.00 | 2.3  | 0.06632 | 2.1 | 0.5015 | 4.7 | 0.05484 | 4.2 | 0.45 | 414 | 9  | 413 | 16 | 406 | 95  | 102 |
| A429 | 3108  | 116 | 9  | 0.89 | 1.9  | 0.06646 | 2.0 | 0.5015 | 4.4 | 0.05473 | 3.9 | 0.46 | 415 | 8  | 413 | 15 | 401 | 88  | 103 |
| A502 | 4762  | 178 | 13 | 0.77 | 0.7  | 0.06655 | 2.0 | 0.5046 | 2.9 | 0.05499 | 2.1 | 0.70 | 415 | 8  | 415 | 10 | 412 | 46  | 101 |
| A419 | 5969  | 215 | 16 | 0.74 | 1.4  | 0.06659 | 2.1 | 0.5068 | 3.8 | 0.0552  | 3.2 | 0.55 | 416 | 8  | 416 | 13 | 420 | 71  | 99  |
| A451 | 5612  | 185 | 14 | 0.95 | 0.1  | 0.06662 | 2.0 | 0.5054 | 2.9 | 0.05502 | 2.0 | 0.71 | 416 | 8  | 415 | 10 | 413 | 45  | 101 |
| A408 | 9673  | 354 | 28 | 1.01 | 1.3  | 0.06663 | 2.1 | 0.5066 | 3.4 | 0.05515 | 2.6 | 0.62 | 416 | 8  | 416 | 12 | 418 | 59  | 99  |
| A516 | 5595  | 206 | 16 | 0.97 | 0.9  | 0.06673 | 2.1 | 0.5066 | 3.0 | 0.05506 | 2.2 | 0.68 | 416 | 8  | 416 | 10 | 415 | 50  | 100 |
| A509 | 6454  | 226 | 17 | 0.71 | 0.5  | 0.06676 | 2.1 | 0.5054 | 2.9 | 0.0549  | 2.1 | 0.72 | 417 | 9  | 415 | 10 | 408 | 46  | 102 |
| A492 | 6668  | 195 | 15 | 0.83 | 2.2  | 0.06683 | 2.1 | 0.5075 | 4.4 | 0.05508 | 3.8 | 0.48 | 417 | 9  | 417 | 15 | 415 | 85  | 100 |
| A483 | 4916  | 193 | 16 | 1.21 | 0.8  | 0.06694 | 2.1 | 0.5071 | 3.1 | 0.05494 | 2.3 | 0.68 | 418 | 9  | 417 | 11 | 410 | 51  | 102 |
| A424 | 3893  | 143 | 11 | 0.71 | 0.6  | 0.06703 | 2.0 | 0.5104 | 3.6 | 0.05523 | 3.0 | 0.57 | 418 | 8  | 419 | 12 | 422 | 66  | 99  |
| A478 | 11700 | 297 | 24 | 1.18 | 4.1  | 0.06708 | 2.8 | 0.5097 | 9.0 | 0.05511 | 8.5 | 0.31 | 419 | 11 | 418 | 31 | 417 | 191 | 100 |
| A480 | 6006  | 223 | 17 | 0.97 | 0.9  | 0.06715 | 2.1 | 0.5105 | 3.1 | 0.05513 | 2.3 | 0.68 | 419 | 8  | 419 | 11 | 418 | 51  | 100 |
| A476 | 7990  | 285 | 23 | 1.05 | 1.9  | 0.06769 | 2.1 | 0.5165 | 4.2 | 0.05534 | 3.7 | 0.49 | 422 | 8  | 423 | 15 | 426 | 82  | 99  |
| A403 | 10414 | 378 | 29 | 0.80 | 2.3  | 0.06773 | 2.1 | 0.5129 | 4.5 | 0.05493 | 4.0 | 0.47 | 422 | 9  | 420 | 16 | 409 | 89  | 103 |
| A404 | 12096 | 437 | 32 | 0.57 | 0.9  | 0.06799 | 2.1 | 0.5202 | 2.9 | 0.05549 | 2.0 | 0.73 | 424 | 9  | 425 | 10 | 432 | 44  | 98  |
| A455 | 4508  | 162 | 12 | 0.67 | b.d. | 0.06813 | 2.1 | 0.5188 | 2.8 | 0.05523 | 1.9 | 0.75 | 425 | 9  | 424 | 10 | 422 | 41  | 101 |
| A477 | 2924  | 106 | 9  | 1.20 | 2.1  | 0.06857 | 2.2 | 0.5252 | 4.8 | 0.05555 | 4.3 | 0.45 | 428 | 9  | 429 | 17 | 434 | 96  | 98  |

Discordia 406 Ma to 122Ma

|             |               |            |                |            |             |
|-------------|---------------|------------|----------------|------------|-------------|
| A467        | 0.2986        | 4.0        | 0.04112        | 2.5        | 0.63        |
| A511        | 0.3687        | 4.2        | 0.04999        | 2.1        | 0.51        |
| <b>A399</b> | <b>0.3808</b> | <b>3.6</b> | <b>0.05071</b> | <b>2.9</b> | <b>0.80</b> |
| A432        | 0.3859        | 2.7        | 0.05168        | 2.1        | 0.78        |
| A465        | 0.4202        | 4.6        | 0.05551        | 3.1        | 0.67        |
| A415        | 0.4325        | 3.2        | 0.05666        | 2.2        | 0.69        |
| A506        | 0.4288        | 2.8        | 0.05687        | 2.2        | 0.81        |
| A493        | 0.4317        | 4.6        | 0.05747        | 2.2        | 0.47        |
| A504        | 0.4362        | 3.9        | 0.05786        | 2.2        | 0.56        |
| A475        | 0.4489        | 3.0        | 0.05956        | 2.1        | 0.70        |
| A479        | 0.4595        | 4.4        | 0.06152        | 2.2        | 0.49        |
| A436        | 0.4638        | 2.9        | 0.06164        | 2.1        | 0.72        |
| <b>A512</b> | <b>0.4668</b> | <b>3.1</b> | <b>0.06198</b> | <b>2.1</b> | <b>0.66</b> |
| A518        | 0.4708        | 2.4        | 0.06198        | 2.1        | 0.88        |
| A513        | 0.4672        | 3.1        | 0.06211        | 2.1        | 0.67        |
| A411        | 0.471         | 3.0        | 0.06241        | 2.1        | 0.69        |
| A459        | 0.4685        | 3.8        | 0.06245        | 2.1        | 0.56        |
| A414        | 0.465         | 3.0        | 0.06250        | 2.1        | 0.69        |
| A427        | 0.4695        | 3.0        | 0.06254        | 2.1        | 0.69        |
| A501        | 0.4705        | 2.9        | 0.06258        | 2.1        | 0.73        |
| A461        | 0.4712        | 3.2        | 0.06272        | 2.2        | 0.69        |
| A450        | 0.4732        | 3.9        | 0.06315        | 2.1        | 0.55        |

discordant

|      |       |     |    |      |     |         |     |        |     |         |     |      |     |    |     |    |     |    |     |
|------|-------|-----|----|------|-----|---------|-----|--------|-----|---------|-----|------|-----|----|-----|----|-----|----|-----|
| A400 | 4314  | 162 | 13 | 1.38 | 0.0 | 0.06374 | 2.1 | 0.4845 | 3.5 | 0.05513 | 2.8 | 0.61 | 398 | 8  | 401 | 12 | 418 | 62 | 95  |
| A475 | 6429  | 218 | 14 | 0.56 | 0.6 | 0.05956 | 2.1 | 0.4489 | 3.0 | 0.05465 | 2.2 | 0.70 | 373 | 8  | 376 | 10 | 398 | 48 | 94  |
| A518 | 15514 | 620 | 41 | 0.54 | 0.1 | 0.06198 | 2.1 | 0.4708 | 2.4 | 0.05509 | 1.1 | 0.88 | 388 | 8  | 392 | 8  | 416 | 25 | 93  |
| A493 | 8955  | 256 | 19 | 1.09 | 0.9 | 0.05747 | 2.2 | 0.4317 | 4.6 | 0.05448 | 4.0 | 0.47 | 360 | 8  | 364 | 14 | 391 | 91 | 92  |
| A499 | 5817  | 199 | 16 | 1.01 | 0.2 | 0.06498 | 2.1 | 0.5003 | 2.8 | 0.05584 | 1.8 | 0.75 | 406 | 8  | 412 | 9  | 446 | 41 | 91  |
| A435 | 17686 | 403 | 35 | 1.01 | 2.7 | 0.06329 | 2.3 | 0.4849 | 4.5 | 0.05557 | 3.8 | 0.51 | 396 | 9  | 401 | 15 | 435 | 86 | 91  |
| A504 | 3792  | 133 | 8  | 0.33 | 1.0 | 0.05786 | 2.2 | 0.4362 | 3.9 | 0.05468 | 3.2 | 0.56 | 363 | 8  | 368 | 12 | 399 | 72 | 91  |
| A422 | 4728  | 161 | 13 | 1.08 | 0.3 | 0.06741 | 2.1 | 0.5242 | 3.3 | 0.05639 | 2.6 | 0.62 | 421 | 8  | 428 | 12 | 468 | 58 | 90  |
| A511 | 11752 | 482 | 25 | 0.41 | 1.2 | 0.04999 | 2.1 | 0.3687 | 4.2 | 0.0535  | 3.6 | 0.51 | 314 | 7  | 319 | 12 | 350 | 82 | 90  |
| A421 | 4421  | 172 | 13 | 1.12 | 0.1 | 0.06466 | 2.1 | 0.4988 | 3.1 | 0.05595 | 2.3 | 0.67 | 404 | 8  | 411 | 10 | 450 | 51 | 90  |
| A410 | 8041  | 274 | 21 | 0.91 | 0.2 | 0.06554 | 2.2 | 0.5069 | 2.6 | 0.0561  | 1.4 | 0.83 | 409 | 9  | 416 | 9  | 456 | 32 | 90  |
| A463 | 18691 | 635 | 49 | 0.58 | 0.8 | 0.07375 | 2.2 | 0.5677 | 3.5 | 0.05583 | 2.8 | 0.61 | 459 | 10 | 457 | 13 | 446 | 62 | 103 |

|             |              |            |           |             |            |                |            |               |            |                |            |             |            |          |            |           |            |           |           |
|-------------|--------------|------------|-----------|-------------|------------|----------------|------------|---------------|------------|----------------|------------|-------------|------------|----------|------------|-----------|------------|-----------|-----------|
| A414        | 6034         | 224        | 16        | 0.72        | 0.5        | 0.06250        | 2.1        | 0.465         | 3.0        | 0.05395        | 2.2        | 0.69        | 391        | 8        | 388        | 10        | 369        | 48        | 106       |
| A505        | 13363        | 400        | 33        | 0.91        | 0.8        | 0.07266        | 2.5        | 0.5747        | 4.5        | 0.05736        | 3.7        | 0.56        | 452        | 11       | 461        | 17        | 506        | 82        | 89        |
| A506        | 9177         | 352        | 23        | 0.81        | 0.3        | 0.05687        | 2.2        | 0.4288        | 2.8        | 0.05468        | 1.6        | 0.81        | 357        | 8        | 362        | 8         | 399        | 37        | 89        |
| A488        | 8247         | 294        | 25        | 1.41        | 0.3        | 0.06600        | 2.1        | 0.5118        | 2.9        | 0.05624        | 2.0        | 0.73        | 412        | 8        | 420        | 10        | 462        | 43        | 89        |
| A426        | 3517         | 127        | 9         | 0.76        | 0.2        | 0.06319        | 2.1        | 0.4858        | 2.9        | 0.05576        | 2.0        | 0.72        | 395        | 8        | 402        | 10        | 443        | 45        | 89        |
| A409        | 8736         | 237        | 21        | 1.03        | 1.1        | 0.07168        | 2.1        | 0.5657        | 3.2        | 0.05724        | 2.4        | 0.65        | 446        | 9        | 455        | 12        | 501        | 53        | 89        |
| A405        | 5335         | 252        | 12        | 0.00        | 0.0        | 0.05246        | 2.1        | 0.3914        | 2.8        | 0.05411        | 1.8        | 0.76        | 330        | 7        | 335        | 8         | 376        | 41        | 88        |
| A423        | 3476         | 120        | 9         | 0.77        | 0.2        | 0.06412        | 2.2        | 0.4979        | 3.0        | 0.05632        | 2.1        | 0.72        | 401        | 8        | 410        | 10        | 465        | 45        | 86        |
| A406        | 15820        | 479        | 36        | 0.95        | 1.0        | 0.06326        | 2.2        | 0.4899        | 2.9        | 0.05617        | 1.9        | 0.76        | 395        | 8        | 405        | 10        | 459        | 41        | 86        |
| A432        | 12747        | 453        | 28        | 0.83        | 0.8        | 0.05168        | 2.1        | 0.3859        | 2.7        | 0.05416        | 1.7        | 0.78        | 325        | 7        | 331        | 8         | 378        | 39        | 86        |
| A465        | 25200        | 699        | 46        | 0.53        | 2.6        | 0.05551        | 3.1        | 0.4202        | 4.6        | 0.05491        | 3.4        | 0.67        | 348        | 10       | 356        | 14        | 408        | 76        | 85        |
| A415        | 16336        | 492        | 32        | 0.74        | 1.0        | 0.05666        | 2.2        | 0.4325        | 3.2        | 0.05537        | 2.3        | 0.69        | 355        | 8        | 365        | 10        | 427        | 51        | 83        |
| A467        | 23531        | 813        | 40        | 0.49        | 1.6        | 0.04112        | 2.5        | 0.2986        | 4.0        | 0.05266        | 3.1        | 0.63        | 260        | 6        | 265        | 9         | 314        | 70        | 83        |
| <b>A399</b> | <b>10474</b> | <b>311</b> | <b>18</b> | <b>0.75</b> | <b>1.6</b> | <b>0.05071</b> | <b>2.9</b> | <b>0.3808</b> | <b>3.6</b> | <b>0.05445</b> | <b>2.2</b> | <b>0.80</b> | <b>319</b> | <b>9</b> | <b>328</b> | <b>10</b> | <b>390</b> | <b>48</b> | <b>82</b> |
| A449        | 8146         | 220        | 15        | 1.18        | 1.8        | 0.05929        | 2.5        | 0.4593        | 3.6        | 0.05618        | 2.6        | 0.69        | 371        | 9        | 384        | 12        | 459        | 58        | 81        |
| A491        | 28986        | 796        | 53        | 0.47        | 2.7        | 0.06245        | 2.7        | 0.4917        | 3.8        | 0.05711        | 2.7        | 0.70        | 390        | 10       | 406        | 13        | 496        | 60        | 79        |
| A464        | 17014        | 467        | 24        | 0.53        | 2.8        | 0.03888        | 3.3        | 0.2855        | 4.4        | 0.05326        | 2.9        | 0.75        | 246        | 8        | 255        | 10        | 340        | 67        | 72        |
| A445        | 9766         | 324        | 17        | 1.09        | 2.2        | 0.04197        | 2.1        | 0.3125        | 3.5        | 0.054          | 2.8        | 0.60        | 265        | 6        | 276        | 9         | 371        | 64        | 71        |
| A515        | 28207        | 688        | 41        | 0.69        | 4.2        | 0.05201        | 2.3        | 0.4044        | 4.7        | 0.05638        | 4.1        | 0.49        | 327        | 7        | 345        | 14        | 468        | 90        | 70        |
| A507        | 13721        | 227        | 21        | 1.38        | 4.8        | 0.06682        | 2.2        | 0.553         | 4.5        | 0.06002        | 3.9        | 0.48        | 417        | 9        | 447        | 16        | 604        | 85        | 69        |
| A446        | 56090        | 1349       | 76        | 0.30        | 4.9        | 0.05219        | 2.8        | 0.4093        | 4.9        | 0.05688        | 4.1        | 0.56        | 328        | 9        | 348        | 15        | 487        | 91        | 67        |
| A462        | 39676        | 1057       | 53        | 0.40        | 4.2        | 0.04578        | 2.6        | 0.3518        | 4.5        | 0.05573        | 3.7        | 0.58        | 289        | 7        | 306        | 12        | 442        | 81        | 65        |
| A431        | 15576        | 629        | 24        | 0.51        | 2.8        | 0.03177        | 3.3        | 0.2304        | 4.6        | 0.0526         | 3.3        | 0.70        | 202        | 6        | 211        | 9         | 312        | 75        | 65        |
| A519        | 29538        | 373        | 46        | 0.19        | 8.3        | 0.06705        | 2.6        | 0.5705        | 5.6        | 0.06171        | 4.9        | 0.46        | 418        | 10       | 458        | 21        | 664        | 106       | 63        |
| A452        | 10291        | 157        | 9         | 0.53        | 6.7        | 0.04360        | 3.2        | 0.34          | 5.8        | 0.05657        | 4.8        | 0.56        | 275        | 9        | 297        | 15        | 475        | 107       | 58        |
| A438        | 35837        | 1099       | 40        | 0.28        | 5.3        | 0.03025        | 6.4        | 0.223         | 7.9        | 0.05347        | 4.6        | 0.81        | 192        | 12       | 204        | 15        | 349        | 105       | 55        |
| A418        | 17942        | 630        | 41        | 0.41        | 3.6        | 0.05675        | 2.4        | 0.4893        | 6.1        | 0.06254        | 5.7        | 0.38        | 356        | 8        | 404        | 21        | 693        | 121       | 51        |
| A416        | 74478        | 1316       | 61        | 0.36        | 14.6       | 0.03447        | 2.8        | 0.2874        | 6.6        | 0.06046        | 5.9        | 0.42        | 218        | 6        | 257        | 15        | 620        | 128       | 35        |
| A430        | 32078        | 1181       | 28        | 0.22        | 6.2        | 0.01446        | 4.2        | 0.1035        | 6.0        | 0.05194        | 4.3        | 0.70        | 93         | 4        | 100        | 6         | 283        | 98        | 33        |
| A433        | 25604        | 1659       | 26        | 0.24        | 4.8        | 0.01134        | 5.9        | 0.07958       | 7.1        | 0.05088        | 4.1        | 0.82        | 73         | 4        | 78         | 5         | 236        | 95        | 31        |
| A456        | 66183        | 1604       | 66        | 0.22        | 7.1        | 0.03475        | 3.4        | 0.3102        | 9.4        | 0.06474        | 8.7        | 0.36        | 220        | 7        | 274        | 23        | 766        | 184       | 29        |
| A471        | 210554       | 702        | 189       | 0.57        | b.d.       | 0.14580        | 2.7        | 7.844         | 4.9        | 0.3903         | 4.1        | 0.55        | 877        | 22       | 2213       | 45        | 3872       | 62        | 23        |
| A444        | 35729        | 2075       | 37        | 0.08        | 10.1       | 0.01350        | 2.8        | 0.1012        | 6.3        | 0.05433        | 5.6        | 0.44        | 86         | 2        | 98         | 6         | 385        | 126       | 22        |
| A402        | 16840        | 412        | 26        | 1.01        | 0.0        | 0.04632        | 2.5        | 0.6501        | 3.0        | 0.1018         | 1.7        | 0.83        | 292        | 7        | 509        | 12        | 1657       | 32        | 18        |
| A472        | 52349        | 1460       | 65        | 0.06        | b.d.       | 0.03276        | 3.0        | 0.7042        | 3.0        | 0.1559         | 0.7        | 0.98        | 208        | 6        | 541        | 13        | 2411       | 11        | 9         |

|      |        |     |     |      |      |         |     |        |      |         |     |      |      |     |      |     |      |     |     |
|------|--------|-----|-----|------|------|---------|-----|--------|------|---------|-----|------|------|-----|------|-----|------|-----|-----|
| A420 | 301689 | 64  | 274 | 0.25 | 42.5 | 2.23500 | 7.9 | 212.2  | 11.1 | 0.6888  | 7.8 | 0.71 | 7568 | 361 | 5445 | 119 | 4708 | 112 | 161 |
| A520 | 6166   | 217 | 16  | 0.75 | 0.8  | 0.06741 | 2.1 | 0.5055 | 3.7  | 0.05438 | 3.0 | 0.57 | 421  | 9   | 415  | 13  | 387  | 68  | 109 |
