# Supplementary material for: Provenance of lower Palaeozoic metasediments of the East Odenwald (Mid-German-Crystalline Zone, Variscides)—a correlation with the East European Platform (Poland)
Source: Springer Nature journal article supplement (doi:10.1007/s00531-021-02103-y), 2021-09-21
Supplement: MOESM4 [file 531_2021_2103_MOESM4_ESM.pdf]

| grain        | $^{207}\text{Pb}^a$<br>(cps) | $\text{U}^b$<br>(ppm) | $\text{Pb}^b$<br>(ppm) | $\frac{\text{Th}^b}{\text{U}}$ | $^{206}\text{Pb}^c$<br>(%) | $\frac{^{206}\text{Pb}^d}{^{238}\text{U}}$ | $\pm 2\sigma$<br>(%) | $\frac{^{207}\text{Pb}^d}{^{235}\text{U}}$ | $\pm 2\sigma$<br>(%) | $\frac{^{207}\text{Pb}^d}{^{206}\text{Pb}}$ | $\pm 2\sigma$<br>(%) | $\rho^e$ | $\frac{^{206}\text{Pb}}{^{238}\text{U}}$<br>(Ma) | $\pm 2\sigma$<br>(Ma) | $\frac{^{207}\text{Pb}}{^{235}\text{U}}$<br>(Ma) | $\pm 2\sigma$<br>(Ma) | $\frac{^{207}\text{Pb}}{^{206}\text{Pb}}$<br>(Ma) | $\pm 2\sigma$<br>(Ma) | conc.<br>(%) |
|--------------|------------------------------|-----------------------|------------------------|--------------------------------|----------------------------|--------------------------------------------|----------------------|--------------------------------------------|----------------------|---------------------------------------------|----------------------|----------|--------------------------------------------------|-----------------------|--------------------------------------------------|-----------------------|---------------------------------------------------|-----------------------|--------------|
| <b>Do556</b> |                              |                       |                        |                                |                            |                                            |                      |                                            |                      |                                             |                      |          |                                                  |                       |                                                  |                       |                                                   |                       |              |
| A380         | 128476                       | 2857                  | 54                     | 1.75                           | 34.1                       | 0.00835                                    | 4.4                  | 0.0629                                     | 13.3                 | 0.05464                                     | 12.5                 | 0.33     | 54                                               | 2                     | 62                                               | 8                     | 398                                               | 281                   | 13           |
| A422         | 39295                        | 1414                  | 25                     | 2.08                           | 11.2                       | 0.01202                                    | 3.7                  | 0.0902                                     | 9.9                  | 0.05442                                     | 9.2                  | 0.38     | 77                                               | 3                     | 88                                               | 8                     | 389                                               | 206                   | 20           |
| A359         | 49188                        | 774                   | 28                     | 1.86                           | 13.7                       | 0.02487                                    | 2.7                  | 0.1993                                     | 6.5                  | 0.05812                                     | 5.9                  | 0.41     | 158                                              | 4                     | 185                                              | 11                    | 534                                               | 130                   | 30           |
| A362         | 46354                        | 1223                  | 37                     | 1.65                           | 8.0                        | 0.02500                                    | 2.3                  | 0.1888                                     | 5.7                  | 0.05476                                     | 5.2                  | 0.40     | 159                                              | 4                     | 176                                              | 9                     | 402                                               | 117                   | 40           |
| A405         | 57096                        | 1049                  | 39                     | 1.50                           | 10.3                       | 0.02667                                    | 2.6                  | 0.2132                                     | 8.2                  | 0.05800                                     | 7.8                  | 0.32     | 170                                              | 4                     | 196                                              | 15                    | 530                                               | 170                   | 32           |
| A355         | 70818                        | 486                   | 19                     | 0.92                           | 11.0                       | 0.02895                                    | 2.8                  | 0.2295                                     | 6.1                  | 0.05749                                     | 5.4                  | 0.46     | 184                                              | 5                     | 210                                              | 12                    | 510                                               | 119                   | 36           |
| A374         | 49933                        | 922                   | 38                     | 2.11                           | 10.0                       | 0.03114                                    | 3.8                  | 0.2454                                     | 6.7                  | 0.05716                                     | 5.5                  | 0.56     | 198                                              | 7                     | 223                                              | 13                    | 498                                               | 122                   | 40           |
| A360         | 8491                         | 279                   | 15                     | 1.16                           | 0.9                        | 0.05005                                    | 2.4                  | 0.3744                                     | 3.7                  | 0.05425                                     | 2.8                  | 0.65     | 315                                              | 7                     | 323                                              | 10                    | 382                                               | 63                    | 83           |
| A395         | 10684                        | 361                   | 19                     | 0.35                           | b.d.                       | 0.05268                                    | 1.6                  | 0.3922                                     | 2.2                  | 0.05400                                     | 1.5                  | 0.75     | 331                                              | 5                     | 336                                              | 6                     | 371                                               | 33                    | 89           |
| A390         | 18382                        | 595                   | 31                     | 0.23                           | 0.3                        | 0.05356                                    | 2.2                  | 0.4025                                     | 2.7                  | 0.05450                                     | 1.6                  | 0.80     | 336                                              | 7                     | 343                                              | 8                     | 392                                               | 37                    | 86           |
| A408         | 13347                        | 334                   | 20                     | 0.46                           | 0.8                        | 0.05929                                    | 2.8                  | 0.4545                                     | 3.8                  | 0.05560                                     | 2.6                  | 0.73     | 371                                              | 10                    | 380                                              | 12                    | 436                                               | 58                    | 85           |
| A389         | 23543                        | 430                   | 28                     | 0.52                           | 3.9                        | 0.06226                                    | 2.4                  | 0.4682                                     | 11.9                 | 0.05454                                     | 11.7                 | 0.20     | 389                                              | 9                     | 390                                              | 39                    | 394                                               | 262                   | 99           |
| A403         | 28372                        | 345                   | 25                     | 0.56                           | 8.1                        | 0.06338                                    | 2.2                  | 0.4800                                     | 11.6                 | 0.05493                                     | 11.4                 | 0.19     | 396                                              | 8                     | 398                                              | 39                    | 409                                               | 255                   | 97           |
| A402         | 14309                        | 499                   | 31                     | 0.24                           | 0.8                        | 0.06409                                    | 1.7                  | 0.4824                                     | 2.7                  | 0.05460                                     | 2.2                  | 0.62     | 400                                              | 7                     | 400                                              | 9                     | 396                                               | 48                    | 101          |
| A388         | 31964                        | 565                   | 42                     | 0.66                           | 5.6                        | 0.06813                                    | 2.4                  | 0.5207                                     | 9.7                  | 0.05542                                     | 9.4                  | 0.25     | 425                                              | 10                    | 426                                              | 34                    | 429                                               | 209                   | 99           |
