# Supplementary material for: Provenance of lower Palaeozoic metasediments of the East Odenwald (Mid-German-Crystalline Zone, Variscides)—a correlation with the East European Platform (Poland)
Source: Springer Nature journal article supplement (doi:10.1007/s00531-021-02103-y), 2021-09-21
Supplement: MOESM5 [file 531_2021_2103_MOESM5_ESM.pdf]

|      |       |     |    |      |      |         |     |        |     |         |     |      |     |    |     |    |     |     |     |
|------|-------|-----|----|------|------|---------|-----|--------|-----|---------|-----|------|-----|----|-----|----|-----|-----|-----|
| A182 | 24980 | 475 | 58 | 1.60 | 4.8  | 0.09431 | 1.7 | 0.7751 | 7.6 | 0.05961 | 7.4 | 0.23 | 581 | 10 | 583 | 34 | 589 | 160 | 99  |
| A188 | 3579  | 63  | 7  | 0.78 | 0.3  | 0.09448 | 1.7 | 0.7719 | 3.4 | 0.05925 | 3.0 | 0.51 | 582 | 10 | 581 | 15 | 576 | 64  | 101 |
| A151 | 3660  | 59  | 7  | 1.09 | 0.3  | 0.09527 | 2.0 | 0.7868 | 2.8 | 0.0599  | 2.0 | 0.71 | 587 | 11 | 589 | 13 | 600 | 43  | 98  |
| A160 | 23721 | 300 | 27 | 0.03 | 1.2  | 0.09598 | 2.1 | 0.8143 | 2.8 | 0.06153 | 1.9 | 0.73 | 591 | 12 | 605 | 13 | 658 | 41  | 90  |
| A311 | 7648  | 126 | 14 | 0.76 | 0.1  | 0.09725 | 1.7 | 0.8095 | 2.3 | 0.06037 | 1.6 | 0.73 | 598 | 10 | 602 | 11 | 617 | 35  | 97  |
| A219 | 15750 | 271 | 30 | 0.85 | 0.0  | 0.09747 | 1.7 | 0.8184 | 2.3 | 0.06089 | 1.7 | 0.70 | 600 | 9  | 607 | 11 | 636 | 36  | 94  |
| A281 | 6726  | 118 | 13 | 0.85 | 2.8  | 0.09754 | 1.7 | 0.8103 | 5.0 | 0.06025 | 4.7 | 0.34 | 600 | 10 | 603 | 23 | 613 | 101 | 98  |
| A204 | 9586  | 159 | 18 | 0.96 | 2.5  | 0.09766 | 1.6 | 0.8146 | 4.4 | 0.0605  | 4.1 | 0.37 | 601 | 9  | 605 | 20 | 621 | 88  | 97  |
| A206 | 6934  | 124 | 14 | 1.02 | b.d. | 0.09772 | 1.7 | 0.8065 | 2.5 | 0.05986 | 1.9 | 0.67 | 601 | 10 | 600 | 12 | 598 | 41  | 100 |
| A229 | 6848  | 117 | 13 | 0.88 | 0.1  | 0.09787 | 1.6 | 0.8231 | 2.4 | 0.06099 | 1.7 | 0.68 | 602 | 9  | 610 | 11 | 639 | 37  | 94  |
| A277 | 3288  | 57  | 6  | 0.55 | 1.6  | 0.09824 | 1.7 | 0.8166 | 3.9 | 0.06028 | 3.5 | 0.43 | 604 | 10 | 606 | 18 | 614 | 76  | 98  |
| A231 | 8978  | 156 | 19 | 1.25 | b.d. | 0.09850 | 1.7 | 0.8219 | 2.2 | 0.06052 | 1.5 | 0.74 | 606 | 10 | 609 | 10 | 622 | 33  | 97  |
| A335 | 8031  | 123 | 14 | 0.84 | 0.2  | 0.09878 | 2.2 | 0.8354 | 2.7 | 0.06134 | 1.6 | 0.81 | 607 | 13 | 617 | 13 | 651 | 34  | 93  |
| A293 | 11741 | 190 | 21 | 0.76 | 2.7  | 0.09882 | 1.7 | 0.8278 | 4.6 | 0.06076 | 4.3 | 0.37 | 607 | 10 | 612 | 22 | 631 | 93  | 96  |
| A326 | 17806 | 297 | 31 | 0.79 | 0.6  | 0.09892 | 3.1 | 0.8473 | 3.5 | 0.06213 | 1.7 | 0.88 | 608 | 18 | 623 | 16 | 678 | 36  | 90  |
| A183 | 7092  | 125 | 15 | 1.24 | 2.9  | 0.09898 | 1.7 | 0.8289 | 5.0 | 0.06073 | 4.8 | 0.33 | 608 | 10 | 613 | 23 | 630 | 102 | 97  |
| A224 | 8195  | 143 | 18 | 1.58 | b.d. | 0.09976 | 1.6 | 0.8277 | 2.4 | 0.06017 | 1.7 | 0.69 | 613 | 10 | 612 | 11 | 610 | 37  | 101 |
| A175 | 7238  | 104 | 12 | 0.87 | 1.1  | 0.09987 | 1.9 | 0.8531 | 2.6 | 0.06196 | 1.8 | 0.74 | 614 | 11 | 626 | 12 | 673 | 38  | 91  |
| A120 | 7470  | 131 | 15 | 0.92 | 0.1  | 0.10010 | 1.8 | 0.8417 | 2.4 | 0.06099 | 1.6 | 0.76 | 615 | 11 | 620 | 11 | 639 | 34  | 96  |
| A123 | 2853  | 45  | 7  | 2.01 | 1.5  | 0.10020 | 1.7 | 0.833  | 5.6 | 0.06029 | 5.3 | 0.31 | 616 | 10 | 615 | 26 | 614 | 114 | 100 |
| A294 | 3518  | 57  | 7  | 1.13 | 0.2  | 0.10030 | 1.9 | 0.8466 | 2.7 | 0.06123 | 1.9 | 0.71 | 616 | 11 | 623 | 13 | 647 | 41  | 95  |
| A124 | 21661 | 389 | 44 | 0.91 | 3.0  | 0.10040 | 1.8 | 0.8403 | 5.0 | 0.0607  | 4.7 | 0.36 | 617 | 11 | 619 | 23 | 629 | 101 | 98  |
| A303 | 3340  | 56  | 6  | 0.93 | 2.9  | 0.10190 | 1.8 | 0.8435 | 5.6 | 0.06005 | 5.3 | 0.32 | 625 | 11 | 621 | 26 | 605 | 115 | 103 |
| A141 | 4894  | 77  | 9  | 0.96 | 0.1  | 0.10260 | 2.0 | 0.862  | 2.9 | 0.06091 | 2.1 | 0.70 | 630 | 12 | 631 | 14 | 636 | 44  | 99  |
| A265 | 4236  | 65  | 7  | 0.54 | 0.2  | 0.10310 | 1.6 | 0.8804 | 2.5 | 0.06195 | 1.9 | 0.65 | 632 | 10 | 641 | 12 | 672 | 41  | 94  |
| A161 | 29378 | 422 | 52 | 0.84 | 0.1  | 0.10350 | 2.1 | 0.8745 | 2.3 | 0.06125 | 0.9 | 0.92 | 635 | 13 | 638 | 11 | 648 | 20  | 98  |
| A193 | 28976 | 402 | 63 | 5.55 | 5.6  | 0.10410 | 2.4 | 0.9072 | 4.8 | 0.06321 | 4.2 | 0.50 | 638 | 15 | 656 | 24 | 715 | 89  | 89  |
| A234 | 4748  | 73  | 8  | 0.54 | 0.2  | 0.10450 | 1.9 | 0.8972 | 2.8 | 0.06225 | 2.0 | 0.69 | 641 | 12 | 650 | 13 | 683 | 43  | 94  |
| A322 | 4872  | 84  | 10 | 0.79 | 2.1  | 0.10500 | 1.6 | 0.9038 | 4.3 | 0.06242 | 4.0 | 0.38 | 644 | 10 | 654 | 21 | 689 | 85  | 93  |
| A203 | 4363  | 69  | 8  | 0.89 | 2.0  | 0.10550 | 1.7 | 0.8936 | 5.2 | 0.06146 | 4.9 | 0.33 | 646 | 10 | 648 | 25 | 655 | 104 | 99  |
| A251 | 3544  | 65  | 7  | 0.25 | 0.6  | 0.10570 | 2.2 | 0.9091 | 2.7 | 0.0624  | 1.5 | 0.82 | 648 | 14 | 657 | 13 | 688 | 33  | 94  |
| A207 | 14692 | 233 | 28 | 0.86 | 0.1  | 0.10600 | 1.6 | 0.9027 | 1.9 | 0.06175 | 1.0 | 0.85 | 650 | 10 | 653 | 9  | 665 | 22  | 98  |
| A317 | 8644  | 130 | 17 | 1.30 | 3.5  | 0.10630 | 1.7 | 0.9077 | 5.7 | 0.06194 | 5.5 | 0.29 | 651 | 10 | 656 | 28 | 672 | 117 | 97  |
| A297 | 5347  | 78  | 9  | 0.75 | 2.0  | 0.10660 | 1.8 | 0.9095 | 3.9 | 0.06187 | 3.4 | 0.47 | 653 | 11 | 657 | 19 | 670 | 73  | 98  |
| A260 | 7522  | 118 | 16 | 1.55 | 5.4  | 0.10710 | 1.7 | 0.9023 | 8.4 | 0.06108 | 8.2 | 0.21 | 656 | 11 | 653 | 41 | 642 | 177 | 102 |
| A170 | 14084 | 217 | 26 | 0.73 | 0.0  | 0.10820 | 1.7 | 0.9275 | 2.2 | 0.06216 | 1.4 | 0.78 | 662 | 11 | 666 | 11 | 680 | 29  | 97  |

|      |       |     |    |      |      |         |     |        |     |         |     |      |      |    |      |    |      |     |     |
|------|-------|-----|----|------|------|---------|-----|--------|-----|---------|-----|------|------|----|------|----|------|-----|-----|
| A221 | 23786 | 314 | 32 | 0.11 | 0.6  | 0.10840 | 1.9 | 0.9486 | 2.4 | 0.06345 | 1.5 | 0.78 | 664  | 12 | 677  | 12 | 723  | 31  | 92  |
| A210 | 11277 | 171 | 22 | 1.15 | 0.0  | 0.10870 | 1.6 | 0.9337 | 2.1 | 0.06227 | 1.4 | 0.75 | 665  | 10 | 670  | 10 | 683  | 30  | 97  |
| A128 | 4968  | 78  | 9  | 0.80 | 1.9  | 0.10920 | 1.6 | 0.9395 | 3.9 | 0.0624  | 3.5 | 0.43 | 668  | 10 | 673  | 19 | 688  | 74  | 97  |
| A301 | 3867  | 63  | 8  | 1.05 | b.d. | 0.10990 | 1.7 | 0.9419 | 2.8 | 0.06216 | 2.2 | 0.61 | 672  | 11 | 674  | 14 | 680  | 47  | 99  |
| A129 | 5508  | 86  | 10 | 0.54 | 0.0  | 0.11030 | 1.7 | 0.9605 | 2.5 | 0.06319 | 1.8 | 0.69 | 674  | 11 | 684  | 12 | 714  | 38  | 94  |
| A139 | 3152  | 45  | 6  | 1.35 | 0.2  | 0.11040 | 1.8 | 0.9548 | 2.8 | 0.06273 | 2.0 | 0.67 | 675  | 12 | 681  | 14 | 699  | 44  | 97  |
| A140 | 3107  | 49  | 6  | 0.39 | 0.1  | 0.11090 | 1.6 | 0.9403 | 3.6 | 0.06151 | 3.2 | 0.45 | 678  | 11 | 673  | 18 | 657  | 70  | 103 |
| A264 | 4360  | 67  | 8  | 0.74 | 2.6  | 0.11100 | 1.7 | 0.941  | 4.9 | 0.06151 | 4.6 | 0.34 | 678  | 11 | 673  | 24 | 657  | 99  | 103 |
| A299 | 7161  | 105 | 12 | 0.62 | 1.7  | 0.11160 | 1.7 | 0.9659 | 3.6 | 0.06277 | 3.2 | 0.46 | 682  | 11 | 686  | 18 | 700  | 69  | 97  |
| A214 | 32569 | 493 | 57 | 0.50 | 1.4  | 0.11230 | 1.6 | 0.9648 | 2.8 | 0.06231 | 2.3 | 0.58 | 686  | 11 | 686  | 14 | 685  | 48  | 100 |
| A275 | 8770  | 122 | 16 | 1.01 | 3.2  | 0.11230 | 1.6 | 0.9784 | 5.3 | 0.06318 | 5.0 | 0.31 | 686  | 11 | 693  | 27 | 714  | 107 | 96  |
| A271 | 5100  | 75  | 10 | 0.95 | b.d. | 0.11290 | 1.8 | 0.979  | 2.7 | 0.0629  | 2.1 | 0.65 | 689  | 11 | 693  | 14 | 705  | 44  | 98  |
| A126 | 943   | 13  | 2  | 0.87 | 1.5  | 0.11420 | 2.0 | 0.9879 | 6.2 | 0.06273 | 5.8 | 0.32 | 697  | 13 | 698  | 32 | 699  | 124 | 100 |
| A236 | 14209 | 205 | 24 | 0.36 | 1.4  | 0.11520 | 1.6 | 0.9938 | 3.0 | 0.06257 | 2.6 | 0.52 | 703  | 11 | 701  | 15 | 694  | 55  | 101 |
| A202 | 2490  | 37  | 5  | 1.02 | 3.2  | 0.11610 | 1.7 | 1.013  | 6.1 | 0.06326 | 5.8 | 0.29 | 708  | 12 | 710  | 32 | 717  | 124 | 99  |
| A262 | 11706 | 156 | 18 | 0.22 | 0.7  | 0.11780 | 1.6 | 1.041  | 2.3 | 0.0641  | 1.6 | 0.72 | 718  | 11 | 724  | 12 | 745  | 33  | 96  |
| A199 | 10382 | 144 | 17 | 0.39 | 0.1  | 0.11790 | 1.6 | 1.046  | 2.0 | 0.06435 | 1.1 | 0.83 | 718  | 11 | 727  | 10 | 753  | 23  | 95  |
| A270 | 3447  | 47  | 7  | 1.63 | 4.8  | 0.11800 | 1.8 | 1.035  | 7.5 | 0.06361 | 7.3 | 0.24 | 719  | 12 | 721  | 40 | 729  | 155 | 99  |
| A226 | 9566  | 138 | 16 | 0.25 | b.d. | 0.11810 | 1.6 | 1.02   | 2.3 | 0.06266 | 1.7 | 0.69 | 720  | 11 | 714  | 12 | 697  | 36  | 103 |
| A135 | 9757  | 39  | 7  | 0.89 | 16.3 | 0.11880 | 2.4 | 1.042  | 9.2 | 0.0636  | 8.9 | 0.26 | 724  | 16 | 725  | 49 | 728  | 189 | 99  |
| A125 | 11188 | 164 | 33 | 3.36 | 0.2  | 0.12020 | 1.6 | 1.055  | 2.2 | 0.06363 | 1.5 | 0.73 | 732  | 11 | 731  | 12 | 729  | 32  | 100 |
| A143 | 3273  | 46  | 8  | 2.47 | 0.2  | 0.12070 | 1.7 | 1.06   | 3.2 | 0.06373 | 2.7 | 0.52 | 734  | 12 | 734  | 17 | 733  | 58  | 100 |
| A235 | 4859  | 61  | 8  | 0.80 | 1.3  | 0.12100 | 1.7 | 1.09   | 2.7 | 0.06534 | 2.1 | 0.64 | 736  | 12 | 749  | 14 | 785  | 43  | 94  |
| A268 | 8756  | 113 | 14 | 0.45 | 1.7  | 0.12210 | 1.7 | 1.071  | 3.2 | 0.0636  | 2.8 | 0.51 | 743  | 12 | 739  | 17 | 728  | 59  | 102 |
| A145 | 7031  | 95  | 12 | 0.44 | 1.6  | 0.12310 | 2.1 | 1.081  | 3.8 | 0.0637  | 3.1 | 0.56 | 748  | 15 | 744  | 20 | 732  | 66  | 102 |
| A220 | 6047  | 82  | 11 | 0.91 | 2.8  | 0.12320 | 1.7 | 1.085  | 4.8 | 0.06388 | 4.5 | 0.34 | 749  | 12 | 746  | 26 | 738  | 96  | 102 |
| A157 | 5992  | 39  | 7  | 1.43 | 7.2  | 0.12700 | 2.1 | 1.19   | 6.1 | 0.06797 | 5.7 | 0.34 | 771  | 15 | 796  | 34 | 868  | 119 | 89  |
| A267 | 3559  | 43  | 6  | 0.93 | 0.1  | 0.13020 | 1.8 | 1.179  | 2.7 | 0.06569 | 2.1 | 0.65 | 789  | 13 | 791  | 15 | 796  | 43  | 99  |
| A165 | 44356 | 545 | 86 | 0.96 | 4.4  | 0.13900 | 2.2 | 1.282  | 7.0 | 0.06693 | 6.7 | 0.31 | 839  | 17 | 838  | 41 | 836  | 139 | 100 |
| A179 | 16354 | 268 | 37 | 0.32 | 0.2  | 0.14350 | 1.9 | 1.3    | 3.8 | 0.06569 | 3.3 | 0.49 | 864  | 15 | 846  | 22 | 797  | 70  | 109 |
| A256 | 7552  | 45  | 14 | 2.96 | 2.0  | 0.15000 | 2.4 | 1.441  | 3.6 | 0.06966 | 2.7 | 0.66 | 901  | 20 | 906  | 22 | 918  | 56  | 98  |
| A200 | 17070 | 142 | 28 | 1.00 | 2.3  | 0.16830 | 1.6 | 1.756  | 3.4 | 0.07569 | 3.0 | 0.48 | 1003 | 15 | 1029 | 22 | 1087 | 60  | 92  |
| A169 | 6188  | 41  | 10 | 1.26 | 2.7  | 0.20320 | 3.0 | 2.308  | 4.7 | 0.0824  | 3.6 | 0.64 | 1192 | 33 | 1215 | 34 | 1255 | 70  | 95  |
| A321 | 11659 | 70  | 15 | 0.50 | 1.3  | 0.20480 | 1.6 | 2.278  | 2.6 | 0.08068 | 2.0 | 0.63 | 1201 | 18 | 1206 | 18 | 1214 | 39  | 99  |
| A334 | 87113 | 285 | 70 | 0.68 | 3.5  | 0.20870 | 1.8 | 2.523  | 3.2 | 0.08767 | 2.7 | 0.55 | 1222 | 20 | 1279 | 24 | 1375 | 52  | 89  |
| A208 | 15949 | 71  | 21 | 1.20 | 2.3  | 0.23500 | 1.7 | 3.051  | 3.2 | 0.09417 | 2.7 | 0.54 | 1361 | 21 | 1421 | 25 | 1511 | 50  | 90  |

|      |        |     |     |      |      |         |     |       |     |         |     |      |      |    |      |    |      |     |     |
|------|--------|-----|-----|------|------|---------|-----|-------|-----|---------|-----|------|------|----|------|----|------|-----|-----|
| A205 | 45386  | 195 | 52  | 0.75 | 1.3  | 0.24190 | 1.7 | 2.763 | 2.5 | 0.08285 | 1.8 | 0.68 | 1396 | 21 | 1346 | 19 | 1266 | 36  | 110 |
| A345 | 38116  | 98  | 27  | 0.48 | 1.6  | 0.25400 | 1.8 | 3.289 | 2.8 | 0.0939  | 2.1 | 0.66 | 1459 | 24 | 1478 | 22 | 1506 | 40  | 97  |
| A319 | 7652   | 31  | 10  | 1.39 | 3.6  | 0.25960 | 1.7 | 3.396 | 4.3 | 0.09488 | 4.0 | 0.39 | 1488 | 22 | 1503 | 35 | 1526 | 75  | 98  |
| A339 | 94535  | 230 | 63  | 0.34 | 2.8  | 0.26010 | 1.8 | 3.592 | 2.9 | 0.1001  | 2.2 | 0.63 | 1490 | 25 | 1548 | 23 | 1627 | 42  | 92  |
| A213 | 14049  | 59  | 20  | 1.62 | 0.2  | 0.26080 | 1.7 | 3.38  | 2.3 | 0.09401 | 1.5 | 0.75 | 1494 | 23 | 1500 | 18 | 1508 | 28  | 99  |
| A295 | 11110  | 47  | 17  | 1.98 | b.d. | 0.26120 | 1.7 | 3.345 | 2.3 | 0.09289 | 1.5 | 0.75 | 1496 | 23 | 1492 | 18 | 1486 | 29  | 101 |
| A269 | 17527  | 75  | 22  | 0.70 | 1.8  | 0.26140 | 1.6 | 3.403 | 2.6 | 0.0944  | 2.1 | 0.60 | 1497 | 21 | 1505 | 21 | 1516 | 40  | 99  |
| A291 | 1595   | 6   | 2   | 1.39 | 0.3  | 0.26370 | 1.9 | 3.46  | 4.5 | 0.09516 | 4.1 | 0.42 | 1509 | 26 | 1518 | 36 | 1531 | 77  | 99  |
| A261 | 19231  | 83  | 29  | 1.79 | 4.6  | 0.26450 | 1.7 | 3.431 | 5.0 | 0.09407 | 4.6 | 0.35 | 1513 | 23 | 1512 | 40 | 1510 | 88  | 100 |
| A155 | 13608  | 59  | 20  | 1.33 | b.d. | 0.26820 | 1.7 | 3.512 | 2.2 | 0.095   | 1.5 | 0.75 | 1531 | 23 | 1530 | 18 | 1528 | 28  | 100 |
| A243 | 15193  | 47  | 14  | 0.46 | 2.0  | 0.27400 | 1.8 | 3.944 | 3.1 | 0.1044  | 2.5 | 0.57 | 1561 | 24 | 1623 | 25 | 1704 | 46  | 92  |
| A186 | 86268  | 279 | 78  | 0.22 | 1.8  | 0.28010 | 1.7 | 3.829 | 2.3 | 0.09915 | 1.6 | 0.72 | 1592 | 24 | 1599 | 19 | 1608 | 30  | 99  |
| A122 | 169606 | 779 | 216 | 0.16 | 1.6  | 0.28180 | 3.6 | 4.03  | 3.9 | 0.1037  | 1.6 | 0.91 | 1600 | 51 | 1640 | 32 | 1692 | 29  | 95  |
| A130 | 10677  | 43  | 16  | 1.38 | 6.9  | 0.29220 | 1.8 | 4.135 | 8.3 | 0.1026  | 8.1 | 0.22 | 1653 | 26 | 1661 | 70 | 1672 | 150 | 99  |
| A237 | 17116  | 53  | 18  | 0.90 | 1.8  | 0.29750 | 2.0 | 4.315 | 2.9 | 0.1052  | 2.0 | 0.71 | 1679 | 30 | 1696 | 24 | 1718 | 37  | 98  |
| A216 | 3450   | 13  | 5   | 1.17 | b.d. | 0.29790 | 2.0 | 4.14  | 3.0 | 0.1008  | 2.3 | 0.65 | 1681 | 29 | 1662 | 25 | 1639 | 43  | 103 |
| A127 | 26246  | 79  | 28  | 0.78 | 1.9  | 0.30590 | 1.7 | 4.758 | 2.5 | 0.1128  | 1.9 | 0.66 | 1721 | 25 | 1777 | 21 | 1845 | 34  | 93  |
| A201 | 14272  | 43  | 17  | 1.09 | 3.2  | 0.31880 | 1.8 | 4.727 | 3.6 | 0.1075  | 3.1 | 0.50 | 1784 | 28 | 1772 | 31 | 1758 | 57  | 101 |
| A176 | 74162  | 188 | 65  | 0.47 | 1.1  | 0.32330 | 1.6 | 5.063 | 2.0 | 0.1136  | 1.2 | 0.80 | 1806 | 26 | 1830 | 17 | 1857 | 22  | 97  |
| A142 | 8123   | 25  | 9   | 0.79 | 1.8  | 0.32370 | 1.8 | 4.858 | 3.0 | 0.1088  | 2.4 | 0.61 | 1808 | 29 | 1795 | 26 | 1780 | 43  | 102 |
| A296 | 37165  | 82  | 34  | 1.18 | 2.6  | 0.33170 | 1.6 | 4.899 | 2.8 | 0.1071  | 2.3 | 0.57 | 1847 | 26 | 1802 | 24 | 1751 | 43  | 105 |
| A308 | 30150  | 77  | 31  | 0.96 | 2.5  | 0.34080 | 1.6 | 5.455 | 2.7 | 0.1161  | 2.2 | 0.59 | 1891 | 26 | 1894 | 24 | 1897 | 40  | 100 |
| A228 | 53940  | 164 | 68  | 1.17 | 3.9  | 0.34270 | 1.7 | 5.104 | 3.8 | 0.108   | 3.4 | 0.45 | 1900 | 28 | 1837 | 33 | 1767 | 62  | 108 |
| A173 | 35366  | 79  | 32  | 0.96 | 2.1  | 0.34270 | 1.6 | 5.409 | 2.7 | 0.1145  | 2.1 | 0.60 | 1900 | 27 | 1886 | 23 | 1871 | 38  | 102 |
| A314 | 30016  | 69  | 26  | 0.57 | 1.3  | 0.34530 | 1.6 | 5.453 | 2.1 | 0.1145  | 1.4 | 0.75 | 1912 | 26 | 1893 | 18 | 1872 | 25  | 102 |
| A215 | 104952 | 216 | 84  | 0.51 | 1.2  | 0.35660 | 2.2 | 5.829 | 2.5 | 0.1185  | 1.3 | 0.86 | 1966 | 37 | 1951 | 22 | 1934 | 23  | 102 |
| A162 | 38408  | 78  | 30  | 0.27 | 0.7  | 0.36480 | 1.6 | 6.555 | 2.0 | 0.1303  | 1.2 | 0.80 | 2005 | 28 | 2053 | 18 | 2102 | 21  | 95  |
| A174 | 145452 | 329 | 150 | 1.18 | b.d. | 0.36710 | 1.7 | 6.404 | 1.8 | 0.1265  | 0.6 | 0.93 | 2016 | 29 | 2033 | 16 | 2050 | 11  | 98  |
| A153 | 60793  | 130 | 55  | 0.58 | 1.6  | 0.38330 | 1.6 | 6.93  | 2.1 | 0.1311  | 1.4 | 0.76 | 2092 | 29 | 2102 | 19 | 2113 | 24  | 99  |
| A154 | 61269  | 122 | 56  | 0.83 | 2.3  | 0.38990 | 1.7 | 7.246 | 2.5 | 0.1348  | 1.9 | 0.67 | 2122 | 31 | 2142 | 23 | 2161 | 32  | 98  |
| A312 | 53836  | 57  | 33  | 1.13 | 7.9  | 0.39030 | 1.9 | 7.107 | 4.3 | 0.1321  | 3.9 | 0.44 | 2124 | 35 | 2125 | 39 | 2126 | 68  | 100 |
| A233 | 13288  | 27  | 12  | 0.62 | 1.7  | 0.39110 | 1.8 | 7.147 | 2.6 | 0.1325  | 1.9 | 0.69 | 2128 | 32 | 2130 | 23 | 2132 | 33  | 100 |
| A181 | 42085  | 83  | 39  | 0.90 | 2.2  | 0.39470 | 1.6 | 7.396 | 2.3 | 0.1359  | 1.7 | 0.70 | 2144 | 30 | 2161 | 21 | 2176 | 29  | 99  |
| A172 | 59014  | 122 | 58  | 0.79 | 3.8  | 0.41090 | 2.1 | 7.627 | 3.6 | 0.1346  | 2.9 | 0.60 | 2219 | 40 | 2188 | 33 | 2159 | 50  | 103 |
| A187 | 59122  | 91  | 47  | 1.13 | 2.8  | 0.41330 | 1.7 | 7.586 | 2.6 | 0.1331  | 1.9 | 0.66 | 2230 | 32 | 2183 | 23 | 2140 | 34  | 104 |
| A156 | 31639  | 58  | 29  | 0.60 | 4.1  | 0.42830 | 1.8 | 8.73  | 4.0 | 0.1478  | 3.5 | 0.46 | 2298 | 35 | 2310 | 37 | 2321 | 60  | 99  |

|      |        |     |     |      |      |         |     |       |     |        |     |      |      |    |      |    |      |     |     |
|------|--------|-----|-----|------|------|---------|-----|-------|-----|--------|-----|------|------|----|------|----|------|-----|-----|
| A133 | 134037 | 233 | 123 | 0.96 | 3.4  | 0.43550 | 2.2 | 8.332 | 3.3 | 0.1388 | 2.4 | 0.68 | 2330 | 44 | 2268 | 30 | 2212 | 41  | 105 |
| A347 | 22588  | 23  | 13  | 1.20 | 4.9  | 0.45180 | 2.0 | 9.56  | 6.4 | 0.1534 | 6.1 | 0.32 | 2403 | 41 | 2393 | 61 | 2385 | 103 | 101 |
| A289 | 199808 | 249 | 128 | 0.45 | 0.7  | 0.46210 | 1.6 | 11.05 | 1.8 | 0.1734 | 0.8 | 0.89 | 2449 | 32 | 2527 | 17 | 2591 | 14  | 95  |
| A225 | 201372 | 236 | 116 | 0.15 | 0.4  | 0.46570 | 1.6 | 11.61 | 1.8 | 0.1808 | 0.9 | 0.86 | 2465 | 32 | 2573 | 17 | 2660 | 15  | 93  |
| A258 | 334451 | 350 | 183 | 0.29 | 0.6  | 0.47920 | 1.6 | 12.2  | 1.8 | 0.1841 | 0.7 | 0.92 | 2524 | 34 | 2617 | 17 | 2690 | 11  | 94  |
| A190 | 218295 | 257 | 132 | 0.15 | 0.5  | 0.48760 | 1.7 | 11.99 | 1.8 | 0.1783 | 0.7 | 0.92 | 2560 | 36 | 2604 | 17 | 2637 | 12  | 97  |
| A263 | 192909 | 221 | 122 | 0.52 | 1.2  | 0.48810 | 1.6 | 11.54 | 1.9 | 0.1714 | 1.0 | 0.86 | 2562 | 35 | 2568 | 18 | 2572 | 17  | 100 |
| A230 | 179375 | 208 | 118 | 0.69 | 1.5  | 0.49060 | 1.6 | 11.47 | 1.9 | 0.1695 | 1.1 | 0.83 | 2573 | 34 | 2562 | 18 | 2553 | 18  | 101 |
| A310 | 72697  | 84  | 49  | 0.80 | 1.9  | 0.49180 | 1.7 | 12.2  | 2.1 | 0.18   | 1.3 | 0.78 | 2579 | 36 | 2620 | 20 | 2653 | 22  | 97  |
| A185 | 88605  | 101 | 75  | 2.02 | 4.2  | 0.51350 | 1.7 | 13.2  | 2.7 | 0.1864 | 2.2 | 0.60 | 2672 | 36 | 2694 | 26 | 2711 | 36  | 99  |
| A276 | 130801 | 99  | 73  | 0.74 | 1.5  | 0.60850 | 1.6 | 19.53 | 1.8 | 0.2328 | 0.8 | 0.89 | 3064 | 39 | 3068 | 17 | 3071 | 13  | 100 |
| A273 | 193268 | 102 | 110 | 0.86 | 10.2 | 0.72160 | 2.2 | 29.04 | 6.2 | 0.2919 | 5.8 | 0.35 | 3502 | 60 | 3455 | 63 | 3428 | 90  | 102 |

discordant

|      |        |      |     |      |     |         |     |        |     |         |     |      |      |    |      |    |      |    |    |
|------|--------|------|-----|------|-----|---------|-----|--------|-----|---------|-----|------|------|----|------|----|------|----|----|
| A309 | 17585  | 130  | 19  | 0.35 | 1.8 | 0.13390 | 1.7 | 1.285  | 2.9 | 0.0696  | 2.4 | 0.57 | 810  | 13 | 839  | 17 | 917  | 49 | 88 |
| A320 | 23407  | 250  | 34  | 0.92 | 1.9 | 0.11670 | 2.2 | 1.063  | 3.4 | 0.06608 | 2.6 | 0.64 | 712  | 15 | 736  | 18 | 809  | 55 | 88 |
| A333 | 12929  | 407  | 22  | 0.03 | 0.6 | 0.05792 | 2.5 | 0.4395 | 3.1 | 0.05502 | 1.9 | 0.79 | 363  | 9  | 370  | 10 | 413  | 43 | 88 |
| A144 | 22271  | 111  | 20  | 0.25 | 3.2 | 0.17350 | 3.2 | 1.894  | 4.9 | 0.07916 | 3.7 | 0.65 | 1031 | 30 | 1079 | 33 | 1176 | 73 | 88 |
| A343 | 6674   | 113  | 8   | 0.44 | 0.9 | 0.06848 | 1.6 | 0.5372 | 3.0 | 0.0569  | 2.5 | 0.55 | 427  | 7  | 437  | 11 | 487  | 55 | 88 |
| A342 | 142760 | 4744 | 633 | 8.62 | 0.1 | 0.04810 | 1.6 | 0.3545 | 1.7 | 0.05345 | 0.6 | 0.93 | 303  | 5  | 308  | 5  | 348  | 15 | 87 |
| A346 | 3128   | 43   | 4   | 1.10 | 0.6 | 0.06760 | 1.7 | 0.5297 | 3.2 | 0.05683 | 2.7 | 0.53 | 422  | 7  | 432  | 11 | 485  | 60 | 87 |
| A272 | 10679  | 147  | 12  | 0.14 | 1.7 | 0.08238 | 1.9 | 0.6768 | 3.2 | 0.05958 | 2.5 | 0.61 | 510  | 10 | 525  | 13 | 589  | 55 | 87 |
| A134 | 21253  | 102  | 16  | 0.30 | 4.2 | 0.14280 | 1.9 | 1.423  | 4.0 | 0.07229 | 3.6 | 0.48 | 860  | 15 | 899  | 24 | 994  | 72 | 87 |
| A307 | 11617  | 355  | 24  | 0.35 | 1.0 | 0.07122 | 1.9 | 0.5655 | 3.3 | 0.05758 | 2.7 | 0.58 | 444  | 8  | 455  | 12 | 514  | 58 | 86 |
| A341 | 4484   | 73   | 6   | 0.68 | 1.2 | 0.07061 | 1.9 | 0.5597 | 2.7 | 0.05749 | 2.0 | 0.69 | 440  | 8  | 451  | 10 | 510  | 43 | 86 |
| A274 | 10545  | 374  | 18  | 0.01 | 0.3 | 0.05133 | 1.6 | 0.3831 | 2.4 | 0.05413 | 1.8 | 0.67 | 323  | 5  | 329  | 7  | 376  | 40 | 86 |
| A248 | 6592   | 153  | 11  | 0.26 | 1.4 | 0.07048 | 1.8 | 0.5592 | 4.4 | 0.05755 | 4.0 | 0.41 | 439  | 8  | 451  | 16 | 513  | 87 | 86 |
| A159 | 157491 | 398  | 113 | 0.40 | 6.9 | 0.24990 | 1.8 | 3.552  | 4.2 | 0.1031  | 3.8 | 0.43 | 1438 | 23 | 1539 | 34 | 1680 | 70 | 86 |
| A211 | 50404  | 179  | 39  | 1.14 | 4.5 | 0.18860 | 3.8 | 2.197  | 5.0 | 0.08449 | 3.3 | 0.76 | 1114 | 39 | 1180 | 36 | 1304 | 64 | 85 |
| A152 | 12842  | 390  | 21  | 0.09 | 1.2 | 0.05809 | 1.7 | 0.4438 | 2.7 | 0.05541 | 2.0 | 0.65 | 364  | 6  | 373  | 8  | 429  | 45 | 85 |
| A266 | 7818   | 79   | 10  | 0.87 | 3.6 | 0.09796 | 1.9 | 0.853  | 3.9 | 0.06316 | 3.4 | 0.48 | 602  | 11 | 626  | 18 | 714  | 73 | 84 |
| A257 | 31585  | 143  | 23  | 0.33 | 4.6 | 0.13860 | 1.8 | 1.38   | 4.1 | 0.07219 | 3.6 | 0.44 | 837  | 14 | 880  | 24 | 991  | 74 | 84 |
| A131 | 8718   | 168  | 15  | 0.29 | 0.3 | 0.08386 | 2.1 | 0.6982 | 2.8 | 0.06039 | 1.9 | 0.73 | 519  | 10 | 538  | 12 | 617  | 42 | 84 |
| A250 | 13256  | 187  | 15  | 0.09 | 2.3 | 0.08364 | 1.7 | 0.6965 | 3.4 | 0.06039 | 3.0 | 0.50 | 518  | 9  | 537  | 14 | 618  | 64 | 84 |

|      |        |      |     |      |      |         |     |        |      |         |      |      |      |    |      |     |      |     |    |
|------|--------|------|-----|------|------|---------|-----|--------|------|---------|------|------|------|----|------|-----|------|-----|----|
| A255 | 45523  | 259  | 47  | 0.13 | 5.1  | 0.18270 | 2.0 | 2.113  | 4.0  | 0.08391 | 3.4  | 0.52 | 1081 | 20 | 1153 | 28  | 1291 | 66  | 84 |
| A138 | 8136   | 41   | 8   | 1.39 | 7.9  | 0.13200 | 2.2 | 1.294  | 5.4  | 0.07113 | 5.0  | 0.41 | 799  | 17 | 843  | 32  | 961  | 101 | 83 |
| A244 | 11599  | 105  | 13  | 0.17 | 3.6  | 0.11690 | 1.8 | 1.092  | 4.2  | 0.06772 | 3.8  | 0.44 | 713  | 12 | 749  | 23  | 860  | 79  | 83 |
| A340 | 40247  | 330  | 40  | 0.48 | 3.5  | 0.11290 | 3.9 | 1.042  | 5.1  | 0.06696 | 3.2  | 0.77 | 690  | 26 | 725  | 27  | 836  | 67  | 82 |
| A137 | 3338   | 28   | 4   | 1.06 | 5.6  | 0.11030 | 2.1 | 1.014  | 5.1  | 0.06666 | 4.6  | 0.41 | 675  | 14 | 711  | 26  | 827  | 97  | 82 |
| A121 | 19561  | 301  | 25  | 0.33 | 3.4  | 0.07546 | 2.0 | 0.6169 | 4.4  | 0.05929 | 3.9  | 0.45 | 469  | 9  | 488  | 17  | 578  | 85  | 81 |
| A227 | 6739   | 130  | 8   | 0.22 | 2.2  | 0.06557 | 2.4 | 0.5185 | 4.2  | 0.05735 | 3.5  | 0.57 | 409  | 10 | 424  | 15  | 505  | 76  | 81 |
| A292 | 3626   | 94   | 6   | 0.11 | 0.9  | 0.06283 | 1.6 | 0.4923 | 3.1  | 0.05683 | 2.6  | 0.53 | 393  | 6  | 406  | 10  | 485  | 58  | 81 |
| A305 | 7710   | 26   | 5   | 0.50 | 7.2  | 0.14430 | 2.1 | 1.502  | 6.1  | 0.07549 | 5.8  | 0.34 | 869  | 17 | 931  | 38  | 1082 | 116 | 80 |
| A298 | 30212  | 419  | 56  | 1.55 | 1.7  | 0.09805 | 2.0 | 0.8738 | 3.2  | 0.06463 | 2.5  | 0.63 | 603  | 12 | 638  | 15  | 762  | 53  | 79 |
| A280 | 7548   | 93   | 7   | 0.54 | 5.6  | 0.05665 | 2.3 | 0.4377 | 6.0  | 0.05604 | 5.6  | 0.38 | 355  | 8  | 369  | 19  | 454  | 124 | 78 |
| A254 | 41567  | 548  | 54  | 0.17 | 4.7  | 0.10180 | 2.2 | 0.9262 | 4.5  | 0.06596 | 3.9  | 0.50 | 625  | 13 | 666  | 22  | 805  | 82  | 78 |
| A349 | 22839  | 257  | 18  | 0.39 | 2.9  | 0.06814 | 1.8 | 0.5501 | 3.9  | 0.05856 | 3.4  | 0.47 | 425  | 7  | 445  | 14  | 551  | 75  | 77 |
| A166 | 943    | 5    | 1   | 0.88 | 9.0  | 0.10630 | 2.8 | 0.9911 | 6.2  | 0.06763 | 5.5  | 0.46 | 651  | 18 | 699  | 32  | 857  | 115 | 76 |
| A253 | 33703  | 129  | 17  | 0.16 | 21.2 | 0.08220 | 2.9 | 0.7029 | 10.2 | 0.06202 | 9.7  | 0.29 | 509  | 14 | 541  | 43  | 675  | 208 | 75 |
| A344 | 11298  | 245  | 13  | 0.02 | 0.5  | 0.05640 | 2.4 | 0.441  | 3.2  | 0.05671 | 2.2  | 0.73 | 354  | 8  | 371  | 10  | 480  | 49  | 74 |
| A306 | 146580 | 5492 | 705 | 7.89 | 0.1  | 0.04886 | 1.6 | 0.3717 | 1.8  | 0.05517 | 0.8  | 0.90 | 308  | 5  | 321  | 5   | 419  | 17  | 73 |
| A212 | 1748   | 29   | 3   | 0.75 | 3.2  | 0.09297 | 1.7 | 0.84   | 6.5  | 0.06553 | 6.2  | 0.27 | 573  | 10 | 619  | 30  | 791  | 131 | 72 |
| A217 | 8648   | 262  | 15  | 0.12 | 0.0  | 0.05854 | 1.6 | 0.4645 | 2.3  | 0.05755 | 1.7  | 0.69 | 367  | 6  | 387  | 8   | 513  | 37  | 72 |
| A318 | 34791  | 104  | 24  | 0.11 | 1.9  | 0.22470 | 1.9 | 3.536  | 3.0  | 0.1141  | 2.3  | 0.64 | 1307 | 22 | 1535 | 24  | 1866 | 41  | 70 |
| A168 | 4527   | 120  | 7   | 0.15 | 0.2  | 0.06448 | 2.3 | 0.5287 | 4.1  | 0.05947 | 3.4  | 0.56 | 403  | 9  | 431  | 15  | 584  | 74  | 69 |
| A232 | 54390  | 181  | 36  | 0.41 | 3.4  | 0.17450 | 2.4 | 2.301  | 3.7  | 0.09564 | 2.9  | 0.63 | 1037 | 23 | 1212 | 27  | 1541 | 55  | 67 |
| A252 | 38597  | 144  | 18  | 0.18 | 12.0 | 0.09284 | 2.1 | 0.8636 | 5.8  | 0.06746 | 5.4  | 0.37 | 572  | 12 | 632  | 28  | 852  | 113 | 67 |
| A158 | 8757   | 179  | 15  | 0.60 | 1.3  | 0.07220 | 1.8 | 0.6171 | 3.1  | 0.06199 | 2.6  | 0.57 | 449  | 8  | 488  | 12  | 674  | 55  | 67 |
| A132 | 29199  | 258  | 23  | 0.11 | 8.7  | 0.07133 | 2.0 | 0.608  | 5.7  | 0.06182 | 5.4  | 0.35 | 444  | 9  | 482  | 22  | 668  | 115 | 67 |
| A119 | 2779   | 8    | 1   | 0.35 | 14.2 | 0.07201 | 8.4 | 0.6256 | 11.9 | 0.06302 | 8.5  | 0.70 | 448  | 36 | 493  | 48  | 709  | 181 | 63 |
| A338 | 7104   | 26   | 3   | 0.58 | 12.3 | 0.07654 | 2.5 | 0.681  | 6.7  | 0.06453 | 6.2  | 0.37 | 475  | 11 | 527  | 28  | 759  | 131 | 63 |
| A315 | 24555  | 276  | 19  | 0.05 | 8.2  | 0.06057 | 3.2 | 0.5108 | 6.1  | 0.06117 | 5.2  | 0.52 | 379  | 12 | 419  | 21  | 645  | 113 | 59 |
| A327 | 13177  | 428  | 14  | 0.24 | 4.6  | 0.03110 | 3.1 | 0.2303 | 5.0  | 0.0537  | 4.0  | 0.61 | 197  | 6  | 210  | 10  | 359  | 90  | 55 |
| A184 | 4234   | 120  | 3   | 0.21 | 3.1  | 0.02258 | 8.3 | 0.1609 | 9.0  | 0.05166 | 3.6  | 0.92 | 144  | 12 | 151  | 13  | 271  | 81  | 53 |
| A171 | 26705  | 12   | 9   | 0.67 | 50.4 | 0.22280 | 5.6 | 5.355  | 9.6  | 0.1743  | 7.8  | 0.58 | 1296 | 66 | 1878 | 86  | 2600 | 131 | 50 |
| A324 | 26380  | 192  | 28  | 0.23 | 0.9  | 0.13510 | 4.0 | 2.046  | 4.5  | 0.1098  | 2.0  | 0.89 | 817  | 31 | 1131 | 31  | 1797 | 37  | 45 |
| A323 | 25073  | 111  | 28  | 0.20 | 13.7 | 0.19630 | 5.2 | 5.671  | 19.2 | 0.2095  | 18.5 | 0.27 | 1155 | 56 | 1927 | 181 | 2902 | 300 | 40 |
| A218 | 26272  | 334  | 26  | 0.13 | 0.0  | 0.07512 | 2.2 | 0.8676 | 2.7  | 0.08377 | 1.5  | 0.82 | 467  | 10 | 634  | 13  | 1287 | 30  | 36 |
| A336 | 8790   | 296  | 10  | 1.59 | 8.2  | 0.02168 | 3.2 | 0.1625 | 6.1  | 0.05435 | 5.2  | 0.52 | 138  | 4  | 153  | 9   | 385  | 116 | 36 |
| A192 | 18832  | 89   | 11  | 0.39 | 5.3  | 0.09151 | 3.3 | 1.56   | 5.3  | 0.1237  | 4.2  | 0.62 | 564  | 18 | 955  | 33  | 2010 | 74  | 28 |
