# Supplementary material for: Provenance of lower Palaeozoic metasediments of the East Odenwald (Mid-German-Crystalline Zone, Variscides)—a correlation with the East European Platform (Poland)
Source: Springer Nature journal article supplement (doi:10.1007/s00531-021-02103-y), 2021-09-21
Supplement: MOESM6 [file 531_2021_2103_MOESM6_ESM.pdf]

| grain        | $^{207}\text{Pb}^a$<br>(cps) | $\text{U}^b$<br>(ppm) | $\text{Pb}^b$<br>(ppm) | $\text{Th}^b$<br>U | $^{206}\text{Pb}^c$<br>(%) | $\frac{^{206}\text{Pb}^d}{^{238}\text{U}}$<br>(%) | $\pm 2\sigma$<br>(%) | $\frac{^{207}\text{Pb}^d}{^{235}\text{U}}$<br>(%) | $\pm 2\sigma$<br>(%) | $\frac{^{207}\text{Pb}^d}{^{206}\text{Pb}}$<br>(%) | $\pm 2\sigma$<br>(%) | rho <sup>e</sup> | $\frac{^{206}\text{Pb}}{^{238}\text{U}}$<br>(Ma) | $\pm 2\sigma$<br>(Ma) | $\frac{^{207}\text{Pb}}{^{235}\text{U}}$<br>(Ma) | $\pm 2\sigma$<br>(Ma) | $\frac{^{207}\text{Pb}}{^{206}\text{Pb}}$<br>(Ma) | $\pm 2\sigma$<br>(Ma) | conc.<br>(%) |
|--------------|------------------------------|-----------------------|------------------------|--------------------|----------------------------|---------------------------------------------------|----------------------|---------------------------------------------------|----------------------|----------------------------------------------------|----------------------|------------------|--------------------------------------------------|-----------------------|--------------------------------------------------|-----------------------|---------------------------------------------------|-----------------------|--------------|
| <b>Do558</b> |                              |                       |                        |                    |                            |                                                   |                      |                                                   |                      |                                                    |                      |                  |                                                  |                       |                                                  |                       |                                                   |                       |              |
| A342         | 142760                       | 3865                  | 512                    | 6.21               | 0.1                        | 0.04773                                           | 2.3                  | 0.3498                                            | 2.4                  | 0.05315                                            | 0.6                  | 0.96             | 301                                              | 7                     | 305                                              | 6                     | 335                                               | 15                    | 90           |
| A333         | 12929                        | 332                   | 18                     | 0.02               | 0.6                        | 0.05743                                           | 3.0                  | 0.4333                                            | 3.6                  | 0.05472                                            | 1.9                  | 0.84             | 360                                              | 10                    | 366                                              | 11                    | 401                                               | 43                    | 90           |
| A279         | 4247                         | 105                   | 6                      | 0.06               | 0.1                        | 0.05747                                           | 2.4                  | 0.4326                                            | 3.2                  | 0.05459                                            | 2.1                  | 0.76             | 360                                              | 8                     | 365                                              | 10                    | 395                                               | 46                    | 91           |
| A325         | 16475                        | 442                   | 24                     | 0.01               | 0.4                        | 0.05796                                           | 3.0                  | 0.4282                                            | 3.4                  | 0.05358                                            | 1.7                  | 0.87             | 363                                              | 10                    | 362                                              | 10                    | 353                                               | 38                    | 103          |
| A247         | 9028                         | 208                   | 12                     | 0.05               | 0.8                        | 0.06047                                           | 2.4                  | 0.4504                                            | 3.4                  | 0.05403                                            | 2.4                  | 0.71             | 378                                              | 9                     | 378                                              | 11                    | 372                                               | 54                    | 102          |
| A259         | 8755                         | 172                   | 13                     | 0.60               | 0.4                        | 0.06052                                           | 2.6                  | 0.4598363                                         | 3.1                  | 0.0551                                             | 1.6                  | 0.85             | 379                                              | 10                    | 384                                              | 10                    | 416                                               | 36                    | 91           |
| A302         | 9820                         | 188                   | 15                     | 0.34               | 3.9                        | 0.07209                                           | 2.6                  | 0.5653                                            | 7.1                  | 0.05687                                            | 6.6                  | 0.37             | 449                                              | 11                    | 455                                              | 26                    | 487                                               | 146                   | 92           |
| A278         | 9522                         | 142                   | 11                     | 0.23               | 0.5                        | 0.07576                                           | 2.7                  | 0.5923                                            | 3.3                  | 0.0567                                             | 1.9                  | 0.82             | 471                                              | 12                    | 472                                              | 12                    | 480                                               | 41                    | 98           |
| A313         | 12498                        | 194                   | 17                     | 0.40               | 0.2                        | 0.08102                                           | 3.4                  | 0.6551                                            | 3.8                  | 0.05865                                            | 1.7                  | 0.89             | 502                                              | 17                    | 512                                              | 15                    | 554                                               | 37                    | 91           |
| A246         | 8270                         | 139                   | 11                     | 0.24               | 0.2                        | 0.08176                                           | 3.5                  | 0.6632                                            | 4.0                  | 0.05883                                            | 2.0                  | 0.87             | 507                                              | 17                    | 517                                              | 16                    | 561                                               | 44                    | 90           |
| A300         | 6238                         | 75                    | 7                      | 0.38               | 0.9                        | 0.08250                                           | 2.7                  | 0.6619                                            | 4.3                  | 0.05819                                            | 3.3                  | 0.63             | 511                                              | 13                    | 516                                              | 17                    | 537                                               | 73                    | 95           |
| A316         | 20541                        | 284                   | 26                     | 0.54               | 0.6                        | 0.08251                                           | 2.8                  | 0.6711                                            | 3.1                  | 0.05899                                            | 1.5                  | 0.88             | 511                                              | 14                    | 521                                              | 13                    | 567                                               | 33                    | 90           |
| A304         | 7791                         | 120                   | 11                     | 0.39               | 0.2                        | 0.08418                                           | 2.4                  | 0.6823                                            | 2.8                  | 0.05878                                            | 1.5                  | 0.85             | 521                                              | 12                    | 528                                              | 12                    | 559                                               | 32                    | 93           |
| A337         | 14074                        | 221                   | 21                     | 0.50               | 2.7                        | 0.08443                                           | 2.4                  | 0.6907                                            | 5.0                  | 0.05933                                            | 4.5                  | 0.47             | 523                                              | 12                    | 533                                              | 21                    | 579                                               | 97                    | 90           |
| A288         | 13068                        | 198                   | 19                     | 0.47               | 2.1                        | 0.08710                                           | 2.4                  | 0.715                                             | 4.2                  | 0.05954                                            | 3.4                  | 0.57             | 538                                              | 12                    | 548                                              | 18                    | 587                                               | 75                    | 92           |
| A290         | 4699                         | 68                    | 7                      | 0.73               | 0.9                        | 0.08790                                           | 2.4                  | 0.6948                                            | 3.7                  | 0.05733                                            | 2.8                  | 0.65             | 543                                              | 12                    | 536                                              | 15                    | 504                                               | 61                    | 108          |
| A222         | 14342                        | 220                   | 26                     | 1.20               | 0.2                        | 0.09139                                           | 2.3                  | 0.7418                                            | 2.6                  | 0.05886                                            | 1.1                  | 0.90             | 564                                              | 13                    | 563                                              | 11                    | 562                                               | 25                    | 100          |
| A348         | 21979                        | 155                   | 16                     | 0.55               | 0.3                        | 0.09160                                           | 2.5                  | 0.7597                                            | 2.7                  | 0.06015                                            | 1.1                  | 0.92             | 565                                              | 13                    | 574                                              | 12                    | 609                                               | 23                    | 93           |
| A219         | 15750                        | 225                   | 24                     | 0.61               | 0.0                        | 0.09545                                           | 2.4                  | 0.7969                                            | 2.9                  | 0.06055                                            | 1.7                  | 0.82             | 588                                              | 13                    | 595                                              | 13                    | 623                                               | 36                    | 94           |
| A229         | 6848                         | 97                    | 11                     | 0.64               | 0.1                        | 0.09595                                           | 2.3                  | 0.8024                                            | 2.9                  | 0.06065                                            | 1.7                  | 0.80             | 591                                              | 13                    | 598                                              | 13                    | 627                                               | 37                    | 94           |
| A281         | 6726                         | 97                    | 10                     | 0.61               | 2.8                        | 0.09617                                           | 2.4                  | 0.7945                                            | 5.2                  | 0.05992                                            | 4.7                  | 0.46             | 592                                              | 14                    | 594                                              | 24                    | 601                                               | 101                   | 99           |
| A311         | 7648                         | 103                   | 11                     | 0.55               | 0.1                        | 0.09620                                           | 2.4                  | 0.7962                                            | 2.9                  | 0.06003                                            | 1.6                  | 0.83             | 592                                              | 14                    | 595                                              | 13                    | 605                                               | 35                    | 98           |
| A231         | 8978                         | 129                   | 15                     | 0.90               | b.d.                       | 0.09658                                           | 2.4                  | 0.8014                                            | 2.8                  | 0.06018                                            | 1.5                  | 0.84             | 594                                              | 13                    | 598                                              | 13                    | 610                                               | 33                    | 97           |
| A277         | 3288                         | 47                    | 5                      | 0.40               | 1.6                        | 0.09682                                           | 2.4                  | 0.8002                                            | 4.2                  | 0.05994                                            | 3.5                  | 0.56             | 596                                              | 14                    | 597                                              | 19                    | 602                                               | 76                    | 99           |
| A293         | 11741                        | 156                   | 17                     | 0.55               | 2.7                        | 0.09755                                           | 2.4                  | 0.8126                                            | 4.9                  | 0.06042                                            | 4.3                  | 0.49             | 600                                              | 14                    | 604                                              | 23                    | 619                                               | 93                    | 97           |
| A224         | 8195                         | 119                   | 15                     | 1.14               | b.d.                       | 0.09775                                           | 2.3                  | 0.8064                                            | 2.9                  | 0.05983                                            | 1.7                  | 0.80             | 601                                              | 13                    | 600                                              | 13                    | 598                                               | 38                    | 101          |
| A335         | 8031                         | 101                   | 11                     | 0.60               | 0.2                        | 0.09796                                           | 2.8                  | 0.8238                                            | 3.2                  | 0.06099                                            | 1.6                  | 0.87             | 602                                              | 16                    | 610                                              | 15                    | 639                                               | 34                    | 94           |
| A326         | 17806                        | 242                   | 25                     | 0.57               | 0.6                        | 0.09799                                           | 3.5                  | 0.8347                                            | 3.9                  | 0.06178                                            | 1.7                  | 0.90             | 603                                              | 20                    | 616                                              | 18                    | 666                                               | 36                    | 90           |
| A294         | 3518                         | 47                    | 5                      | 0.82               | 0.2                        | 0.09902                                           | 2.6                  | 0.8312                                            | 3.2                  | 0.06088                                            | 1.9                  | 0.80             | 609                                              | 15                    | 614                                              | 15                    | 635                                               | 42                    | 96           |
| A303         | 3340                         | 46                    | 5                      | 0.67               | 2.9                        | 0.10070                                           | 2.4                  | 0.829                                             | 5.9                  | 0.05971                                            | 5.3                  | 0.42             | 618                                              | 14                    | 613                                              | 27                    | 593                                               | 115                   | 104          |
| A265         | 4236                         | 53                    | 6                      | 0.39               | 0.2                        | 0.10140                                           | 2.4                  | 0.8616                                            | 3.0                  | 0.06161                                            | 1.9                  | 0.78             | 623                                              | 14                    | 631                                              | 14                    | 660                                               | 41                    | 94           |
| A234         | 4748                         | 61                    | 7                      | 0.39               | 0.2                        | 0.10250                                           | 2.6                  | 0.8752                                            | 3.2                  | 0.0619                                             | 2.0                  | 0.79             | 629                                              | 15                    | 638                                              | 15                    | 671                                               | 43                    | 94           |

|      |       |     |    |      |      |         |     |        |     |         |     |      |      |    |      |    |      |     |     |
|------|-------|-----|----|------|------|---------|-----|--------|-----|---------|-----|------|------|----|------|----|------|-----|-----|
| A251 | 3544  | 54  | 6  | 0.18 | 0.6  | 0.10380 | 2.8 | 0.8883 | 3.2 | 0.06205 | 1.5 | 0.87 | 637  | 17 | 645  | 15 | 676  | 33  | 94  |
| A322 | 4872  | 68  | 8  | 0.57 | 2.1  | 0.10400 | 2.4 | 0.8901 | 4.6 | 0.06207 | 4.0 | 0.51 | 638  | 14 | 646  | 22 | 677  | 85  | 94  |
| A317 | 8644  | 106 | 14 | 0.94 | 3.5  | 0.10520 | 2.4 | 0.8934 | 6.0 | 0.0616  | 5.5 | 0.40 | 645  | 14 | 648  | 29 | 660  | 118 | 98  |
| A297 | 5347  | 64  | 8  | 0.54 | 2.0  | 0.10530 | 2.5 | 0.8933 | 4.2 | 0.06152 | 3.4 | 0.59 | 645  | 15 | 648  | 20 | 658  | 73  | 98  |
| A260 | 7522  | 98  | 13 | 1.12 | 5.4  | 0.10540 | 2.4 | 0.8826 | 8.6 | 0.06074 | 8.2 | 0.28 | 646  | 15 | 642  | 42 | 630  | 177 | 103 |
| A221 | 23786 | 261 | 26 | 0.08 | 0.6  | 0.10620 | 2.5 | 0.924  | 2.9 | 0.06309 | 1.5 | 0.86 | 651  | 16 | 664  | 14 | 711  | 31  | 91  |
| A301 | 3867  | 51  | 6  | 0.76 | b.d. | 0.10860 | 2.4 | 0.9255 | 3.2 | 0.06182 | 2.2 | 0.74 | 664  | 15 | 665  | 16 | 668  | 47  | 100 |
| A264 | 4360  | 55  | 7  | 0.54 | 2.6  | 0.10920 | 2.4 | 0.9209 | 5.2 | 0.06117 | 4.6 | 0.46 | 668  | 15 | 663  | 25 | 645  | 99  | 104 |
| A214 | 32569 | 410 | 47 | 0.36 | 1.4  | 0.10990 | 2.3 | 0.939  | 3.2 | 0.06196 | 2.3 | 0.72 | 672  | 15 | 672  | 16 | 673  | 48  | 100 |
| A299 | 7161  | 86  | 10 | 0.45 | 1.7  | 0.11030 | 2.4 | 0.9489 | 4.0 | 0.06242 | 3.2 | 0.59 | 674  | 15 | 678  | 20 | 688  | 69  | 98  |
| A275 | 8770  | 101 | 13 | 0.73 | 3.2  | 0.11070 | 2.3 | 0.9586 | 5.5 | 0.06282 | 5.0 | 0.42 | 677  | 15 | 683  | 28 | 702  | 107 | 96  |
| A271 | 5100  | 62  | 8  | 0.68 | b.d. | 0.11120 | 2.4 | 0.9588 | 3.2 | 0.06254 | 2.1 | 0.76 | 680  | 16 | 683  | 16 | 693  | 44  | 98  |
| A236 | 14209 | 170 | 19 | 0.26 | 1.4  | 0.11300 | 2.3 | 0.9695 | 3.5 | 0.06222 | 2.6 | 0.67 | 690  | 15 | 688  | 17 | 682  | 55  | 101 |
| A226 | 9566  | 115 | 13 | 0.18 | b.d. | 0.11570 | 2.3 | 0.9944 | 2.8 | 0.06231 | 1.7 | 0.81 | 706  | 15 | 701  | 15 | 685  | 36  | 103 |
| A262 | 11706 | 129 | 15 | 0.16 | 0.7  | 0.11590 | 2.4 | 1.019  | 2.8 | 0.06374 | 1.6 | 0.83 | 707  | 16 | 713  | 15 | 733  | 33  | 96  |
| A270 | 3447  | 39  | 6  | 1.18 | 4.8  | 0.11620 | 2.4 | 1.013  | 7.7 | 0.06325 | 7.3 | 0.32 | 708  | 16 | 710  | 40 | 717  | 155 | 99  |
| A235 | 4859  | 50  | 7  | 0.57 | 1.3  | 0.11870 | 2.4 | 1.063  | 3.2 | 0.06497 | 2.1 | 0.76 | 723  | 16 | 736  | 17 | 773  | 43  | 94  |
| A268 | 8756  | 93  | 12 | 0.32 | 1.7  | 0.12020 | 2.4 | 1.048  | 3.6 | 0.06324 | 2.8 | 0.65 | 732  | 16 | 728  | 19 | 716  | 59  | 102 |
| A220 | 6047  | 68  | 9  | 0.66 | 2.8  | 0.12070 | 2.4 | 1.057  | 5.1 | 0.06353 | 4.5 | 0.46 | 735  | 16 | 732  | 27 | 726  | 96  | 101 |
| A267 | 3559  | 36  | 5  | 0.67 | 0.1  | 0.12820 | 2.4 | 1.155  | 3.2 | 0.06532 | 2.1 | 0.76 | 778  | 18 | 779  | 18 | 785  | 43  | 99  |
| A256 | 7552  | 37  | 11 | 2.13 | 2.0  | 0.14750 | 2.9 | 1.409  | 4.0 | 0.06927 | 2.7 | 0.73 | 887  | 24 | 893  | 24 | 907  | 56  | 98  |
| A321 | 11659 | 58  | 12 | 0.36 | 1.3  | 0.20280 | 2.3 | 2.243  | 3.1 | 0.08023 | 2.0 | 0.76 | 1190 | 25 | 1195 | 22 | 1203 | 39  | 99  |
| A345 | 38116 | 80  | 22 | 0.34 | 1.6  | 0.25220 | 2.5 | 3.247  | 3.2 | 0.09338 | 2.1 | 0.76 | 1450 | 32 | 1468 | 25 | 1496 | 40  | 97  |
| A213 | 14049 | 49  | 16 | 1.17 | 0.2  | 0.25520 | 2.4 | 3.289  | 2.8 | 0.09349 | 1.5 | 0.85 | 1465 | 31 | 1479 | 22 | 1498 | 28  | 98  |
| A319 | 7652  | 25  | 8  | 1.00 | 3.6  | 0.25700 | 2.4 | 3.343  | 4.7 | 0.09434 | 4.0 | 0.51 | 1474 | 31 | 1491 | 37 | 1515 | 76  | 97  |
| A269 | 17527 | 62  | 17 | 0.50 | 1.8  | 0.25740 | 2.3 | 3.332  | 3.1 | 0.09387 | 2.1 | 0.74 | 1477 | 30 | 1489 | 25 | 1506 | 40  | 98  |
| A295 | 11110 | 39  | 14 | 1.43 | b.d. | 0.25790 | 2.4 | 3.285  | 2.9 | 0.09237 | 1.5 | 0.84 | 1479 | 32 | 1477 | 23 | 1475 | 29  | 100 |
| A339 | 94535 | 188 | 51 | 0.25 | 2.8  | 0.25810 | 2.5 | 3.544  | 3.4 | 0.09958 | 2.2 | 0.74 | 1480 | 33 | 1537 | 27 | 1616 | 42  | 92  |
| A261 | 19231 | 69  | 24 | 1.29 | 4.6  | 0.26020 | 2.4 | 3.357  | 5.2 | 0.09354 | 4.6 | 0.46 | 1491 | 32 | 1494 | 42 | 1499 | 88  | 99  |
| A291 | 1595  | 5   | 2  | 1.00 | 0.3  | 0.26030 | 2.5 | 3.396  | 4.8 | 0.09463 | 4.1 | 0.53 | 1491 | 34 | 1504 | 39 | 1521 | 77  | 98  |
| A243 | 15193 | 39  | 11 | 0.33 | 2.0  | 0.26910 | 2.4 | 3.851  | 3.5 | 0.1038  | 2.5 | 0.70 | 1536 | 33 | 1603 | 29 | 1693 | 46  | 91  |
| A216 | 3450  | 11  | 4  | 0.84 | b.d. | 0.29160 | 2.6 | 4.03   | 3.5 | 0.1002  | 2.3 | 0.75 | 1650 | 38 | 1640 | 29 | 1629 | 43  | 101 |
| A237 | 17116 | 44  | 15 | 0.65 | 1.8  | 0.29190 | 2.6 | 4.211  | 3.3 | 0.1046  | 2.0 | 0.80 | 1651 | 39 | 1676 | 28 | 1708 | 37  | 97  |
| A296 | 37165 | 68  | 28 | 0.85 | 2.6  | 0.32760 | 2.3 | 4.81   | 3.3 | 0.1065  | 2.3 | 0.71 | 1827 | 37 | 1787 | 28 | 1740 | 43  | 105 |
| A228 | 53940 | 136 | 55 | 0.84 | 3.9  | 0.33590 | 2.4 | 4.976  | 4.1 | 0.1074  | 3.4 | 0.58 | 1867 | 39 | 1815 | 36 | 1756 | 62  | 106 |
| A308 | 30150 | 63  | 25 | 0.69 | 2.5  | 0.33700 | 2.3 | 5.364  | 3.2 | 0.1154  | 2.2 | 0.73 | 1872 | 38 | 1879 | 28 | 1887 | 40  | 99  |

|      |        |     |     |      |      |         |     |        |     |         |     |      |      |    |      |    |      |     |     |
|------|--------|-----|-----|------|------|---------|-----|--------|-----|---------|-----|------|------|----|------|----|------|-----|-----|
| A314 | 30016  | 56  | 21  | 0.41 | 1.3  | 0.34170 | 2.3 | 5.366  | 2.7 | 0.1139  | 1.4 | 0.86 | 1895 | 38 | 1879 | 23 | 1862 | 25  | 102 |
| A215 | 104952 | 180 | 68  | 0.37 | 1.2  | 0.34910 | 2.8 | 5.674  | 3.0 | 0.1179  | 1.3 | 0.91 | 1930 | 46 | 1927 | 27 | 1924 | 23  | 100 |
| A233 | 13288  | 22  | 10  | 0.45 | 1.7  | 0.38360 | 2.4 | 6.97   | 3.1 | 0.1318  | 1.9 | 0.79 | 2093 | 44 | 2108 | 28 | 2122 | 33  | 99  |
| A312 | 53836  | 47  | 26  | 0.81 | 7.9  | 0.38610 | 2.6 | 6.991  | 4.7 | 0.1313  | 3.9 | 0.55 | 2105 | 46 | 2110 | 42 | 2116 | 68  | 99  |
| A347 | 22588  | 18  | 10  | 0.86 | 4.9  | 0.44870 | 2.6 | 9.44   | 6.6 | 0.1526  | 6.1 | 0.40 | 2389 | 53 | 2382 | 63 | 2375 | 103 | 101 |
| A289 | 199808 | 205 | 104 | 0.32 | 0.7  | 0.45600 | 2.3 | 10.84  | 2.5 | 0.1724  | 0.8 | 0.94 | 2422 | 47 | 2510 | 23 | 2581 | 14  | 94  |
| A225 | 201372 | 196 | 95  | 0.11 | 0.4  | 0.45640 | 2.3 | 11.31  | 2.5 | 0.1798  | 0.9 | 0.93 | 2424 | 47 | 2549 | 23 | 2651 | 15  | 91  |
| A258 | 334451 | 289 | 149 | 0.21 | 0.6  | 0.47130 | 2.3 | 11.9   | 2.4 | 0.1831  | 0.7 | 0.96 | 2489 | 49 | 2596 | 23 | 2681 | 11  | 93  |
| A263 | 192909 | 182 | 99  | 0.37 | 1.2  | 0.48030 | 2.3 | 11.29  | 2.6 | 0.1705  | 1.0 | 0.92 | 2528 | 49 | 2547 | 24 | 2562 | 17  | 99  |
| A230 | 179375 | 173 | 96  | 0.50 | 1.5  | 0.48100 | 2.3 | 11.18  | 2.5 | 0.1685  | 1.1 | 0.91 | 2532 | 48 | 2538 | 24 | 2543 | 18  | 100 |
| A310 | 72697  | 69  | 40  | 0.57 | 1.9  | 0.48640 | 2.4 | 12     | 2.7 | 0.179   | 1.3 | 0.87 | 2555 | 50 | 2605 | 26 | 2643 | 22  | 97  |
| A276 | 130801 | 81  | 59  | 0.54 | 1.5  | 0.59960 | 2.3 | 19.14  | 2.5 | 0.2315  | 0.8 | 0.94 | 3028 | 56 | 3049 | 24 | 3062 | 13  | 99  |
| A273 | 193268 | 84  | 89  | 0.62 | 10.2 | 0.71090 | 2.8 | 28.45  | 6.4 | 0.2902  | 5.8 | 0.43 | 3462 | 75 | 3435 | 65 | 3419 | 90  | 101 |
| disc |        |     |     |      |      |         |     |        |     |         |     |      |      |    |      |    |      |     |     |
| A245 | 2571   | 49  | 3   | 0.26 | 1.1  | 0.06609 | 2.7 | 0.4916 | 4.5 | 0.05394 | 3.6 | 0.59 | 413  | 11 | 406  | 15 | 369  | 82  | 112 |
| A249 | 6509   | 111 | 9   | 0.43 | 0.7  | 0.06798 | 3.4 | 0.5303 | 4.0 | 0.05657 | 2.2 | 0.84 | 424  | 14 | 432  | 14 | 475  | 49  | 89  |
| A343 | 6674   | 92  | 7   | 0.32 | 0.9  | 0.06797 | 2.4 | 0.5302 | 3.4 | 0.05658 | 2.5 | 0.69 | 424  | 10 | 432  | 12 | 475  | 55  | 89  |
| A334 | 87113  | 232 | 56  | 0.49 | 3.5  | 0.20690 | 2.5 | 2.487  | 3.7 | 0.08718 | 2.7 | 0.67 | 1212 | 27 | 1268 | 27 | 1365 | 52  | 89  |
| A346 | 3128   | 35  | 3   | 0.79 | 0.6  | 0.06712 | 2.4 | 0.523  | 3.6 | 0.05651 | 2.7 | 0.66 | 419  | 10 | 427  | 13 | 473  | 61  | 89  |
| A223 | 3333   | 52  | 5   | 0.57 | 1.9  | 0.08674 | 2.4 | 0.7181 | 4.1 | 0.06004 | 3.3 | 0.58 | 536  | 12 | 550  | 18 | 605  | 72  | 89  |
| A309 | 17585  | 107 | 15  | 0.25 | 1.8  | 0.13250 | 2.4 | 1.264  | 3.3 | 0.06921 | 2.4 | 0.71 | 802  | 18 | 830  | 19 | 905  | 49  | 89  |
| A320 | 23407  | 205 | 28  | 0.66 | 1.9  | 0.11560 | 2.8 | 1.047  | 3.8 | 0.06571 | 2.6 | 0.72 | 705  | 18 | 727  | 20 | 797  | 55  | 88  |
| A341 | 4484   | 60  | 5   | 0.49 | 1.2  | 0.07007 | 2.5 | 0.5523 | 3.2 | 0.05717 | 2.0 | 0.79 | 437  | 11 | 447  | 12 | 498  | 43  | 88  |
| A274 | 10545  | 308 | 14  | 0.01 | 0.3  | 0.05057 | 2.3 | 0.3753 | 2.9 | 0.05382 | 1.8 | 0.79 | 318  | 7  | 324  | 8  | 364  | 40  | 87  |
| A307 | 11617  | 291 | 20  | 0.25 | 1.0  | 0.07042 | 2.5 | 0.556  | 3.7 | 0.05726 | 2.7 | 0.69 | 439  | 11 | 449  | 13 | 502  | 58  | 87  |
| A272 | 10679  | 121 | 10  | 0.10 | 1.7  | 0.08114 | 2.6 | 0.6629 | 3.6 | 0.05925 | 2.5 | 0.71 | 503  | 12 | 516  | 15 | 576  | 55  | 87  |
| A248 | 6592   | 127 | 9   | 0.19 | 1.4  | 0.06924 | 2.5 | 0.5463 | 4.7 | 0.05723 | 4.0 | 0.53 | 432  | 10 | 443  | 17 | 500  | 88  | 86  |
| A266 | 7818   | 65  | 8   | 0.63 | 3.6  | 0.09642 | 2.5 | 0.8349 | 4.3 | 0.0628  | 3.4 | 0.59 | 593  | 14 | 616  | 20 | 702  | 73  | 85  |
| A250 | 13256  | 155 | 12  | 0.06 | 2.3  | 0.08219 | 2.4 | 0.6805 | 3.8 | 0.06006 | 3.0 | 0.63 | 509  | 12 | 527  | 16 | 606  | 64  | 84  |
| A257 | 31585  | 118 | 19  | 0.24 | 4.6  | 0.13630 | 2.5 | 1.349  | 4.4 | 0.07179 | 3.6 | 0.56 | 824  | 19 | 867  | 26 | 980  | 74  | 84  |
| A255 | 45523  | 214 | 38  | 0.09 | 5.1  | 0.17960 | 2.6 | 2.066  | 4.3 | 0.08344 | 3.4 | 0.62 | 1065 | 26 | 1138 | 30 | 1280 | 66  | 83  |
| A340 | 40247  | 269 | 32  | 0.35 | 3.5  | 0.11200 | 4.2 | 1.028  | 5.3 | 0.06658 | 3.2 | 0.80 | 684  | 28 | 718  | 28 | 825  | 67  | 83  |
| A244 | 11599  | 87  | 10  | 0.12 | 3.6  | 0.11480 | 2.5 | 1.066  | 4.5 | 0.06734 | 3.8 | 0.55 | 701  | 17 | 737  | 24 | 848  | 79  | 83  |
| A292 | 3626   | 78  | 5   | 0.08 | 0.9  | 0.06202 | 2.3 | 0.4833 | 3.5 | 0.05651 | 2.6 | 0.66 | 388  | 9  | 400  | 12 | 473  | 58  | 82  |
| A227 | 6739   | 108 | 7   | 0.16 | 2.2  | 0.06426 | 3.0 | 0.5053 | 4.5 | 0.05703 | 3.5 | 0.65 | 402  | 12 | 415  | 16 | 493  | 76  | 81  |
| A305 | 7710   | 21  | 4   | 0.36 | 7.2  | 0.14260 | 2.7 | 1.476  | 6.4 | 0.07507 | 5.8 | 0.42 | 859  | 22 | 921  | 39 | 1070 | 116 | 80  |

|      |        |      |     |      |      |         |     |        |      |         |      |      |      |    |      |     |      |     |    |
|------|--------|------|-----|------|------|---------|-----|--------|------|---------|------|------|------|----|------|-----|------|-----|----|
| A298 | 30212  | 344  | 45  | 1.12 | 1.7  | 0.09685 | 2.6 | 0.8583 | 3.7  | 0.06427 | 2.5  | 0.73 | 596  | 15 | 629  | 17  | 751  | 53  | 79 |
| A280 | 7548   | 77   | 5   | 0.39 | 5.6  | 0.05585 | 2.8 | 0.4291 | 6.3  | 0.05573 | 5.6  | 0.45 | 350  | 10 | 363  | 19  | 441  | 124 | 79 |
| A254 | 41567  | 454  | 44  | 0.12 | 4.7  | 0.10010 | 2.8 | 0.9054 | 4.8  | 0.06559 | 3.9  | 0.58 | 615  | 16 | 655  | 24  | 793  | 82  | 78 |
| A253 | 33703  | 107  | 13  | 0.12 | 21.2 | 0.08080 | 3.4 | 0.687  | 10.3 | 0.06167 | 9.7  | 0.33 | 501  | 16 | 531  | 43  | 663  | 208 | 76 |
| A344 | 11298  | 199  | 10  | 0.01 | 0.5  | 0.05599 | 2.9 | 0.4353 | 3.7  | 0.05639 | 2.2  | 0.80 | 351  | 10 | 367  | 11  | 468  | 49  | 75 |
| A306 | 146580 | 4502 | 571 | 5.68 | 0.1  | 0.04831 | 2.3 | 0.3654 | 2.4  | 0.05486 | 0.8  | 0.95 | 304  | 7  | 316  | 7   | 407  | 17  | 75 |
| A212 | 1748   | 24   | 2   | 0.54 | 3.2  | 0.09097 | 2.4 | 0.8173 | 6.7  | 0.06516 | 6.2  | 0.36 | 561  | 13 | 607  | 31  | 780  | 131 | 72 |
| A217 | 8648   | 218  | 12  | 0.09 | 0.0  | 0.05731 | 2.3 | 0.4522 | 2.9  | 0.05722 | 1.7  | 0.81 | 359  | 8  | 379  | 9   | 500  | 37  | 72 |
| A318 | 34791  | 85   | 19  | 0.08 | 1.9  | 0.22240 | 2.5 | 3.481  | 3.4  | 0.1135  | 2.3  | 0.75 | 1295 | 30 | 1523 | 27  | 1856 | 41  | 70 |
| A252 | 38597  | 119  | 15  | 0.13 | 12.0 | 0.09124 | 2.7 | 0.844  | 6.1  | 0.06709 | 5.4  | 0.45 | 563  | 15 | 621  | 29  | 840  | 113 | 67 |
| A232 | 54390  | 151  | 30  | 0.29 | 3.4  | 0.17110 | 2.9 | 2.244  | 4.1  | 0.0951  | 2.9  | 0.71 | 1018 | 27 | 1195 | 29  | 1530 | 55  | 67 |
| A338 | 7104   | 21   | 3   | 0.42 | 12.3 | 0.07593 | 3.0 | 0.6718 | 6.9  | 0.06417 | 6.2  | 0.44 | 472  | 14 | 522  | 29  | 747  | 131 | 63 |
| A315 | 24555  | 226  | 16  | 0.04 | 8.2  | 0.05994 | 3.6 | 0.5027 | 6.4  | 0.06083 | 5.2  | 0.56 | 375  | 13 | 414  | 22  | 633  | 113 | 59 |
| A327 | 13177  | 350  | 11  | 0.17 | 4.6  | 0.03081 | 3.5 | 0.2269 | 5.3  | 0.0534  | 4.0  | 0.66 | 196  | 7  | 208  | 10  | 346  | 90  | 57 |
| A324 | 26380  | 157  | 22  | 0.17 | 0.9  | 0.13380 | 4.4 | 2.015  | 4.8  | 0.1092  | 2.0  | 0.91 | 810  | 33 | 1121 | 33  | 1787 | 37  | 45 |
| A323 | 25073  | 91   | 23  | 0.15 | 13.7 | 0.19440 | 5.5 | 5.586  | 19.3 | 0.2084  | 18.5 | 0.29 | 1145 | 58 | 1914 | 182 | 2893 | 300 | 40 |
| A336 | 8790   | 242  | 8   | 1.15 | 8.2  | 0.02151 | 3.6 | 0.1603 | 6.3  | 0.05404 | 5.2  | 0.57 | 137  | 5  | 151  | 9   | 373  | 117 | 37 |
| A218 | 26272  | 278  | 21  | 0.09 | 0.0  | 0.07355 | 2.7 | 0.8448 | 3.1  | 0.0833  | 1.5  | 0.87 | 458  | 12 | 622  | 15  | 1276 | 30  | 36 |
