# Supplementary material for: Provenance of lower Palaeozoic metasediments of the East Odenwald (Mid-German-Crystalline Zone, Variscides)—a correlation with the East European Platform (Poland)
Source: Springer Nature journal article supplement (doi:10.1007/s00531-021-02103-y), 2021-09-21
Supplement: MOESM7 [file 531_2021_2103_MOESM7_ESM.pdf]

| grain    | $^{207}\text{Pb}^a$<br>(cps) | $\text{U}^b$<br>(ppm) | $\text{Pb}^b$<br>(ppm) | $\frac{\text{Th}^b}{\text{U}}$ | $^{206}\text{Pbc}^c$<br>(%) | $\frac{^{206}\text{Pbd}^d}{^{238}\text{U}}$ | $\pm 2\sigma$<br>(%) | $\frac{^{207}\text{Pbd}^d}{^{235}\text{U}}$ | $\pm 2\sigma$<br>(%) | $\frac{^{207}\text{Pbd}^d}{^{206}\text{Pb}}$ | $\pm 2\sigma$<br>(%) | rho <sup>e</sup> | $\frac{^{206}\text{Pb}}{^{238}\text{U}}$ | $\pm 2\sigma$<br>(Ma) | $\frac{^{207}\text{Pb}}{^{235}\text{U}}$ | $\pm 2\sigma$<br>(Ma) | $\frac{^{207}\text{Pb}}{^{206}\text{Pb}}$ | $\pm 2\sigma$<br>(Ma) | conc. <sup>f</sup><br>(%) |
|----------|------------------------------|-----------------------|------------------------|--------------------------------|-----------------------------|---------------------------------------------|----------------------|---------------------------------------------|----------------------|----------------------------------------------|----------------------|------------------|------------------------------------------|-----------------------|------------------------------------------|-----------------------|-------------------------------------------|-----------------------|---------------------------|
| Lysogory |                              |                       |                        |                                |                             |                                             |                      |                                             |                      |                                              |                      |                  |                                          |                       |                                          |                       |                                           |                       |                           |
| a105     | 4247                         | 63                    | 5.7                    | 0.57                           | b.d.                        | 0.08618                                     | 2.1                  | 0.6951                                      | 3.0                  | 0.05849                                      | 2.1                  | 0.70             | 533                                      | 11                    | 536                                      | 12                    | 548                                       | 46                    | 97                        |
| a50      | 11559                        | 167                   | 21                     | 2.19                           | b.d.                        | 0.08952                                     | 1.7                  | 0.7249                                      | 2.4                  | 0.05873                                      | 1.7                  | 0.70             | 553                                      | 9                     | 554                                      | 10                    | 557                                       | 38                    | 99                        |
| a72      | 6439                         | 89                    | 8.6                    | 0.70                           | b.d.                        | 0.08952                                     | 1.6                  | 0.7336                                      | 2.1                  | 0.05943                                      | 1.4                  | 0.76             | 553                                      | 9                     | 559                                      | 9                     | 583                                       | 30                    | 95                        |
| a76      | 12713                        | 182                   | 19                     | 0.93                           | b.d.                        | 0.09002                                     | 1.9                  | 0.7295                                      | 2.3                  | 0.05877                                      | 1.3                  | 0.82             | 556                                      | 10                    | 556                                      | 10                    | 559                                       | 29                    | 99                        |
| a108     | 10782                        | 56                    | 6.9                    | 0.79                           | 9.00                        | 0.09063                                     | 2.6                  | 0.7406                                      | 6.9                  | 0.05926                                      | 6.4                  | 0.38             | 559                                      | 14                    | 563                                      | 30                    | 577                                       | 138                   | 97                        |
| a41      | 6699                         | 99                    | 10                     | 0.82                           | b.d.                        | 0.09092                                     | 1.5                  | 0.7417                                      | 2.1                  | 0.05916                                      | 1.4                  | 0.73             | 561                                      | 8                     | 563                                      | 9                     | 573                                       | 31                    | 98                        |
| a11      | 4004                         | 57                    | 6.7                    | 1.52                           | b.d.                        | 0.09151                                     | 1.6                  | 0.7446                                      | 2.6                  | 0.05902                                      | 2.1                  | 0.60             | 564                                      | 9                     | 565                                      | 11                    | 568                                       | 45                    | 99                        |
| a63      | 15049                        | 209                   | 20                     | 0.51                           | b.d.                        | 0.09155                                     | 1.6                  | 0.7461                                      | 2.0                  | 0.05911                                      | 1.1                  | 0.83             | 565                                      | 9                     | 566                                      | 9                     | 571                                       | 24                    | 99                        |
| a101     | 5492                         | 72                    | 7.9                    | 1.13                           | b.d.                        | 0.09242                                     | 2.0                  | 0.7624                                      | 2.5                  | 0.05983                                      | 1.6                  | 0.78             | 570                                      | 11                    | 575                                      | 11                    | 597                                       | 34                    | 95                        |
| a100     | 6173                         | 81                    | 9.3                    | 1.27                           | b.d.                        | 0.09244                                     | 1.8                  | 0.7637                                      | 3.0                  | 0.05992                                      | 2.4                  | 0.61             | 570                                      | 10                    | 576                                      | 13                    | 601                                       | 51                    | 95                        |
| a95      | 4438                         | 61                    | 6.1                    | 0.71                           | b.d.                        | 0.09248                                     | 1.8                  | 0.755                                       | 2.5                  | 0.05921                                      | 1.8                  | 0.72             | 570                                      | 10                    | 571                                      | 11                    | 575                                       | 38                    | 99                        |
| a64      | 19831                        | 279                   | 27                     | 0.60                           | b.d.                        | 0.09273                                     | 1.6                  | 0.7568                                      | 1.9                  | 0.0592                                       | 1.0                  | 0.85             | 572                                      | 9                     | 572                                      | 8                     | 574                                       | 22                    | 100                       |
| a66      | 3719                         | 49                    | 5.1                    | 0.84                           | b.d.                        | 0.09291                                     | 1.4                  | 0.7683                                      | 2.3                  | 0.05997                                      | 1.9                  | 0.59             | 573                                      | 8                     | 579                                      | 10                    | 603                                       | 41                    | 95                        |
| a61      | 7427                         | 109                   | 13                     | 1.71                           | b.d.                        | 0.09299                                     | 1.4                  | 0.7703                                      | 2.3                  | 0.06008                                      | 1.8                  | 0.61             | 573                                      | 8                     | 580                                      | 10                    | 606                                       | 39                    | 95                        |
| a96      | 12251                        | 167                   | 17                     | 0.78                           | b.d.                        | 0.09331                                     | 1.4                  | 0.7691                                      | 1.8                  | 0.05978                                      | 1.2                  | 0.75             | 575                                      | 8                     | 579                                      | 8                     | 595                                       | 26                    | 97                        |
| a7       | 6395                         | 91                    | 8.8                    | 0.49                           | b.d.                        | 0.09366                                     | 1.5                  | 0.7683                                      | 2.3                  | 0.05949                                      | 1.7                  | 0.64             | 577                                      | 8                     | 579                                      | 10                    | 585                                       | 38                    | 99                        |
| a114     | 8382                         | 113                   | 13                     | 1.59                           | b.d.                        | 0.09394                                     | 1.3                  | 0.7705                                      | 2.0                  | 0.05948                                      | 1.5                  | 0.64             | 579                                      | 7                     | 580                                      | 9                     | 585                                       | 33                    | 99                        |
| a106     | 4028                         | 50                    | 7.3                    | 2.53                           | b.d.                        | 0.09403                                     | 2.7                  | 0.7730                                      | 3.5                  | 0.05962                                      | 2.2                  | 0.77             | 579                                      | 15                    | 581                                      | 16                    | 590                                       | 49                    | 98                        |
| a10      | 5578                         | 64                    | 8.5                    | 1.90                           | 1.53                        | 0.09462                                     | 1.4                  | 0.7862                                      | 3.9                  | 0.06026                                      | 3.6                  | 0.36             | 583                                      | 8                     | 589                                      | 18                    | 613                                       | 79                    | 95                        |
| a122     | 22824                        | 303                   | 27                     | 0.03                           | 0.02                        | 0.09497                                     | 1.3                  | 0.7875                                      | 1.5                  | 0.06014                                      | 0.8                  | 0.85             | 585                                      | 7                     | 590                                      | 7                     | 608                                       | 17                    | 96                        |
| a99      | 6615                         | 82                    | 9.1                    | 1.01                           | b.d.                        | 0.0952                                      | 1.5                  | 0.7856                                      | 2.5                  | 0.05985                                      | 2.0                  | 0.61             | 586                                      | 9                     | 589                                      | 11                    | 598                                       | 43                    | 98                        |
| a65      | 4817                         | 68                    | 7.6                    | 1.10                           | b.d.                        | 0.09522                                     | 1.5                  | 0.7788                                      | 2.4                  | 0.05932                                      | 1.8                  | 0.65             | 586                                      | 9                     | 585                                      | 11                    | 579                                       | 39                    | 101                       |
| a97      | 33684                        | 461                   | 56                     | 1.50                           | b.d.                        | 0.09555                                     | 1.8                  | 0.7796                                      | 2.0                  | 0.05918                                      | 1.0                  | 0.88             | 588                                      | 10                    | 585                                      | 9                     | 574                                       | 21                    | 103                       |
| a75      | 10411                        | 117                   | 12                     | 0.39                           | 1.20                        | 0.09572                                     | 1.6                  | 0.7985                                      | 2.6                  | 0.0605                                       | 2.1                  | 0.62             | 589                                      | 9                     | 596                                      | 12                    | 621                                       | 45                    | 95                        |
| a47      | 8281                         | 72                    | 7.9                    | 0.63                           | 1.77                        | 0.09585                                     | 2.1                  | 0.7964                                      | 3.9                  | 0.06026                                      | 3.2                  | 0.55             | 590                                      | 12                    | 595                                      | 18                    | 613                                       | 70                    | 96                        |
| a36      | 21272                        | 298                   | 33                     | 1.05                           | b.d.                        | 0.09611                                     | 1.8                  | 0.7854                                      | 2.0                  | 0.05927                                      | 0.9                  | 0.90             | 592                                      | 10                    | 589                                      | 9                     | 577                                       | 19                    | 103                       |
| a116     | 4590                         | 63                    | 8.9                    | 2.54                           | b.d.                        | 0.09612                                     | 1.9                  | 0.7955                                      | 2.7                  | 0.06003                                      | 1.9                  | 0.70             | 592                                      | 11                    | 594                                      | 12                    | 604                                       | 42                    | 98                        |
| a84      | 3718                         | 49                    | 5.7                    | 1.24                           | b.d.                        | 0.09665                                     | 1.4                  | 0.7983                                      | 2.5                  | 0.0599                                       | 2.1                  | 0.55             | 595                                      | 8                     | 596                                      | 11                    | 600                                       | 46                    | 99                        |
| a107     | 2624                         | 33                    | 3.6                    | 0.76                           | b.d.                        | 0.09762                                     | 2.6                  | 0.8147                                      | 3.4                  | 0.06052                                      | 2.2                  | 0.76             | 600                                      | 15                    | 605                                      | 16                    | 622                                       | 48                    | 96                        |
| a89      | 1610                         | 20                    | 2.6                    | 1.75                           | b.d.                        | 0.09842                                     | 1.7                  | 0.8149                                      | 3.7                  | 0.06005                                      | 3.3                  | 0.47             | 605                                      | 10                    | 605                                      | 17                    | 605                                       | 70                    | 100                       |
| a31      | 8091                         | 107                   | 13                     | 1.33                           | b.d.                        | 0.09878                                     | 1.2                  | 0.8132                                      | 1.9                  | 0.05971                                      | 1.4                  | 0.65             | 607                                      | 7                     | 604                                      | 9                     | 593                                       | 31                    | 102                       |
| a83      | 4571                         | 59                    | 6.3                    | 0.66                           | b.d.                        | 0.09899                                     | 1.6                  | 0.8222                                      | 2.4                  | 0.06024                                      | 1.8                  | 0.67             | 608                                      | 9                     | 609                                      | 11                    | 612                                       | 38                    | 99                        |
| a43      | 14453                        | 218                   | 25                     | 1.18                           | b.d.                        | 0.09918                                     | 1.9                  | 0.8171                                      | 2.3                  | 0.05975                                      | 1.2                  | 0.85             | 610                                      | 11                    | 606                                      | 10                    | 594                                       | 26                    | 103                       |

|      |        |     |      |      |      |         |     |        |      |         |      |      |      |    |      |    |      |     |     |
|------|--------|-----|------|------|------|---------|-----|--------|------|---------|------|------|------|----|------|----|------|-----|-----|
| a42  | 11528  | 154 | 19   | 1.54 | 0.29 | 0.09932 | 1.5 | 0.8175 | 2.1  | 0.0597  | 1.4  | 0.72 | 610  | 9  | 607  | 10 | 593  | 31  | 103 |
| a121 | 22482  | 292 | 27   | 0.03 | b.d. | 0.09935 | 1.7 | 0.8317 | 2.0  | 0.06072 | 1.1  | 0.84 | 611  | 10 | 615  | 9  | 629  | 23  | 97  |
| a119 | 5055   | 64  | 7.7  | 1.16 | b.d. | 0.1002  | 1.7 | 0.8382 | 2.8  | 0.06070 | 2.1  | 0.63 | 615  | 10 | 618  | 13 | 628  | 46  | 98  |
| a77  | 23325  | 290 | 32   | 0.77 | b.d. | 0.1011  | 1.5 | 0.8469 | 1.8  | 0.06073 | 1.0  | 0.84 | 621  | 9  | 623  | 9  | 630  | 21  | 99  |
| a92  | 5022   | 65  | 8.1  | 1.41 | b.d. | 0.1012  | 1.5 | 0.8485 | 2.5  | 0.06082 | 2.0  | 0.59 | 621  | 9  | 624  | 12 | 633  | 44  | 98  |
| a82  | 3360   | 42  | 4.6  | 0.56 | b.d. | 0.1046  | 1.5 | 0.8806 | 2.8  | 0.06107 | 2.3  | 0.54 | 641  | 9  | 641  | 13 | 642  | 50  | 100 |
| a113 | 2849   | 34  | 4.2  | 1.15 | b.d. | 0.1058  | 1.4 | 0.9043 | 2.8  | 0.06199 | 2.4  | 0.51 | 648  | 9  | 654  | 13 | 674  | 51  | 96  |
| a115 | 2849   | 35  | 4.2  | 1.14 | b.d. | 0.1058  | 1.7 | 0.9043 | 2.9  | 0.06199 | 2.4  | 0.58 | 648  | 10 | 654  | 14 | 674  | 51  | 96  |
| a110 | 12876  | 142 | 17   | 0.79 | b.d. | 0.1093  | 1.7 | 0.9369 | 2.0  | 0.06215 | 1.0  | 0.86 | 669  | 11 | 671  | 10 | 679  | 22  | 98  |
| a102 | 24007  | 263 | 39   | 1.91 | b.d. | 0.1095  | 1.8 | 0.9376 | 2.2  | 0.06212 | 1.3  | 0.81 | 670  | 11 | 672  | 11 | 678  | 28  | 99  |
| a118 | 9685   | 107 | 13   | 0.85 | b.d. | 0.1103  | 1.5 | 0.9506 | 1.8  | 0.06251 | 1.1  | 0.81 | 674  | 9  | 678  | 9  | 692  | 22  | 98  |
| a94  | 571    | 7   | 1    | 1.61 | b.d. | 0.1109  | 2.1 | 0.9571 | 7.5  | 0.06257 | 7.2  | 0.28 | 678  | 14 | 682  | 38 | 694  | 154 | 98  |
| a120 | 6606   | 70  | 9.2  | 1.07 | b.d. | 0.1134  | 1.5 | 0.9844 | 2.0  | 0.06295 | 1.3  | 0.76 | 693  | 10 | 696  | 10 | 707  | 28  | 98  |
| a48  | 22432  | 254 | 29   | 0.42 | b.d. | 0.1136  | 2.5 | 0.9842 | 2.7  | 0.06283 | 1.1  | 0.91 | 694  | 16 | 696  | 14 | 703  | 24  | 99  |
| a80  | 6976   | 79  | 10   | 1.09 | b.d. | 0.1138  | 1.5 | 0.9914 | 2.3  | 0.06320 | 1.7  | 0.66 | 695  | 10 | 699  | 11 | 715  | 36  | 97  |
| a71  | 38741  | 382 | 52   | 0.75 | b.d. | 0.1251  | 1.4 | 1.139  | 1.7  | 0.06602 | 0.9  | 0.84 | 760  | 10 | 772  | 9  | 807  | 19  | 94  |
| a13  | 4582   | 31  | 6.3  | 1.36 | 0.45 | 0.1596  | 1.8 | 1.549  | 2.8  | 0.0704  | 2.1  | 0.65 | 954  | 16 | 950  | 17 | 940  | 43  | 102 |
| a40  | 451    | 3   | 0.48 | 0.53 | 1.62 | 0.1702  | 3.0 | 1.745  | 7.7  | 0.07436 | 7.1  | 0.39 | 1013 | 28 | 1025 | 51 | 1051 | 143 | 96  |
| a52  | 17504  | 77  | 19   | 0.90 | b.d. | 0.221   | 1.3 | 2.586  | 2.1  | 0.08486 | 1.6  | 0.63 | 1287 | 16 | 1297 | 16 | 1312 | 32  | 98  |
| a53  | 95700  | 346 | 93   | 0.56 | 0.77 | 0.2526  | 2.3 | 3.1960 | 2.5  | 0.09175 | 1.0  | 0.91 | 1452 | 30 | 1456 | 20 | 1462 | 19  | 99  |
| a98  | 32762  | 106 | 35   | 1.59 | b.d. | 0.2602  | 1.4 | 3.3750 | 1.6  | 0.09407 | 0.7  | 0.89 | 1491 | 19 | 1499 | 13 | 1509 | 14  | 99  |
| a60  | 11860  | 35  | 14   | 2.72 | b.d. | 0.2621  | 1.8 | 3.404  | 2.2  | 0.09419 | 1.3  | 0.81 | 1501 | 24 | 1505 | 18 | 1512 | 25  | 99  |
| a14  | 20196  | 59  | 19   | 1.29 | 0.18 | 0.26210 | 1.9 | 3.443  | 2.2  | 0.09526 | 1.2  | 0.85 | 1501 | 26 | 1514 | 18 | 1533 | 22  | 98  |
| a91  | 52775  | 162 | 49   | 0.87 | b.d. | 0.2643  | 1.6 | 3.448  | 1.8  | 0.09459 | 0.8  | 0.91 | 1512 | 22 | 1515 | 14 | 1520 | 14  | 99  |
| a59  | 82778  | 259 | 73   | 0.51 | b.d. | 0.265   | 1.6 | 3.392  | 1.8  | 0.09285 | 0.7  | 0.92 | 1515 | 22 | 1503 | 14 | 1485 | 13  | 102 |
| a44  | 23696  | 76  | 26   | 1.40 | b.d. | 0.2656  | 1.6 | 3.439  | 1.9  | 0.09392 | 1.0  | 0.86 | 1518 | 22 | 1513 | 15 | 1506 | 18  | 101 |
| a112 | 51897  | 153 | 43   | 0.51 | b.d. | 0.2668  | 1.4 | 3.528  | 1.6  | 0.09589 | 0.8  | 0.86 | 1525 | 18 | 1533 | 13 | 1546 | 15  | 99  |
| a111 | 49496  | 143 | 42   | 0.53 | b.d. | 0.2743  | 1.4 | 3.589  | 1.5  | 0.0949  | 0.7  | 0.88 | 1562 | 19 | 1547 | 12 | 1526 | 14  | 102 |
| a33  | 14022  | 42  | 16   | 2.05 | b.d. | 0.2765  | 1.5 | 3.6630 | 1.9  | 0.09609 | 1.1  | 0.81 | 1573 | 21 | 1563 | 15 | 1549 | 20  | 102 |
| a51  | 41230  | 122 | 43   | 1.49 | b.d. | 0.279   | 1.2 | 3.737  | 1.6  | 0.09715 | 1.1  | 0.74 | 1586 | 17 | 1579 | 13 | 1570 | 20  | 101 |
| a69  | 45078  | 134 | 43   | 0.86 | b.d. | 0.2871  | 1.4 | 3.7030 | 10.1 | 0.09353 | 10.0 | 0.14 | 1627 | 21 | 1572 | 84 | 1499 | 189 | 109 |
| a55  | 28689  | 69  | 28   | 1.49 | b.d. | 0.31450 | 1.7 | 4.609  | 2.2  | 0.10630 | 1.4  | 0.76 | 1763 | 26 | 1751 | 18 | 1737 | 26  | 102 |
| a15  | 83058  | 183 | 67   | 0.83 | b.d. | 0.3216  | 1.5 | 4.8370 | 1.7  | 0.1091  | 0.8  | 0.88 | 1798 | 24 | 1791 | 15 | 1784 | 15  | 101 |
| a86  | 13280  | 20  | 7.2  | 0.28 | b.d. | 0.352   | 1.4 | 6.333  | 2.0  | 0.1305  | 1.4  | 0.71 | 1944 | 24 | 2023 | 18 | 2105 | 25  | 92  |
| a17  | 138688 | 261 | 110  | 0.76 | 0.21 | 0.3549  | 1.9 | 5.752  | 2.0  | 0.11760 | 0.8  | 0.91 | 1958 | 31 | 1939 | 18 | 1919 | 15  | 102 |
| a26  | 62348  | 118 | 46   | 0.54 | b.d. | 0.36080 | 1.4 | 5.739  | 1.8  | 0.1154  | 1.1  | 0.79 | 1986 | 24 | 1937 | 15 | 1885 | 20  | 105 |

|      |         |     |     |      |      |         |     |         |     |        |     |      |      |    |      |    |      |    |     |
|------|---------|-----|-----|------|------|---------|-----|---------|-----|--------|-----|------|------|----|------|----|------|----|-----|
| a46  | 14097   | 25  | 15  | 3.04 | b.d. | 0.3648  | 2.0 | 6.208   | 2.4 | 0.1234 | 1.4 | 0.81 | 2005 | 34 | 2006 | 22 | 2006 | 26 | 100 |
| a79  | 58356   | 98  | 40  | 0.62 | b.d. | 0.3706  | 1.4 | 6.244   | 1.5 | 0.1222 | 0.7 | 0.90 | 2032 | 24 | 2011 | 13 | 1989 | 12 | 102 |
| a19  | 27203   | 44  | 18  | 0.48 | 0.58 | 0.3753  | 2.2 | 6.7     | 2.5 | 0.1295 | 1.1 | 0.90 | 2054 | 39 | 2073 | 22 | 2091 | 19 | 98  |
| a18  | 41605   | 63  | 28  | 0.88 | 0.31 | 0.3765  | 1.7 | 6.732   | 2.0 | 0.1297 | 1.0 | 0.86 | 2060 | 30 | 2077 | 17 | 2093 | 17 | 98  |
| a8   | 54687   | 93  | 39  | 0.55 | 0.01 | 0.3814  | 1.7 | 6.787   | 1.9 | 0.1291 | 0.9 | 0.88 | 2083 | 30 | 2084 | 17 | 2085 | 16 | 100 |
| a21  | 32203   | 53  | 26  | 1.29 | 0.04 | 0.3850  | 1.6 | 6.655   | 1.8 | 0.1254 | 0.9 | 0.87 | 2100 | 28 | 2067 | 16 | 2034 | 15 | 103 |
| a25  | 323686  | 494 | 210 | 0.61 | b.d. | 0.3894  | 1.9 | 7.152   | 3.0 | 0.1332 | 2.3 | 0.64 | 2120 | 34 | 2131 | 27 | 2141 | 40 | 99  |
| a58  | 38595   | 58  | 27  | 0.92 | b.d. | 0.3926  | 1.7 | 7.0800  | 1.8 | 0.1308 | 0.6 | 0.94 | 2135 | 31 | 2121 | 16 | 2108 | 10 | 101 |
| a32  | 33755   | 53  | 24  | 0.86 | b.d. | 0.3943  | 1.9 | 7.136   | 2.9 | 0.1313 | 2.2 | 0.65 | 2143 | 34 | 2129 | 26 | 2115 | 38 | 101 |
| a30  | 41390   | 60  | 26  | 0.47 | 0.24 | 0.3955  | 1.6 | 7.169   | 1.9 | 0.1315 | 1.1 | 0.82 | 2148 | 29 | 2133 | 17 | 2118 | 19 | 101 |
| a29  | 63562   | 101 | 50  | 1.20 | 0.00 | 0.39610 | 1.6 | 6.842   | 1.9 | 0.1253 | 0.9 | 0.88 | 2151 | 30 | 2091 | 17 | 2033 | 16 | 106 |
| a87  | 65682   | 95  | 43  | 0.81 | b.d. | 0.3982  | 1.5 | 7.488   | 1.6 | 0.1364 | 0.7 | 0.91 | 2161 | 28 | 2172 | 15 | 2182 | 12 | 99  |
| a22  | 32294   | 51  | 26  | 1.34 | b.d. | 0.3983  | 1.5 | 6.897   | 1.8 | 0.1256 | 0.9 | 0.86 | 2161 | 28 | 2098 | 16 | 2037 | 16 | 106 |
| a85  | 65371   | 93  | 40  | 0.38 | b.d. | 0.4026  | 1.5 | 7.665   | 1.7 | 0.1381 | 0.6 | 0.92 | 2181 | 29 | 2193 | 15 | 2203 | 11 | 99  |
| a27  | 81530   | 125 | 61  | 1.04 | b.d. | 0.40390 | 1.5 | 7.144   | 1.6 | 0.1283 | 0.7 | 0.90 | 2187 | 28 | 2130 | 15 | 2075 | 12 | 105 |
| a56  | 42201   | 55  | 25  | 0.35 | b.d. | 0.4236  | 1.4 | 8.361   | 1.6 | 0.1431 | 0.7 | 0.89 | 2277 | 27 | 2271 | 15 | 2266 | 13 | 100 |
| a93  | 245529  | 270 | 140 | 0.49 | 0.02 | 0.4655  | 1.9 | 10.02   | 2.1 | 0.1562 | 0.8 | 0.92 | 2464 | 39 | 2437 | 19 | 2414 | 14 | 102 |
| a54  | 162799  | 145 | 79  | 0.73 | b.d. | 0.46640 | 1.5 | 11.2    | 1.6 | 0.1741 | 0.5 | 0.94 | 2468 | 31 | 2540 | 15 | 2598 | 9  | 95  |
| a68  | 505220  | 428 | 220 | 0.40 | b.d. | 0.4748  | 1.5 | 12.12   | 1.6 | 0.1851 | 0.5 | 0.95 | 2505 | 32 | 2614 | 15 | 2699 | 8  | 93  |
| a62  | 147636  | 150 | 78  | 0.43 | b.d. | 0.4775  | 1.4 | 10.54   | 1.5 | 0.1602 | 0.6 | 0.92 | 2516 | 29 | 2484 | 14 | 2457 | 10 | 102 |
| a103 | 70796   | 57  | 32  | 0.44 | b.d. | 0.5004  | 1.7 | 12.47   | 1.9 | 0.1807 | 0.7 | 0.92 | 2616 | 37 | 2640 | 18 | 2659 | 12 | 98  |
| a104 | 288673  | 232 | 140 | 0.93 | b.d. | 0.5066  | 1.6 | 12.7600 | 1.6 | 0.1827 | 0.4 | 0.97 | 2642 | 34 | 2662 | 15 | 2677 | 7  | 99  |
| a16  | 141173  | 111 | 73  | 1.20 | b.d. | 0.5135  | 1.6 | 13.1500 | 1.8 | 0.1858 | 0.7 | 0.92 | 2672 | 36 | 2691 | 17 | 2705 | 12 | 99  |
| a6   | 248673  | 233 | 140 | 0.50 | 0.08 | 0.5142  | 1.6 | 12.89   | 1.7 | 0.1818 | 0.6 | 0.94 | 2675 | 35 | 2672 | 16 | 2670 | 10 | 100 |
| a45  | 86717   | 69  | 44  | 1.05 | 0.07 | 0.5155  | 1.6 | 13.24   | 1.8 | 0.1863 | 0.8 | 0.89 | 2680 | 35 | 2697 | 17 | 2710 | 13 | 99  |
| a38  | 67620   | 53  | 36  | 1.18 | 0.72 | 0.5216  | 1.4 | 13.36   | 1.9 | 0.1857 | 1.2 | 0.78 | 2706 | 32 | 2705 | 18 | 2704 | 19 | 100 |
| a24  | 37629   | 28  | 22  | 1.91 | b.d. | 0.5234  | 1.8 | 13.43   | 2.0 | 0.1861 | 0.9 | 0.90 | 2714 | 39 | 2710 | 19 | 2708 | 14 | 100 |
| a2   | 1269329 | 187 | 120 | 0.87 | b.d. | 0.5307  | 1.6 | 14.04   | 1.6 | 0.1919 | 0.5 | 0.95 | 2744 | 35 | 2752 | 16 | 2759 | 8  | 99  |
| a90  | 436233  | 345 | 200 | 0.29 | b.d. | 0.5323  | 3.7 | 15.09   | 3.7 | 0.2056 | 0.3 | 1.00 | 2751 | 84 | 2821 | 36 | 2871 | 4  | 96  |
| a67  | 584517  | 447 | 260 | 0.40 | b.d. | 0.5327  | 3.8 | 14.42   | 3.8 | 0.1963 | 0.7 | 0.98 | 2753 | 85 | 2778 | 37 | 2795 | 12 | 98  |
| a28  | 268542  | 203 | 130 | 0.70 | b.d. | 0.535   | 2.0 | 14.07   | 2.1 | 0.1907 | 0.7 | 0.94 | 2763 | 45 | 2754 | 21 | 2748 | 12 | 101 |
| a12  | 180555  | 136 | 96  | 1.24 | 0.87 | 0.5374  | 1.4 | 13.96   | 1.5 | 0.1884 | 0.7 | 0.90 | 2773 | 31 | 2747 | 15 | 2729 | 11 | 102 |
| a34  | 318051  | 243 | 160 | 0.65 | b.d. | 0.55300 | 2.2 | 14.57   | 2.3 | 0.1911 | 0.8 | 0.94 | 2838 | 50 | 2788 | 22 | 2752 | 13 | 103 |
| a117 | 67931   | 42  | 28  | 0.73 | b.d. | 0.55380 | 1.7 | 15.91   | 1.8 | 0.2083 | 0.7 | 0.93 | 2841 | 39 | 2871 | 18 | 2892 | 11 | 98  |
| a109 | 110477  | 63  | 43  | 0.69 | b.d. | 0.57530 | 1.6 | 17.66   | 1.7 | 0.2226 | 0.6 | 0.95 | 2929 | 39 | 2971 | 17 | 3000 | 9  | 98  |
