# Supplementary material for: Provenance of lower Palaeozoic metasediments of the East Odenwald (Mid-German-Crystalline Zone, Variscides)—a correlation with the East European Platform (Poland)
Source: Springer Nature journal article supplement (doi:10.1007/s00531-021-02103-y), 2021-09-21
Supplement: MOESM9 [file 531_2021_2103_MOESM9_ESM.pdf]

| locality | Decimal Grad         | Age             | Rock type              |
|----------|----------------------|-----------------|------------------------|
| 1        | 49.752695, 8.908737  | 423 Ma          | Granodiorite gneiss    |
| 2        | 49.752695, 8.908737  | 421 Ma          | Paragneiss             |
| 3        | 49.804863, 8.903258  | 415 Ma (425 Ma) | Orthogneiss            |
| 4        | 49.907004, 9.004865  | 400Ma (420 Ma)  | Orthogneiss            |
| 5        | 49.805284, 8.902890  | 419 Ma          | Paragneiss             |
| 6        | 49.815472, 9.023438  | 471 Ma          | Paragneiss             |
| 7        | 50.888889, 20.856944 | 555 Ma          | Sandstone              |
| 8        | 49.841545, 8.955723  | 351 Ma          | Orthogneiss            |
| 9        | 49.738257, 8.891371  | 405 Ma          | Orthogneiss            |
|          |                      |                 | Reischmann et al. 2001 |
| 10       | 49.815515, 9.024224  | 351 Ma          | Diorite                |
|          |                      |                 | Kirchner & Albert 2020 |
