# Supplementary material for: Provenance of lower Palaeozoic metasediments of the East Odenwald (Mid-German-Crystalline Zone, Variscides)—a correlation with the East European Platform (Poland)
Source: Springer Nature journal article supplement (doi:10.1007/s00531-021-02103-y), 2021-09-21
Supplement: MOESM10 [file 531_2021_2103_MOESM10_ESM.pdf]

## Explanation of electronic supplementary material

Table 1 Analyse table of LA-ICP-MS data of detrital zircons from metagranodiorite of the sample 1 (Weichberg, East Odenwald, MGCZ). Spot size = 30µm depth of crater ~15µm.  $^{206}\text{Pb}/^{238}\text{U}$  error is the quadratic additions of the within run precision (2 SE) and the external reproducibility (2 SD) of the reference zircon.  $^{207}\text{Pb}/^{206}\text{Pb}$  error propagation ( $^{207}\text{Pb}$  signal dependent) following Gerdes and Zeh (2009).  $^{207}\text{Pb}/^{235}\text{U}$  error is the quadratic addition of the  $^{207}\text{Pb}/^{206}\text{Pb}$  and  $^{206}\text{Pb}/^{238}\text{U}$  uncertainty.

<sup>a</sup> Within run background-corrected mean  $^{207}\text{Pb}$  signal in cps (counts per second)

<sup>b</sup> U and Pb content and Th/U ratio were calculated relative to GJ-1 reference zircon

<sup>c</sup> percentage of the common Pb on the  $^{206}\text{Pb}$ . b.d. = below detection limit.

<sup>d</sup> corrected for background, within-run Pb/U fractionation (in case of  $^{206}\text{Pb}/^{238}\text{U}$ ) and common Pb using Stacy and Kramers (1975) model Pb composition and subsequently normalized to GJ-1 (ID-TIMS value/measured value);  $^{207}\text{Pb}/^{235}\text{U}$  calculated using  $^{207}\text{Pb}/^{206}\text{Pb}/(^{238}\text{U}/^{206}\text{Pb} * 1/137.88)$

<sup>e</sup> rho is the  $^{206}\text{Pb}/^{238}\text{U}/^{207}\text{Pb}/^{235}\text{U}$  error correlation coefficient.

<sup>f</sup> degree of concordance =  $^{206}\text{Pb}/^{238}\text{U}$  age /  $^{207}\text{Pb}/^{206}\text{Pb}$  age x 100

Table 2 Analyse table of LA-ICP-MS data of detrital zircons from biotite gneiss of the sample 2 (Weichberg, East Odenwald, MGCZ). For further explanation see Table 1

Table 3 Analyse table of LA-ICP-MS data of the orthogneiss sample 3 (“Schmelzmühle”, East Odenwald). For further explanation see Table 1

Table 4 Analyse table of LA-ICP-MS data of the orthogneiss sample 4 (North Böllstein, East Odenwald). For further explanation see Table 1

Table 5 Analyse table of LA-ICP-MS data of detrital zircons from biotite gneiss of the sample 5 (“Schmelzmühle”, East Odenwald). For further explanation see Table 1

Table 6 Analyse table of LA-ICP-MS data of detrital zircons from biotite gneiss of the sample 6 (East Böllstein, East Odenwald). For further explanation see Table 1

Table 7 Analyse table of LA-ICP-MS data of detrital zircons from Upper Cambrian sandstone of the sample 6 (Lysogory, Holy Cross Mountain, Trans-European Suture Zone). For further explanation see Table 1

Table 8 Analyse table of LA-ICP-MS data of the orthogneiss sample 8 (“Wiebelsbach”, East Odenwald). For further explanation see Table 1

Table 9 Sample localities Odenwald and Holy Cross Mountains (Decimal grad)

ESM 1 Analytical techniques

ESM 2 Uranium – Thorium plot sample 1

ESM 3 Uranium – Thorium plot sample 2

ESM 4 Uranium – Thorium plot sample 3

ESM 5 Uranium – Thorium plot sample 4

ESM 6 Uranium – Thorium plot samples 5, 6 and 7

ESM 7 U–Pb concordia plots of ca 1.5 Ga age peaks of samples 5, 6 and 7

ESM 8 U–Pb concordia plot of in house standard Orlovica (TIMS /Laser)

ESM 9 Zircon Tuff age Orlovica

ESM 10 CL images sample 1

ESM 11 CL images sample 2

ESM 12 CL images sample 5

ESM 13 CL images sample 4

ESM 14 CL images sample 3

ESM 15 CL images sample 6
