# Supplementary material for: Provenance of lower Palaeozoic metasediments of the East Odenwald (Mid-German-Crystalline Zone, Variscides)—a correlation with the East European Platform (Poland)
Source: Springer Nature journal article supplement (doi:10.1007/s00531-021-02103-y), 2021-09-21
Supplement: MOESM18 [file 531_2021_2103_MOESM18_ESM.pdf]

Concordia Age TIMS =  $524 \pm 1$  Ma  
 red, n = 8  
 (95% confidence, decay-const. errs included)  
 MSWD (of concordance) = 2.4  
 Probability (of concordance) = 0.12

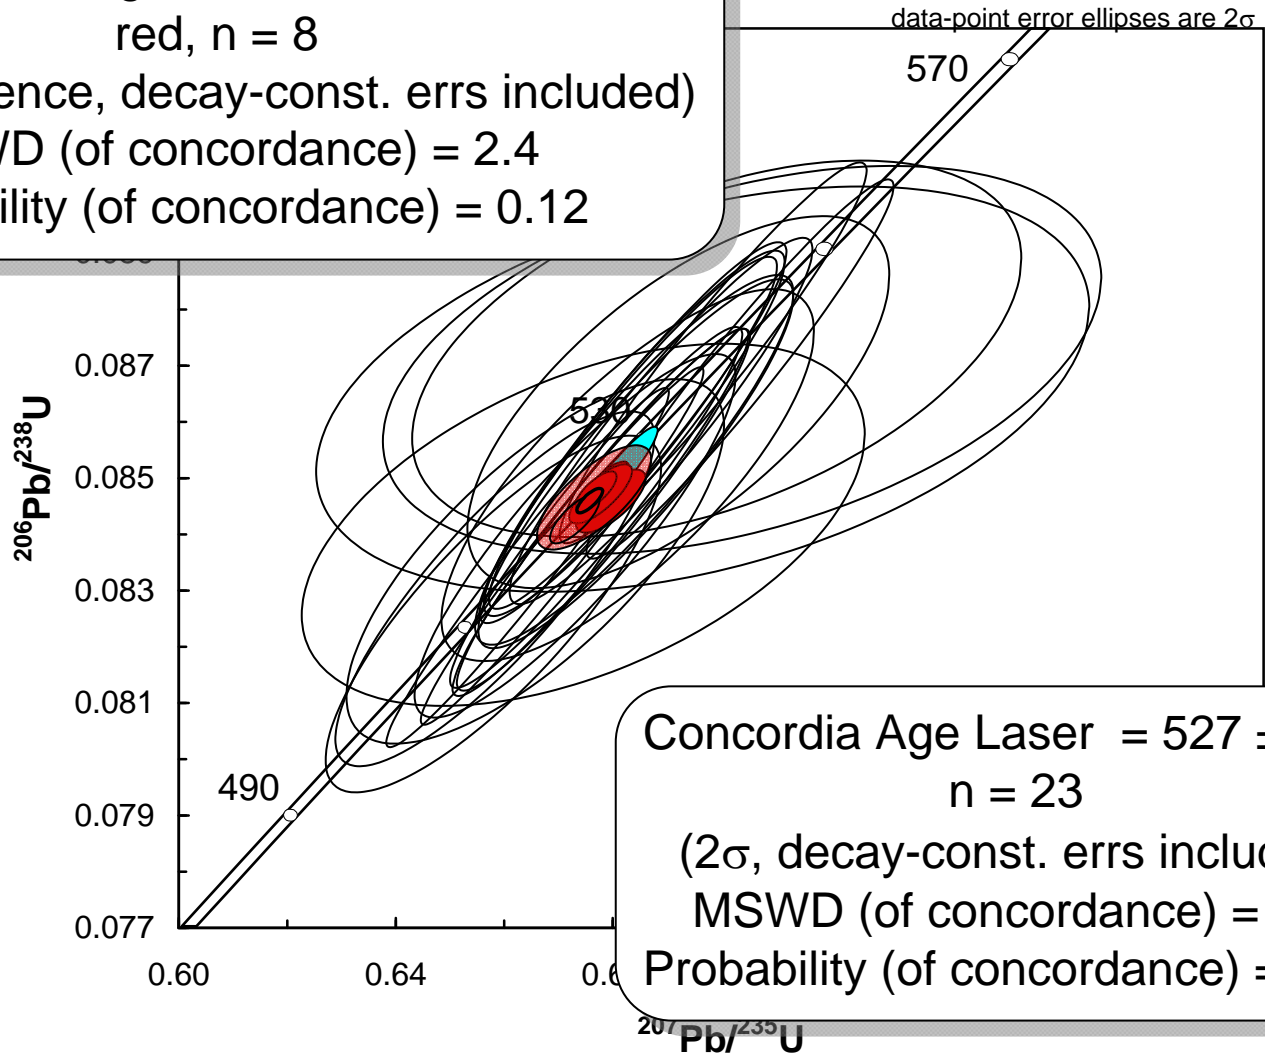

Concordia Age Laser =  $527 \pm 3$  Ma  
 n = 23  
 ( $2\sigma$ , decay-const. errs included)  
 MSWD (of concordance) = 1.7  
 Probability (of concordance) = 0.19
