# Supplementary material for: Provenance of lower Palaeozoic metasediments of the East Odenwald (Mid-German-Crystalline Zone, Variscides)—a correlation with the East European Platform (Poland)
Source: Springer Nature journal article supplement (doi:10.1007/s00531-021-02103-y), 2021-09-21
Supplement: MOESM22 [file 531_2021_2103_MOESM22_ESM.pdf]

500  $\mu\text{m}$

A black and white micrograph showing a dense field of biological structures, likely spores or cells, against a dark background. The structures vary in shape, including oval, elongated, and irregular forms. Some have distinct internal patterns or textures. A white scale bar is located in the bottom left corner, with the text '500 μm' above it.
