# Supplementary figures and images for: Provenance of lower Palaeozoic metasediments of the East Odenwald (Mid-German-Crystalline Zone, Variscides)—a correlation with the East European Platform (Poland)
Source: Springer Nature journal article supplement (doi:10.1007/s00531-021-02103-y), 2021-09-21

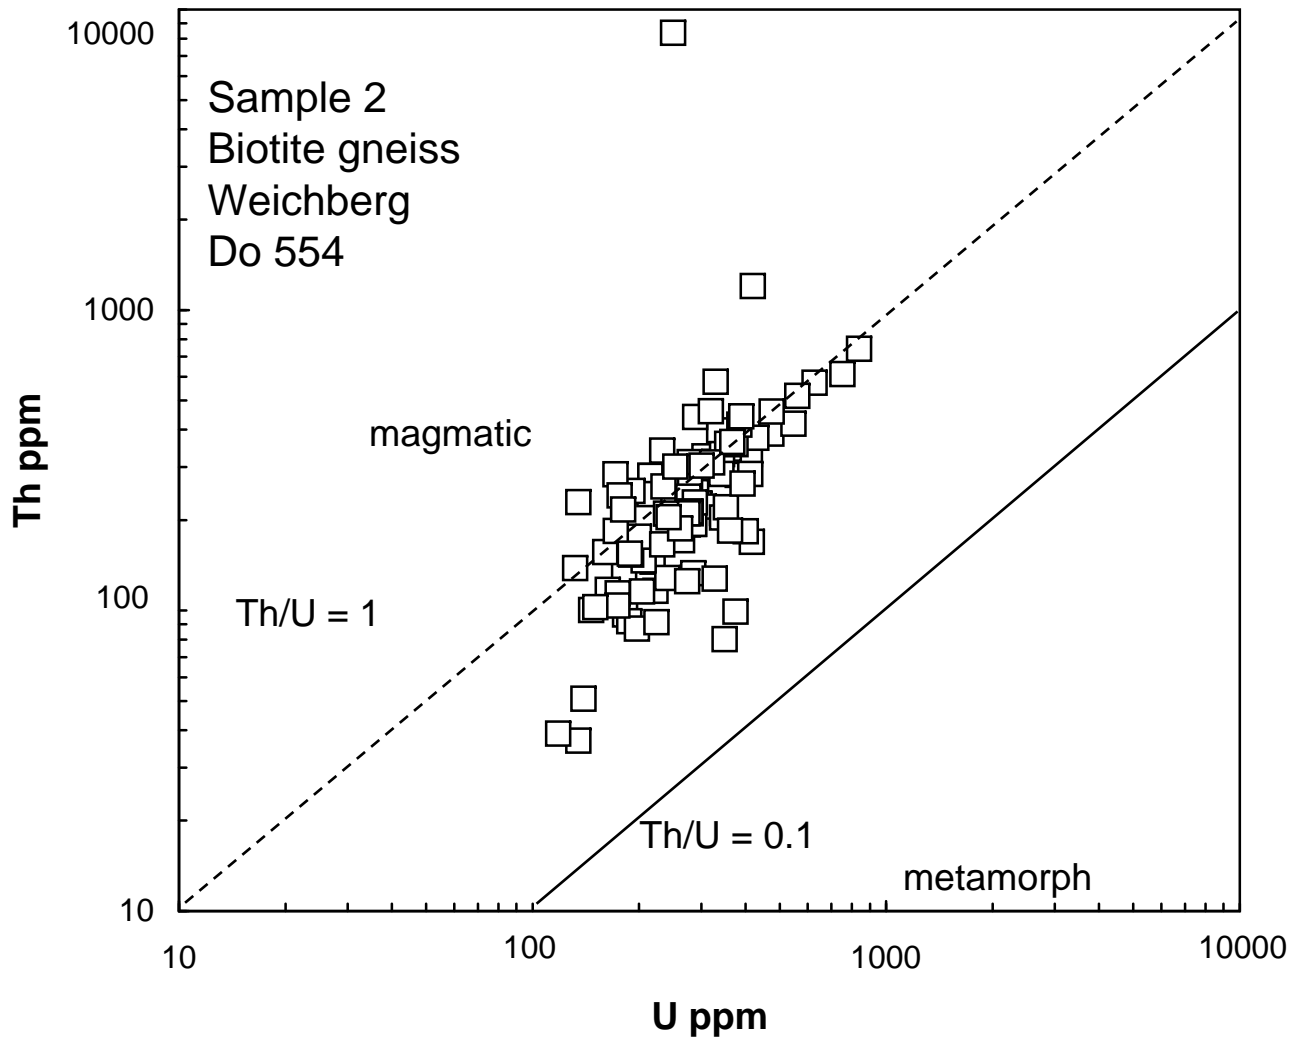

Supplement: MOESM13 [file 531_2021_2103_MOESM13_ESM.pdf]

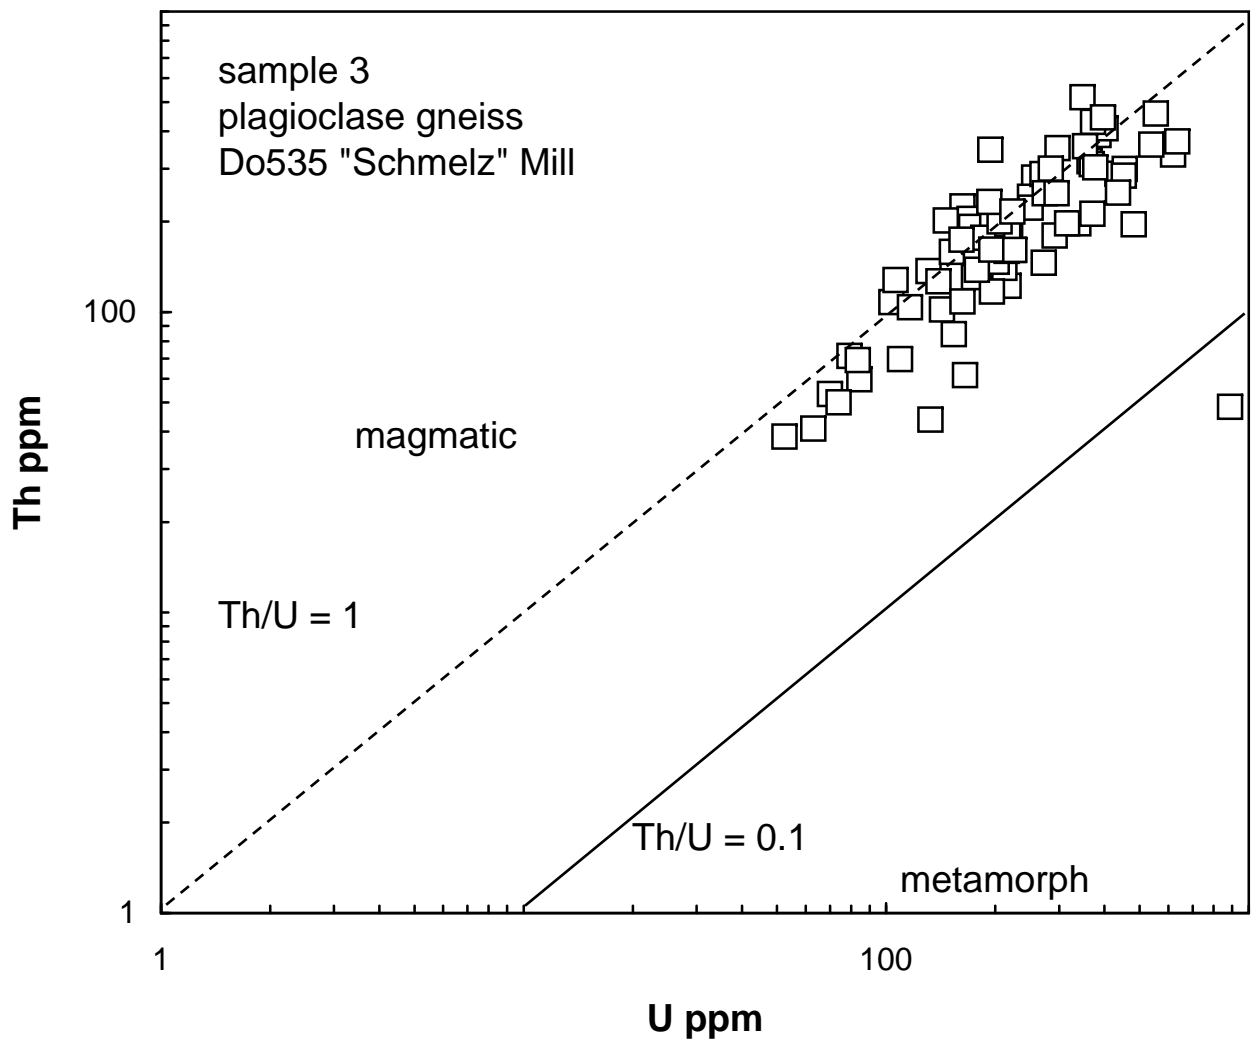

Supplement: MOESM14 [file 531_2021_2103_MOESM14_ESM.pdf]

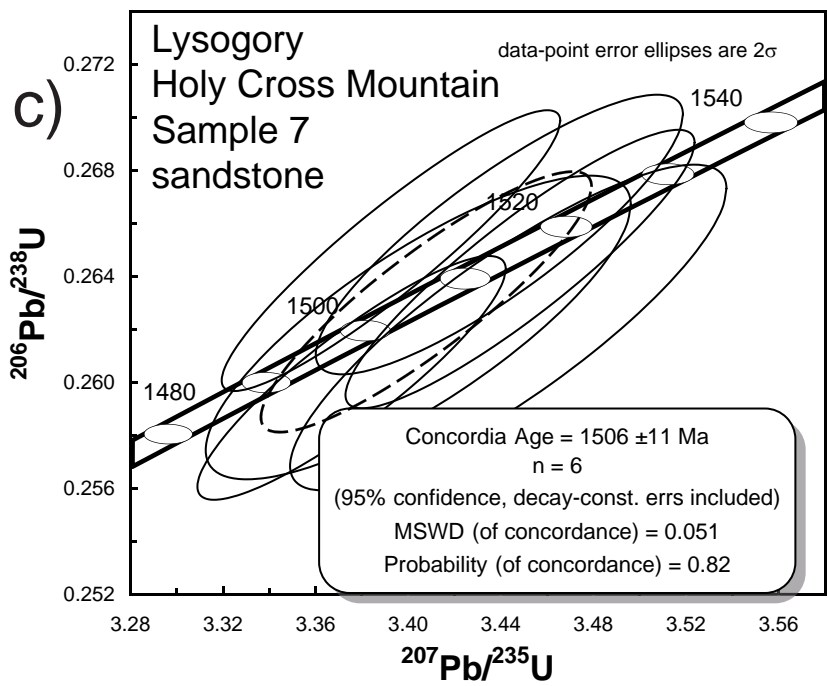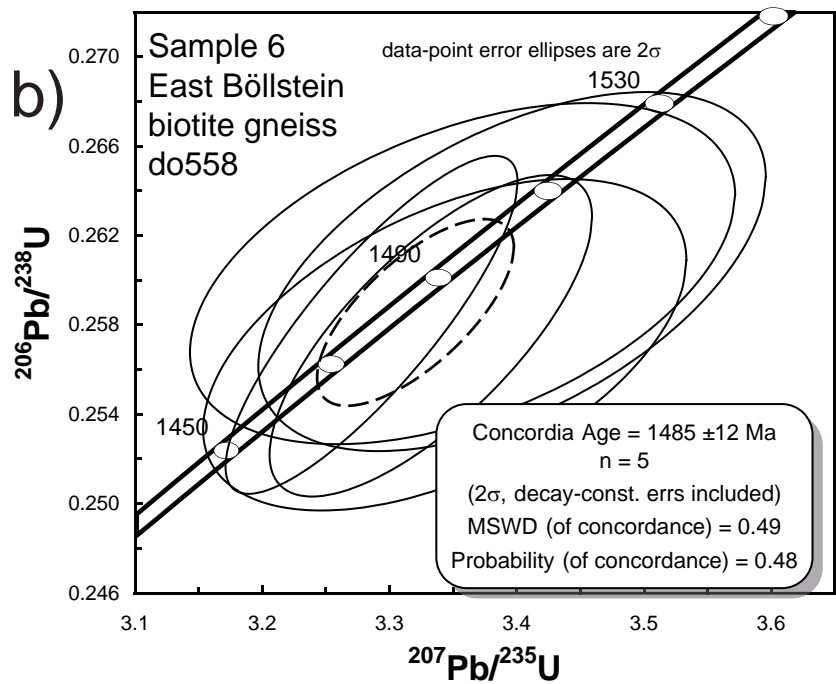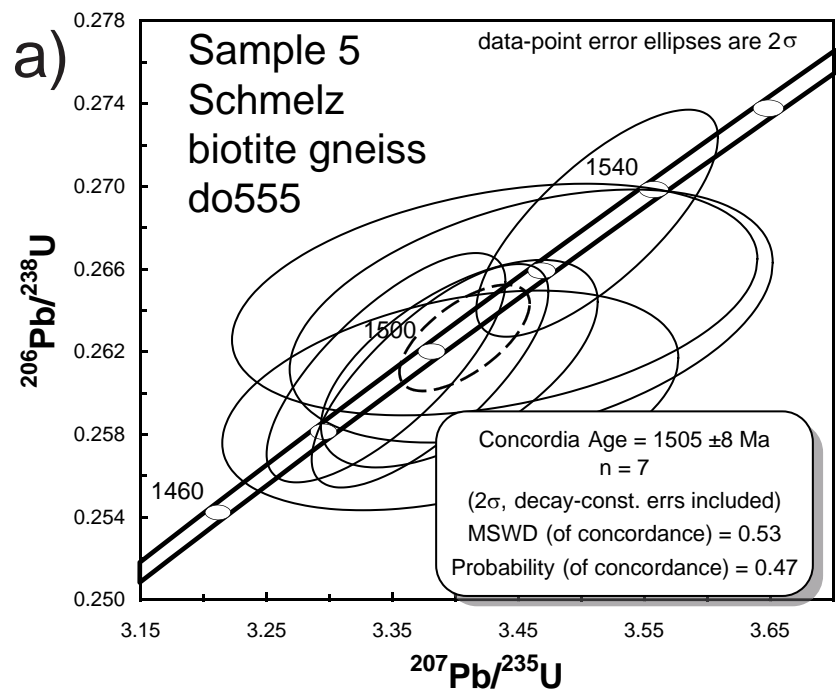

Supplement: MOESM17 [file 531_2021_2103_MOESM17_ESM.pdf]

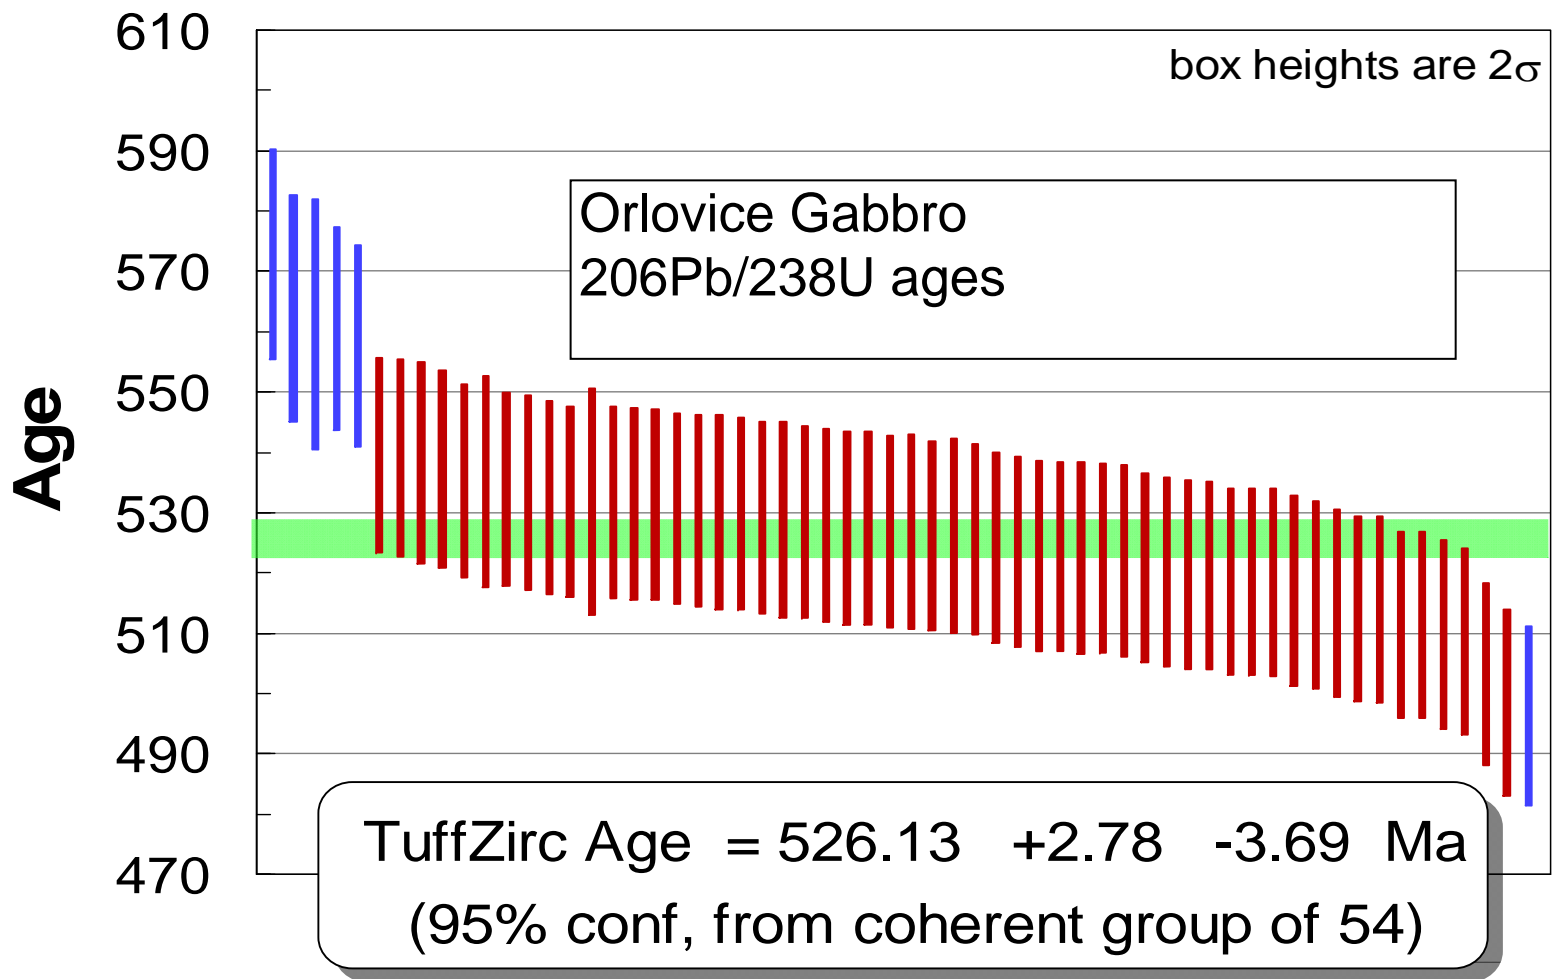

Supplement: MOESM19 [file 531_2021_2103_MOESM19_ESM.pdf]

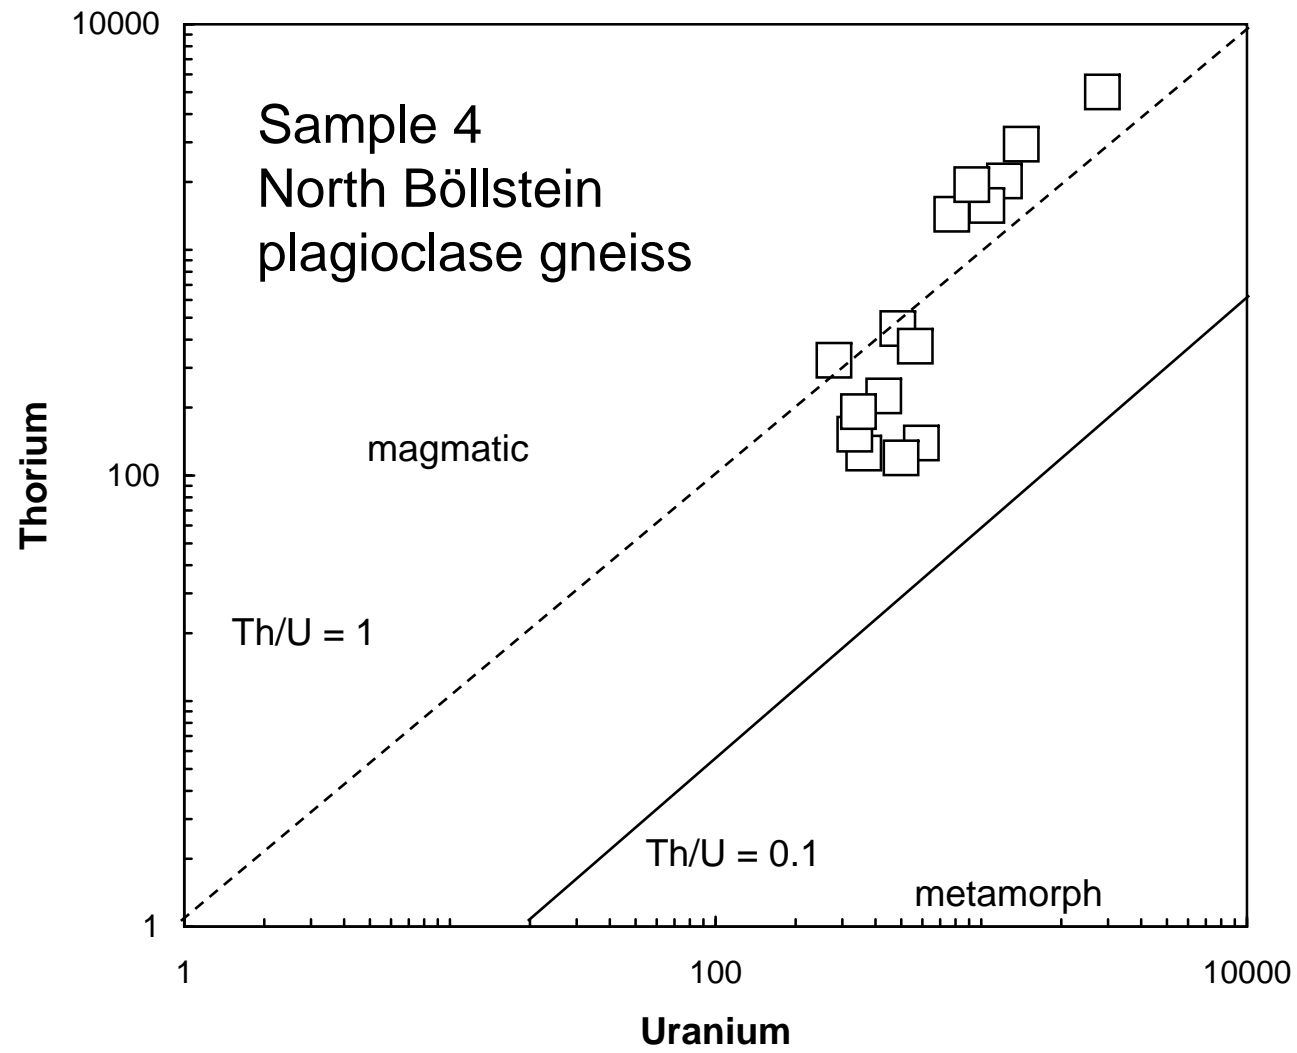

Supplement: MOESM15 [file 531_2021_2103_MOESM15_ESM.pdf]

c)

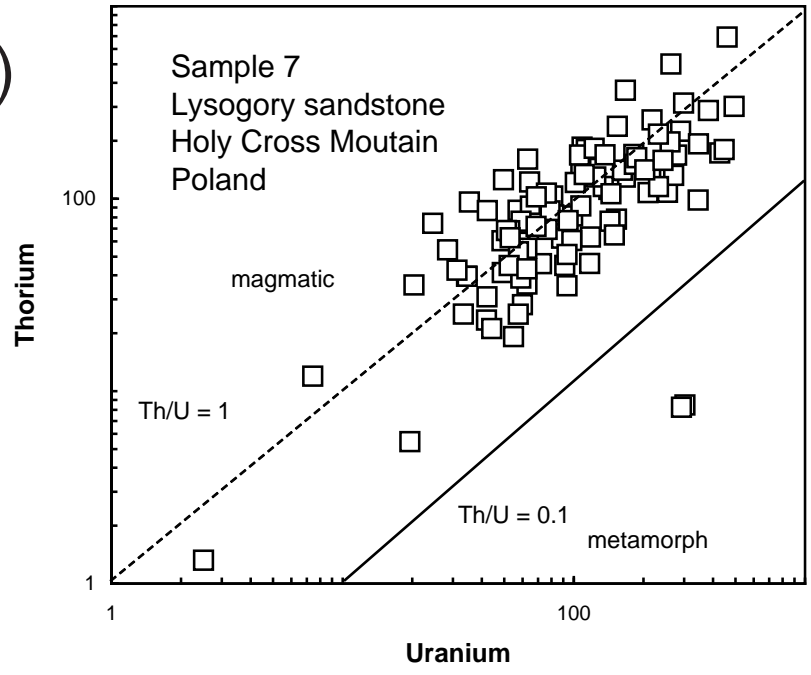

b)

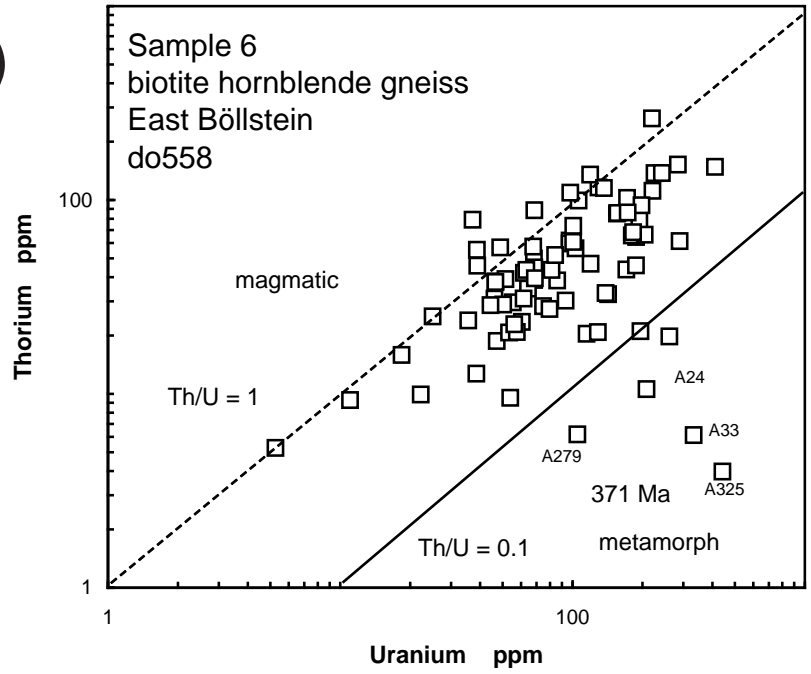

a)

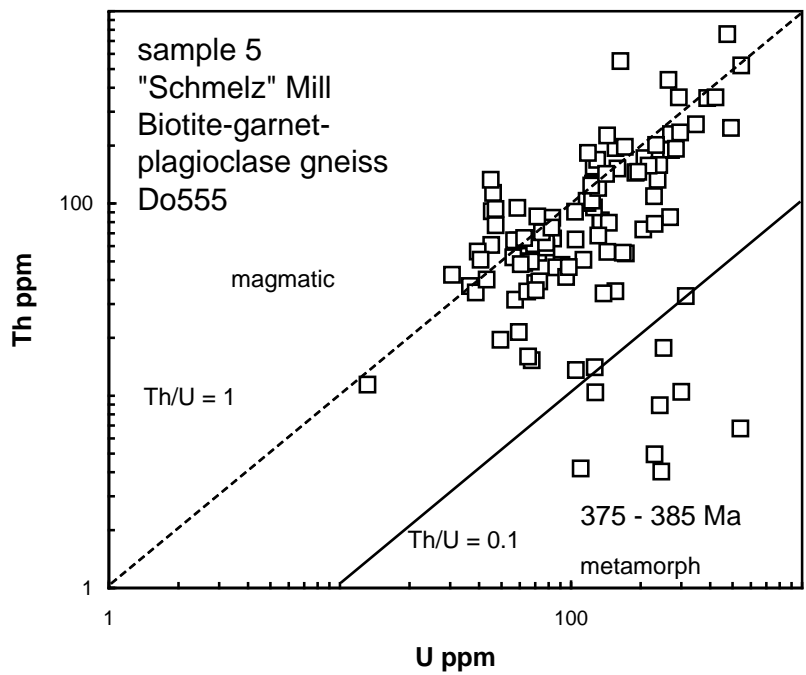

Supplement: MOESM16 [file 531_2021_2103_MOESM16_ESM.pdf]

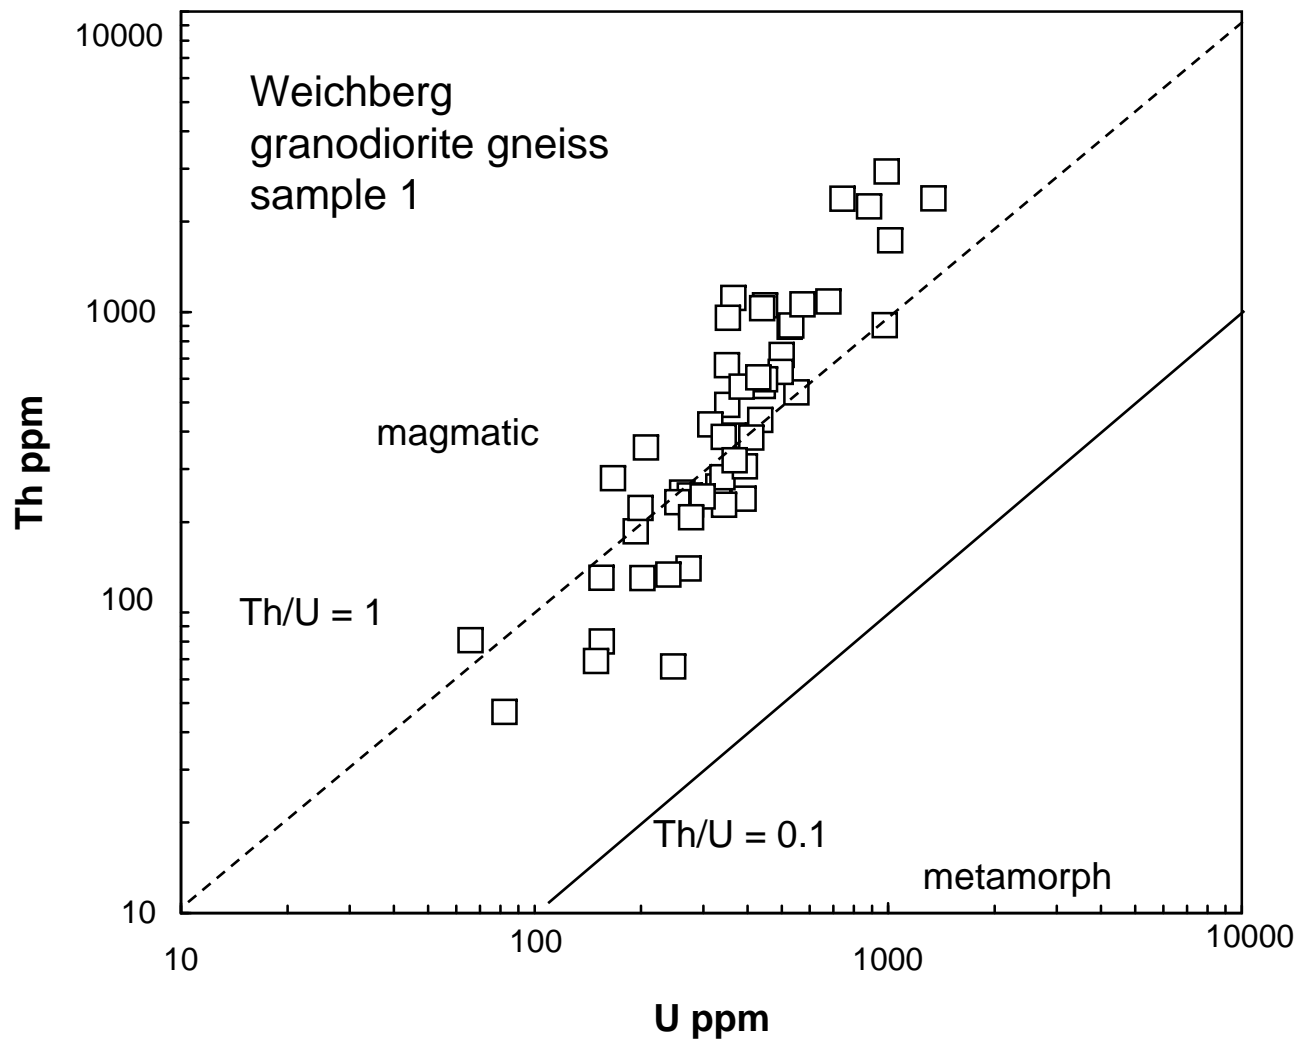

Supplement: MOESM12 [file 531_2021_2103_MOESM12_ESM.pdf]

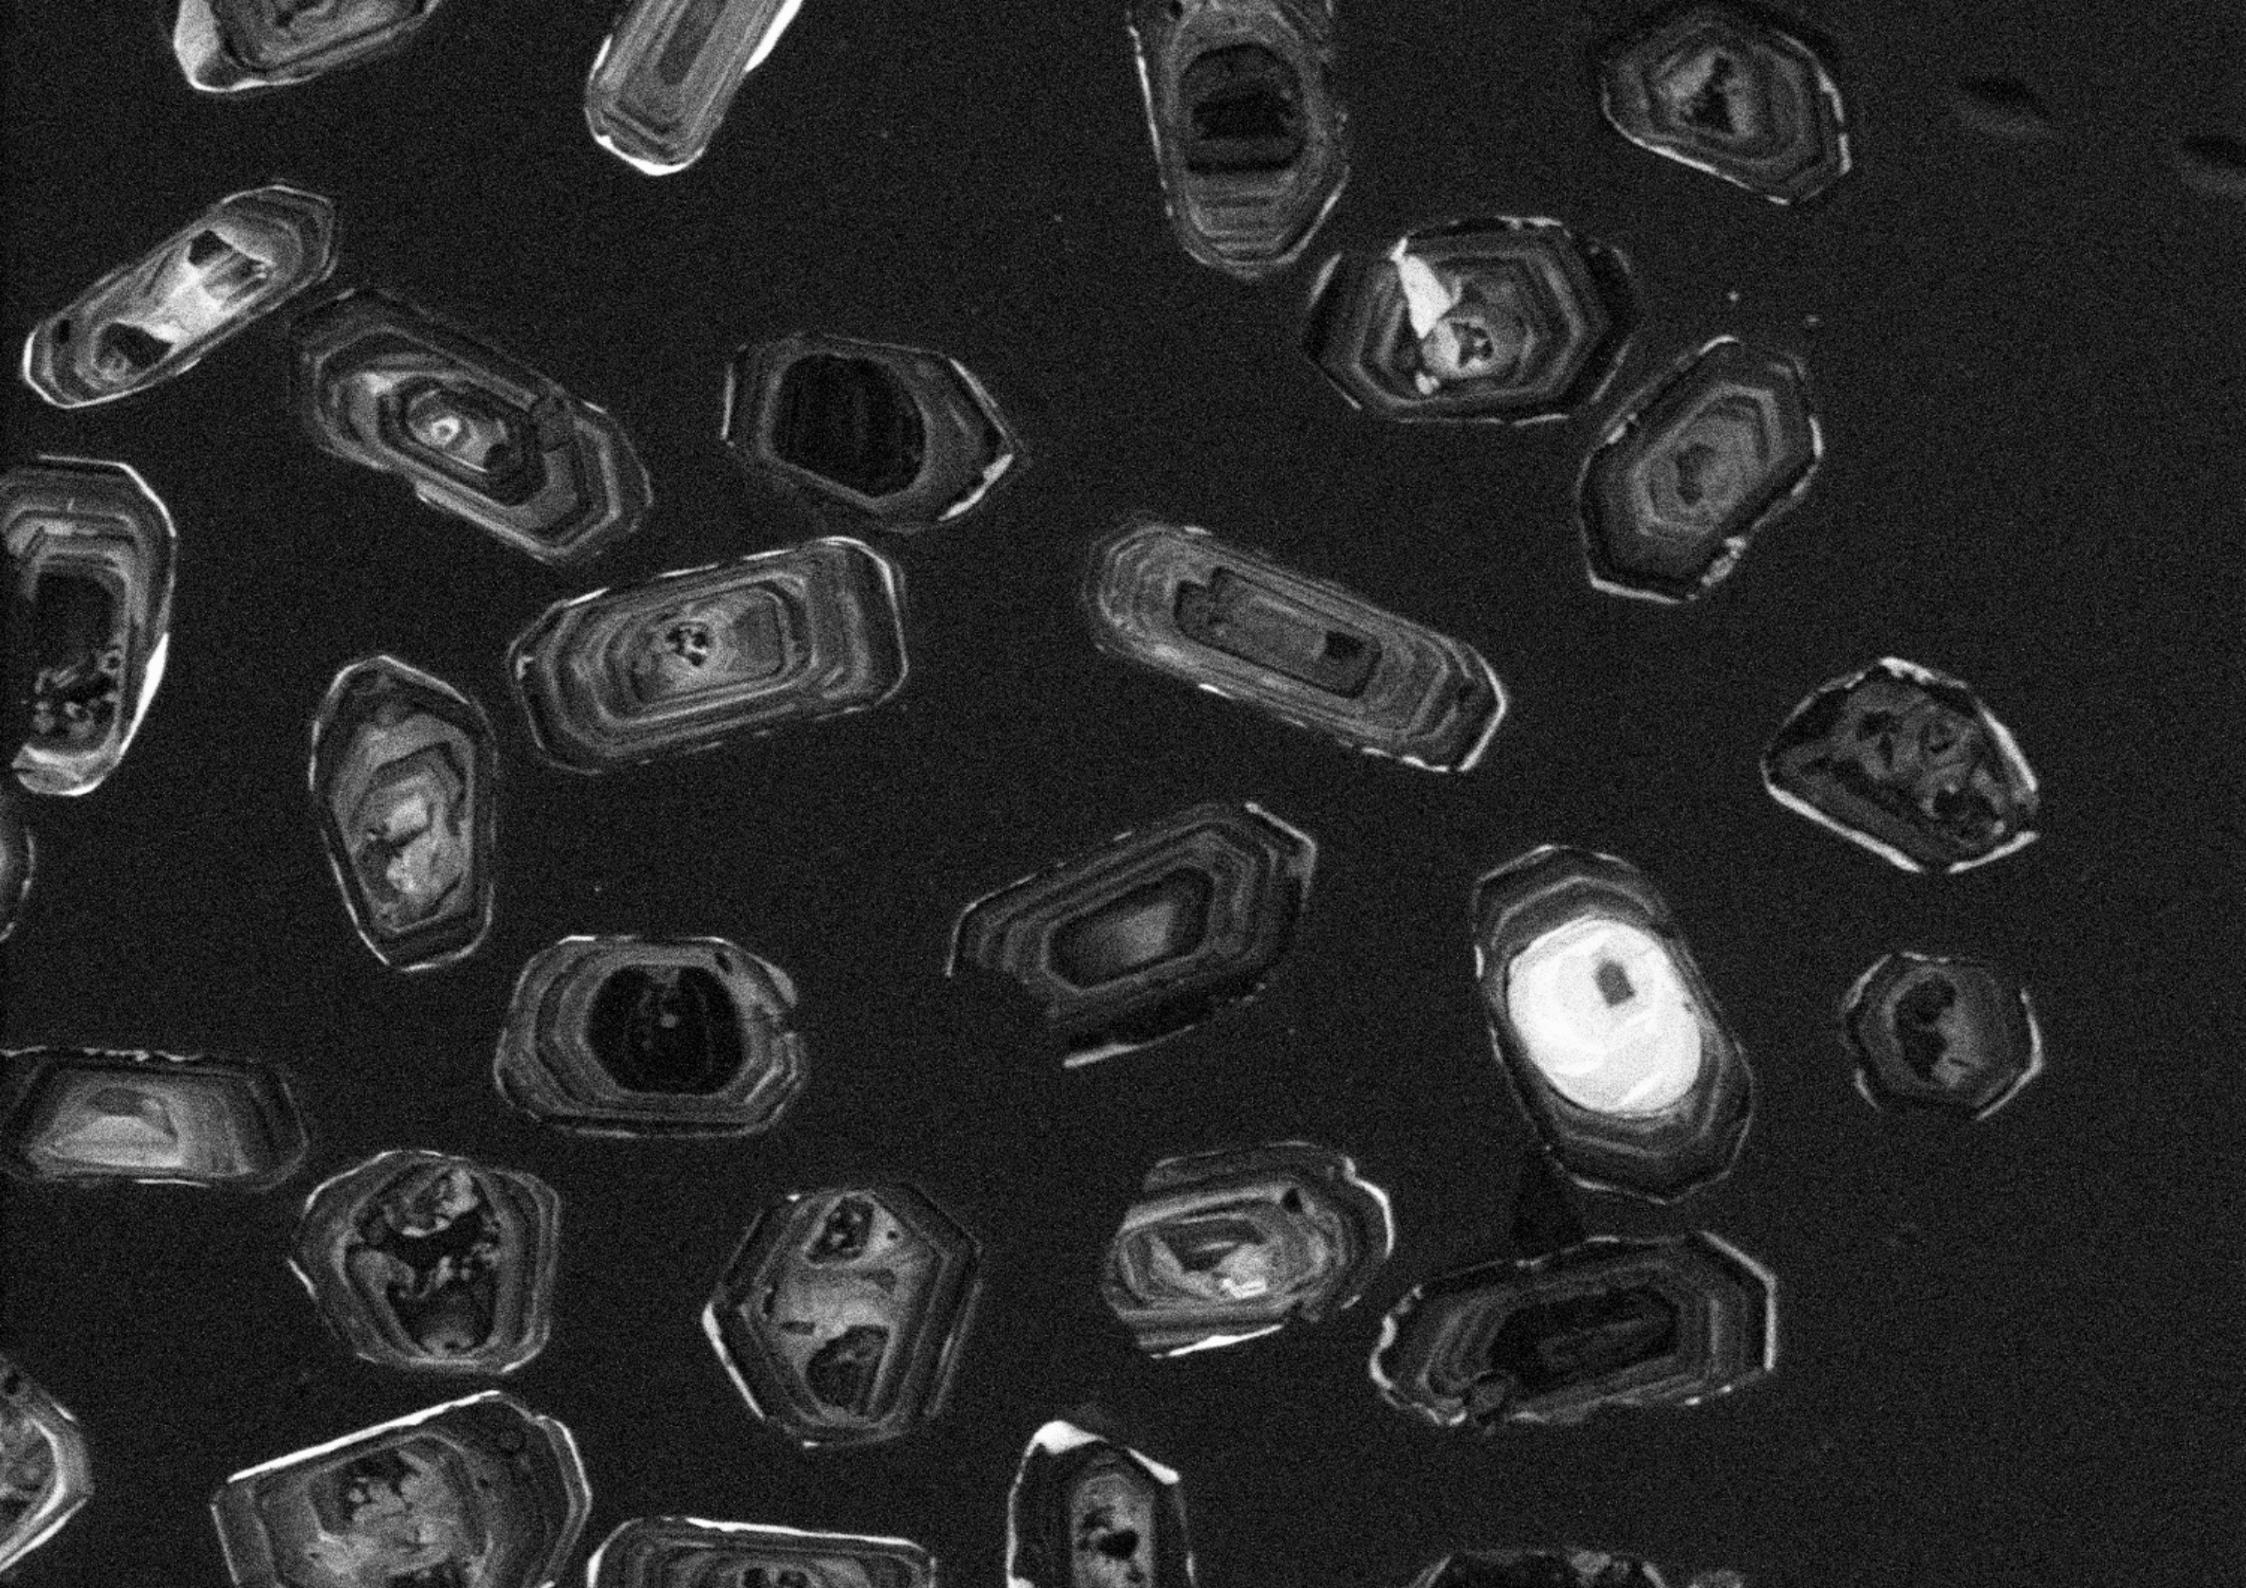

Supplement: MOESM20 [file 531_2021_2103_MOESM20_ESM.pdf]

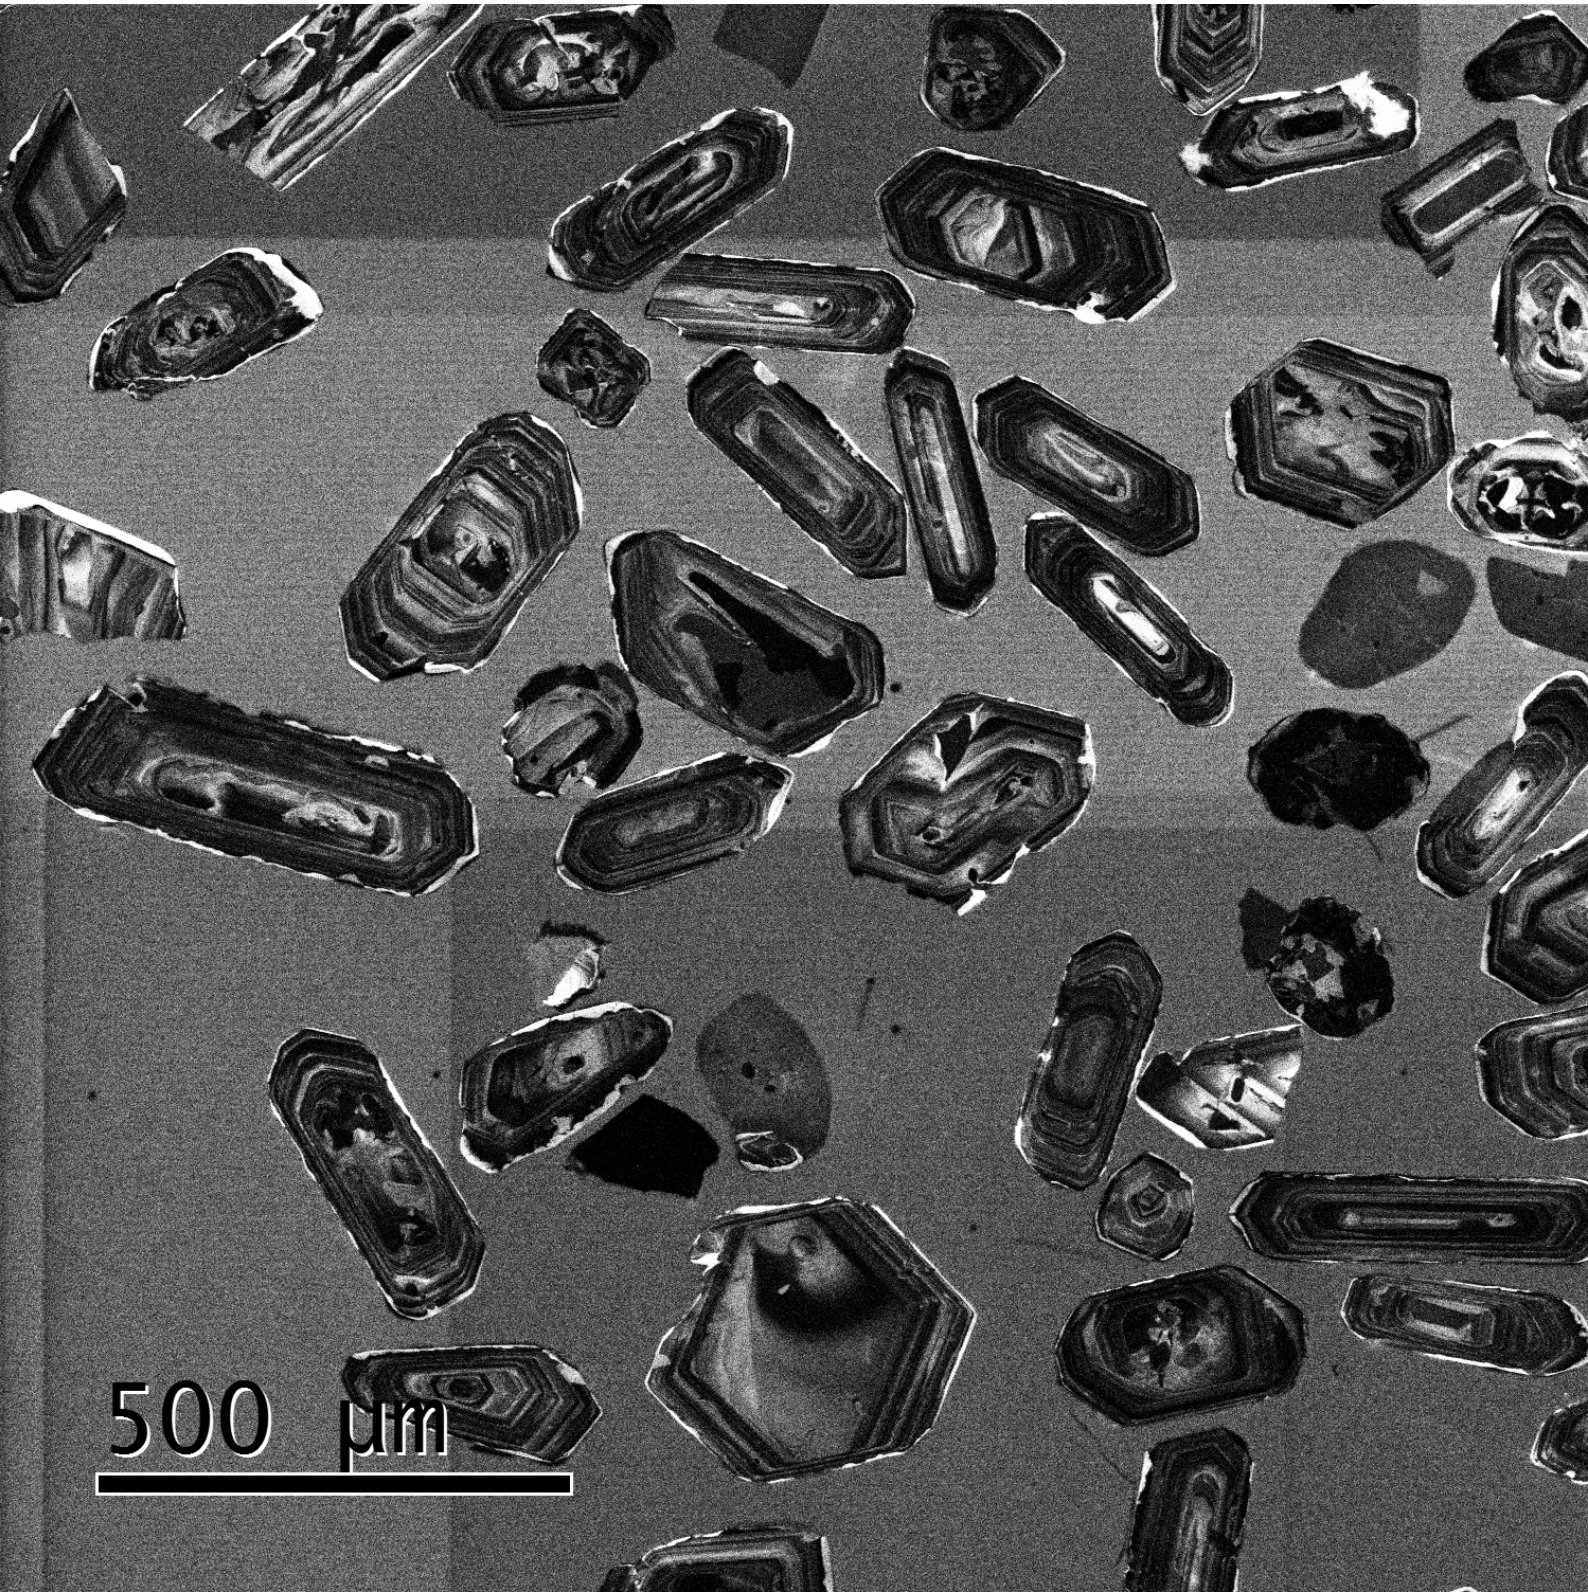

Supplement: MOESM21 [file 531_2021_2103_MOESM21_ESM.pdf]

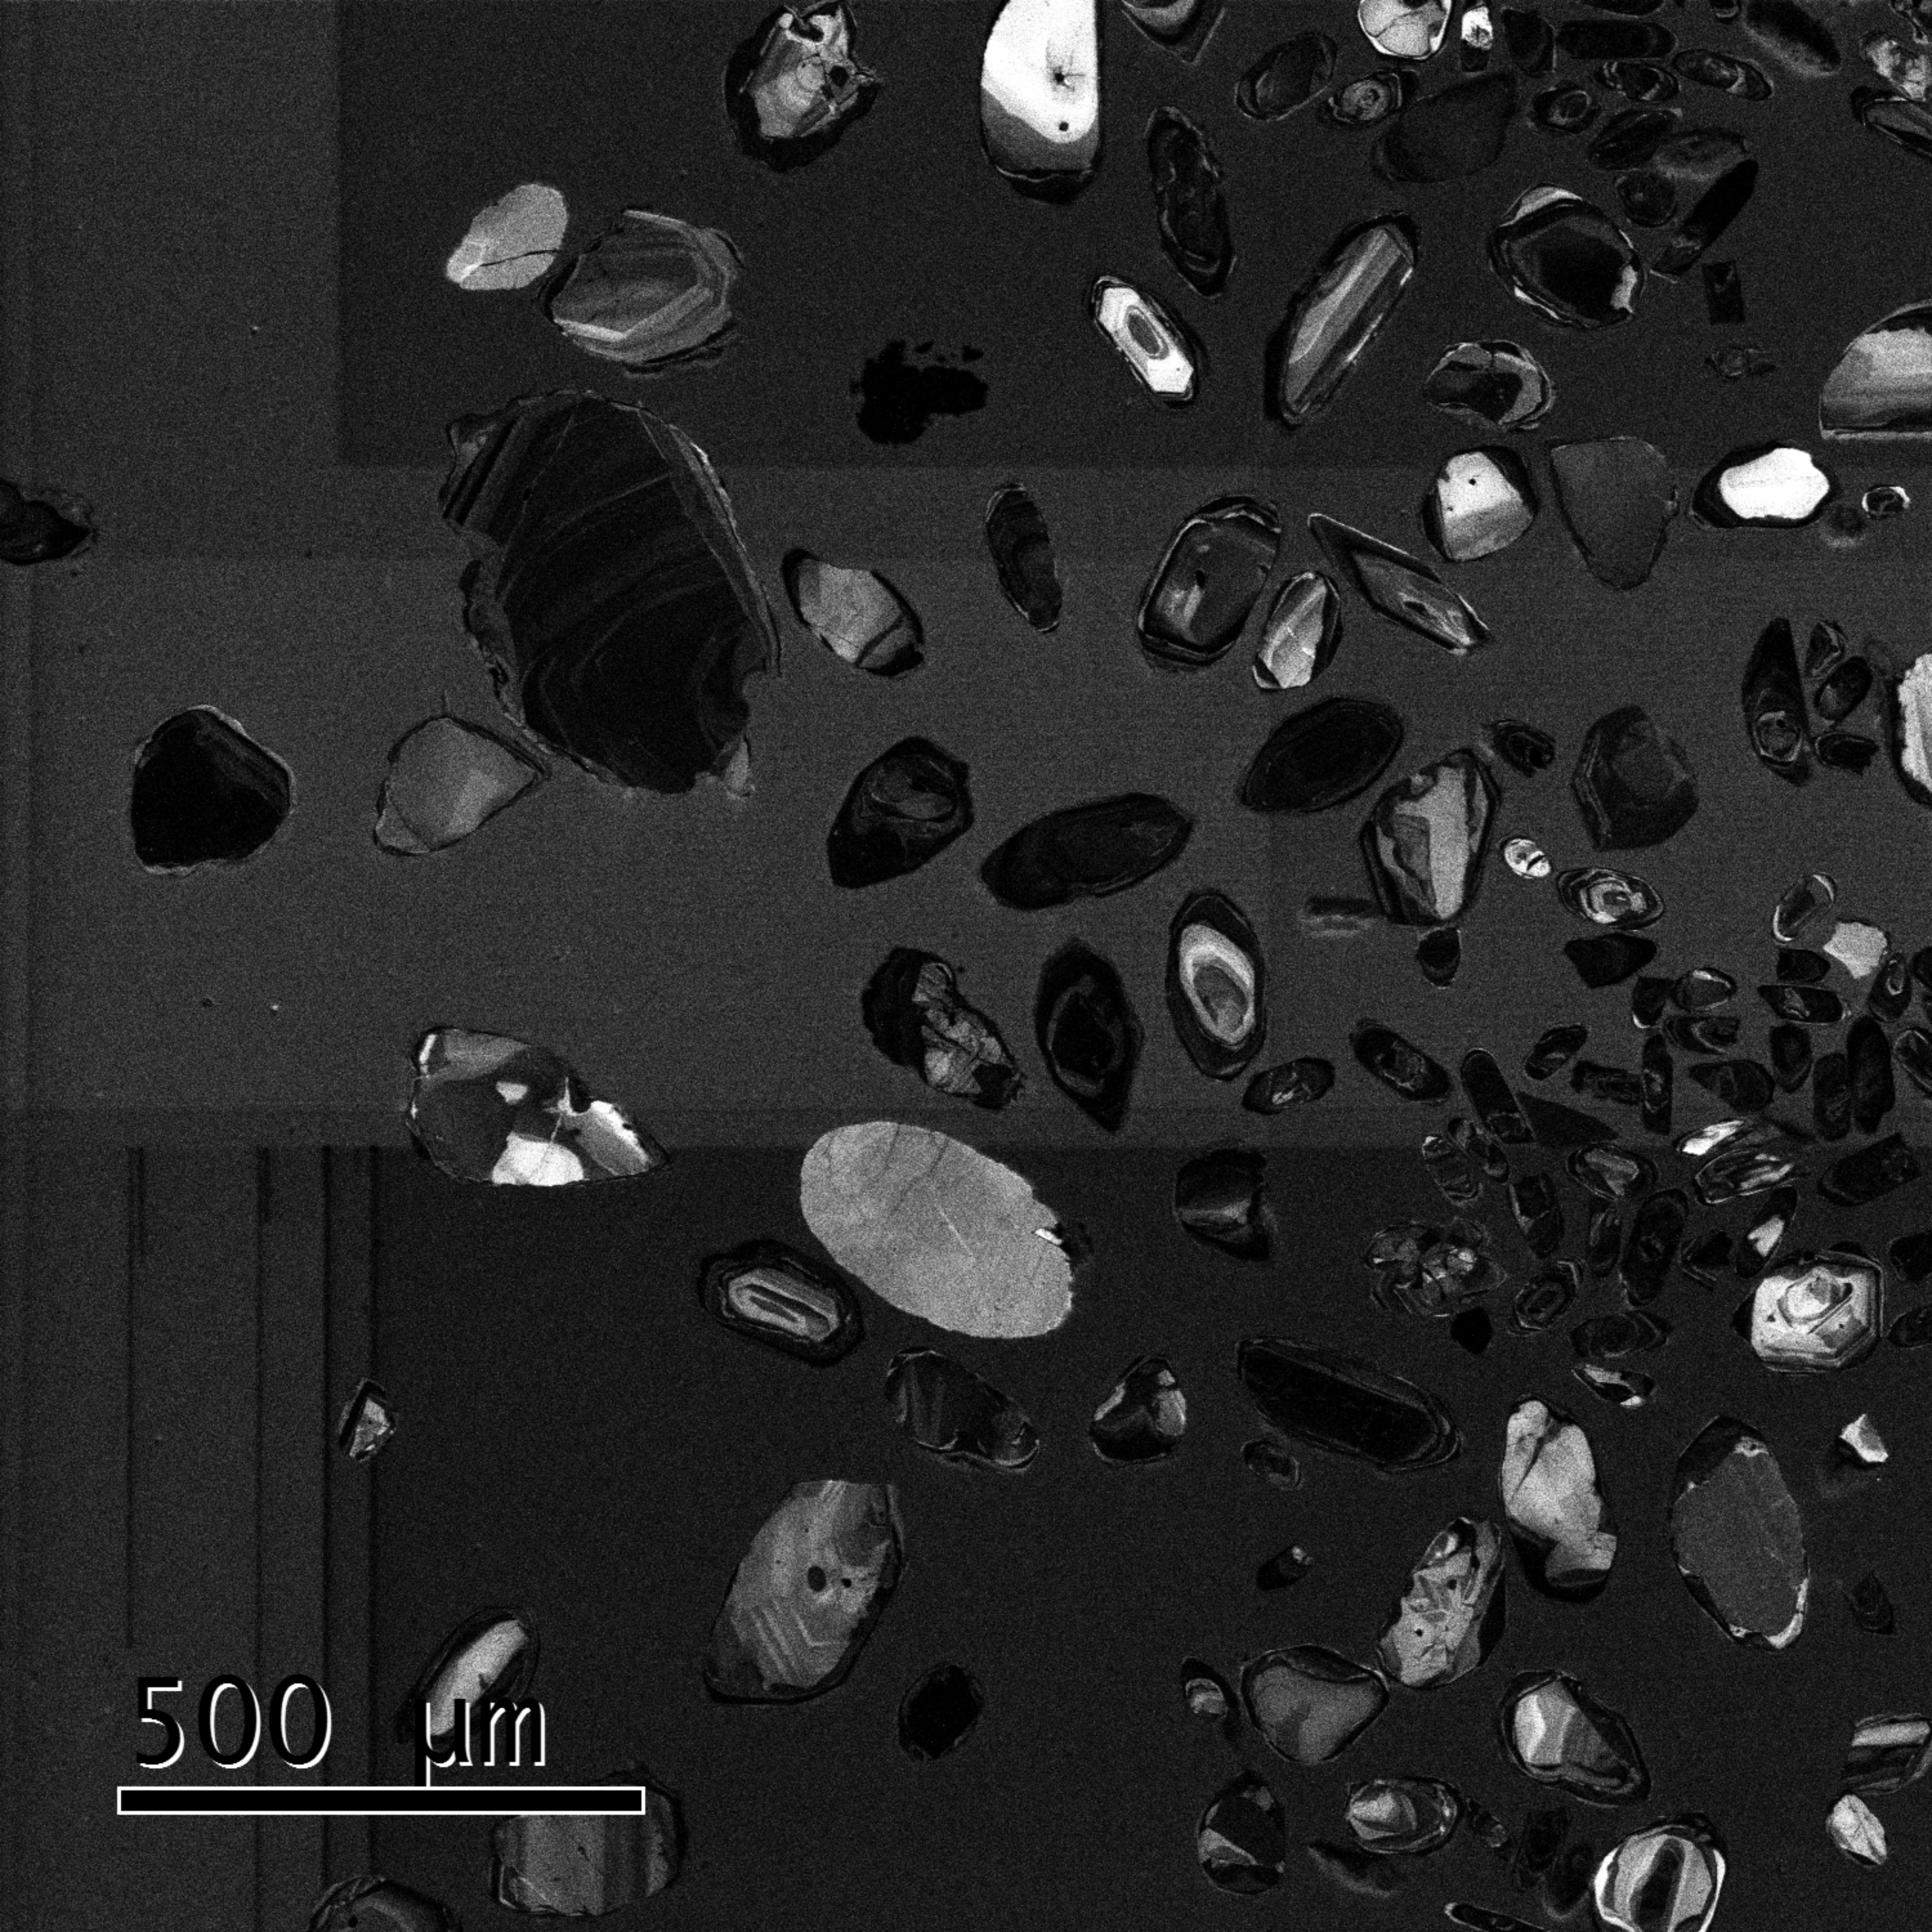

500  $\mu\text{m}$

Supplement: MOESM22 [file 531_2021_2103_MOESM22_ESM.pdf]

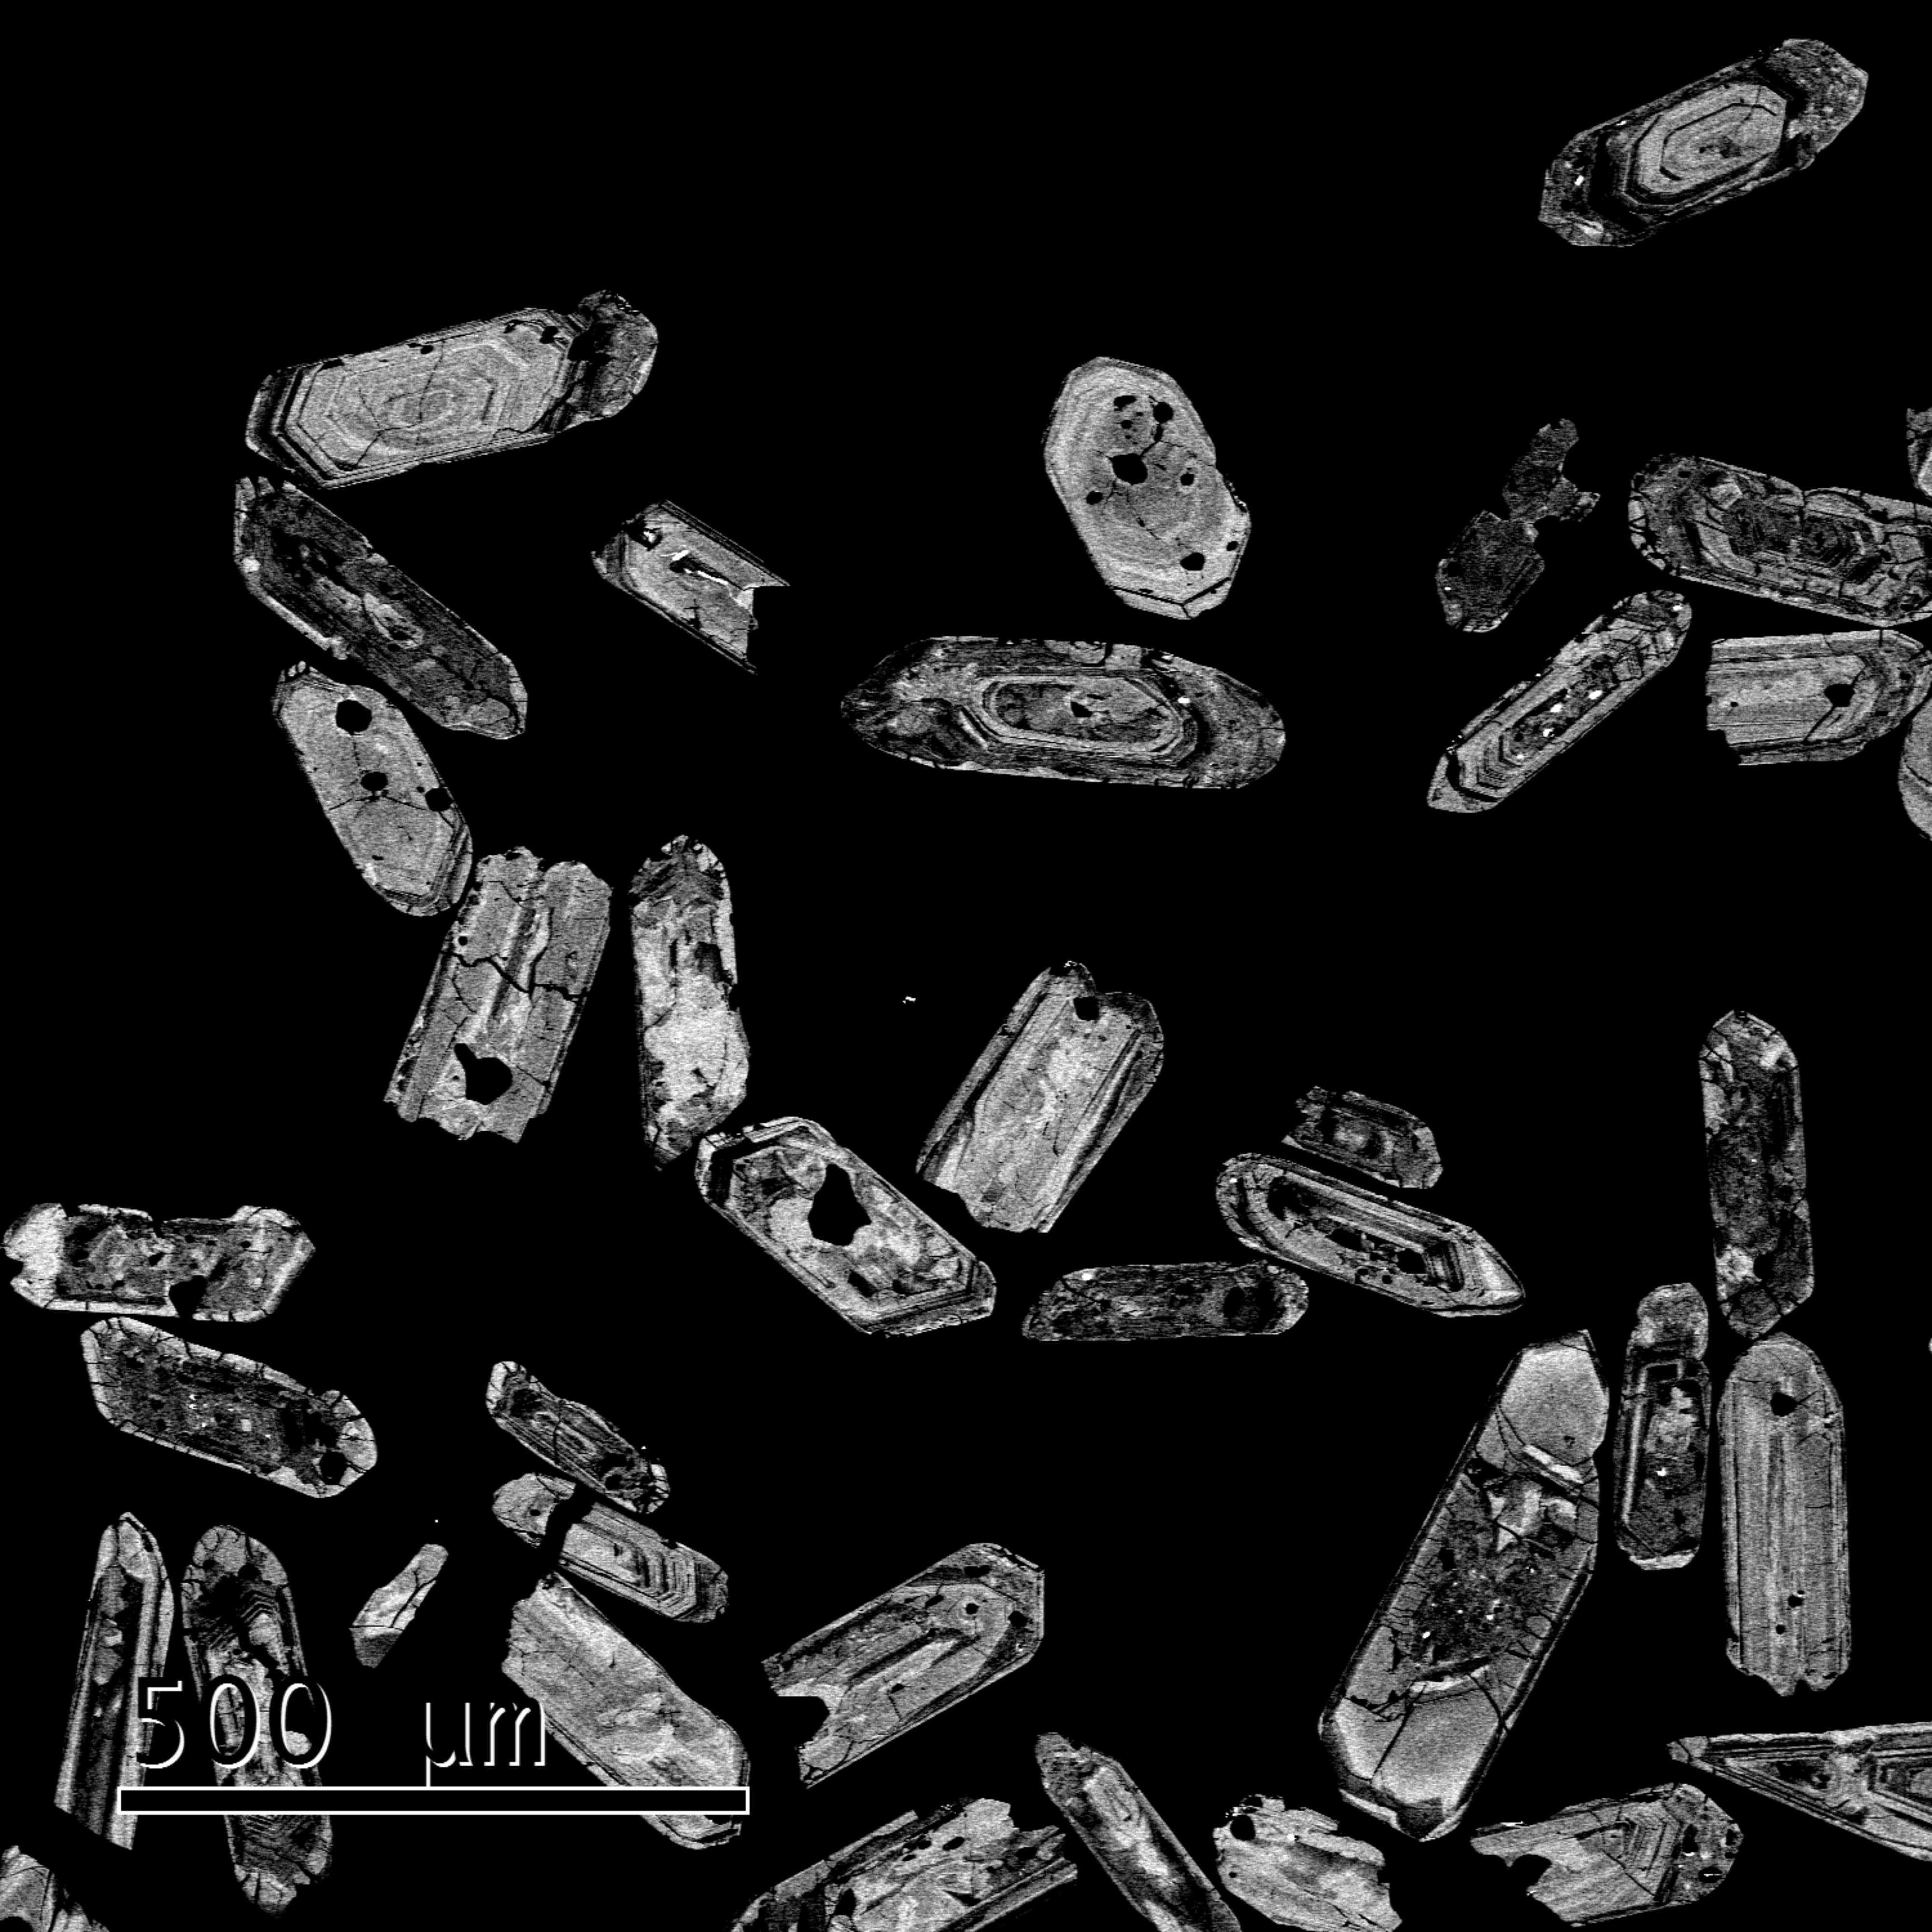

500  $\mu\text{m}$

Supplement: MOESM23 [file 531_2021_2103_MOESM23_ESM.pdf]

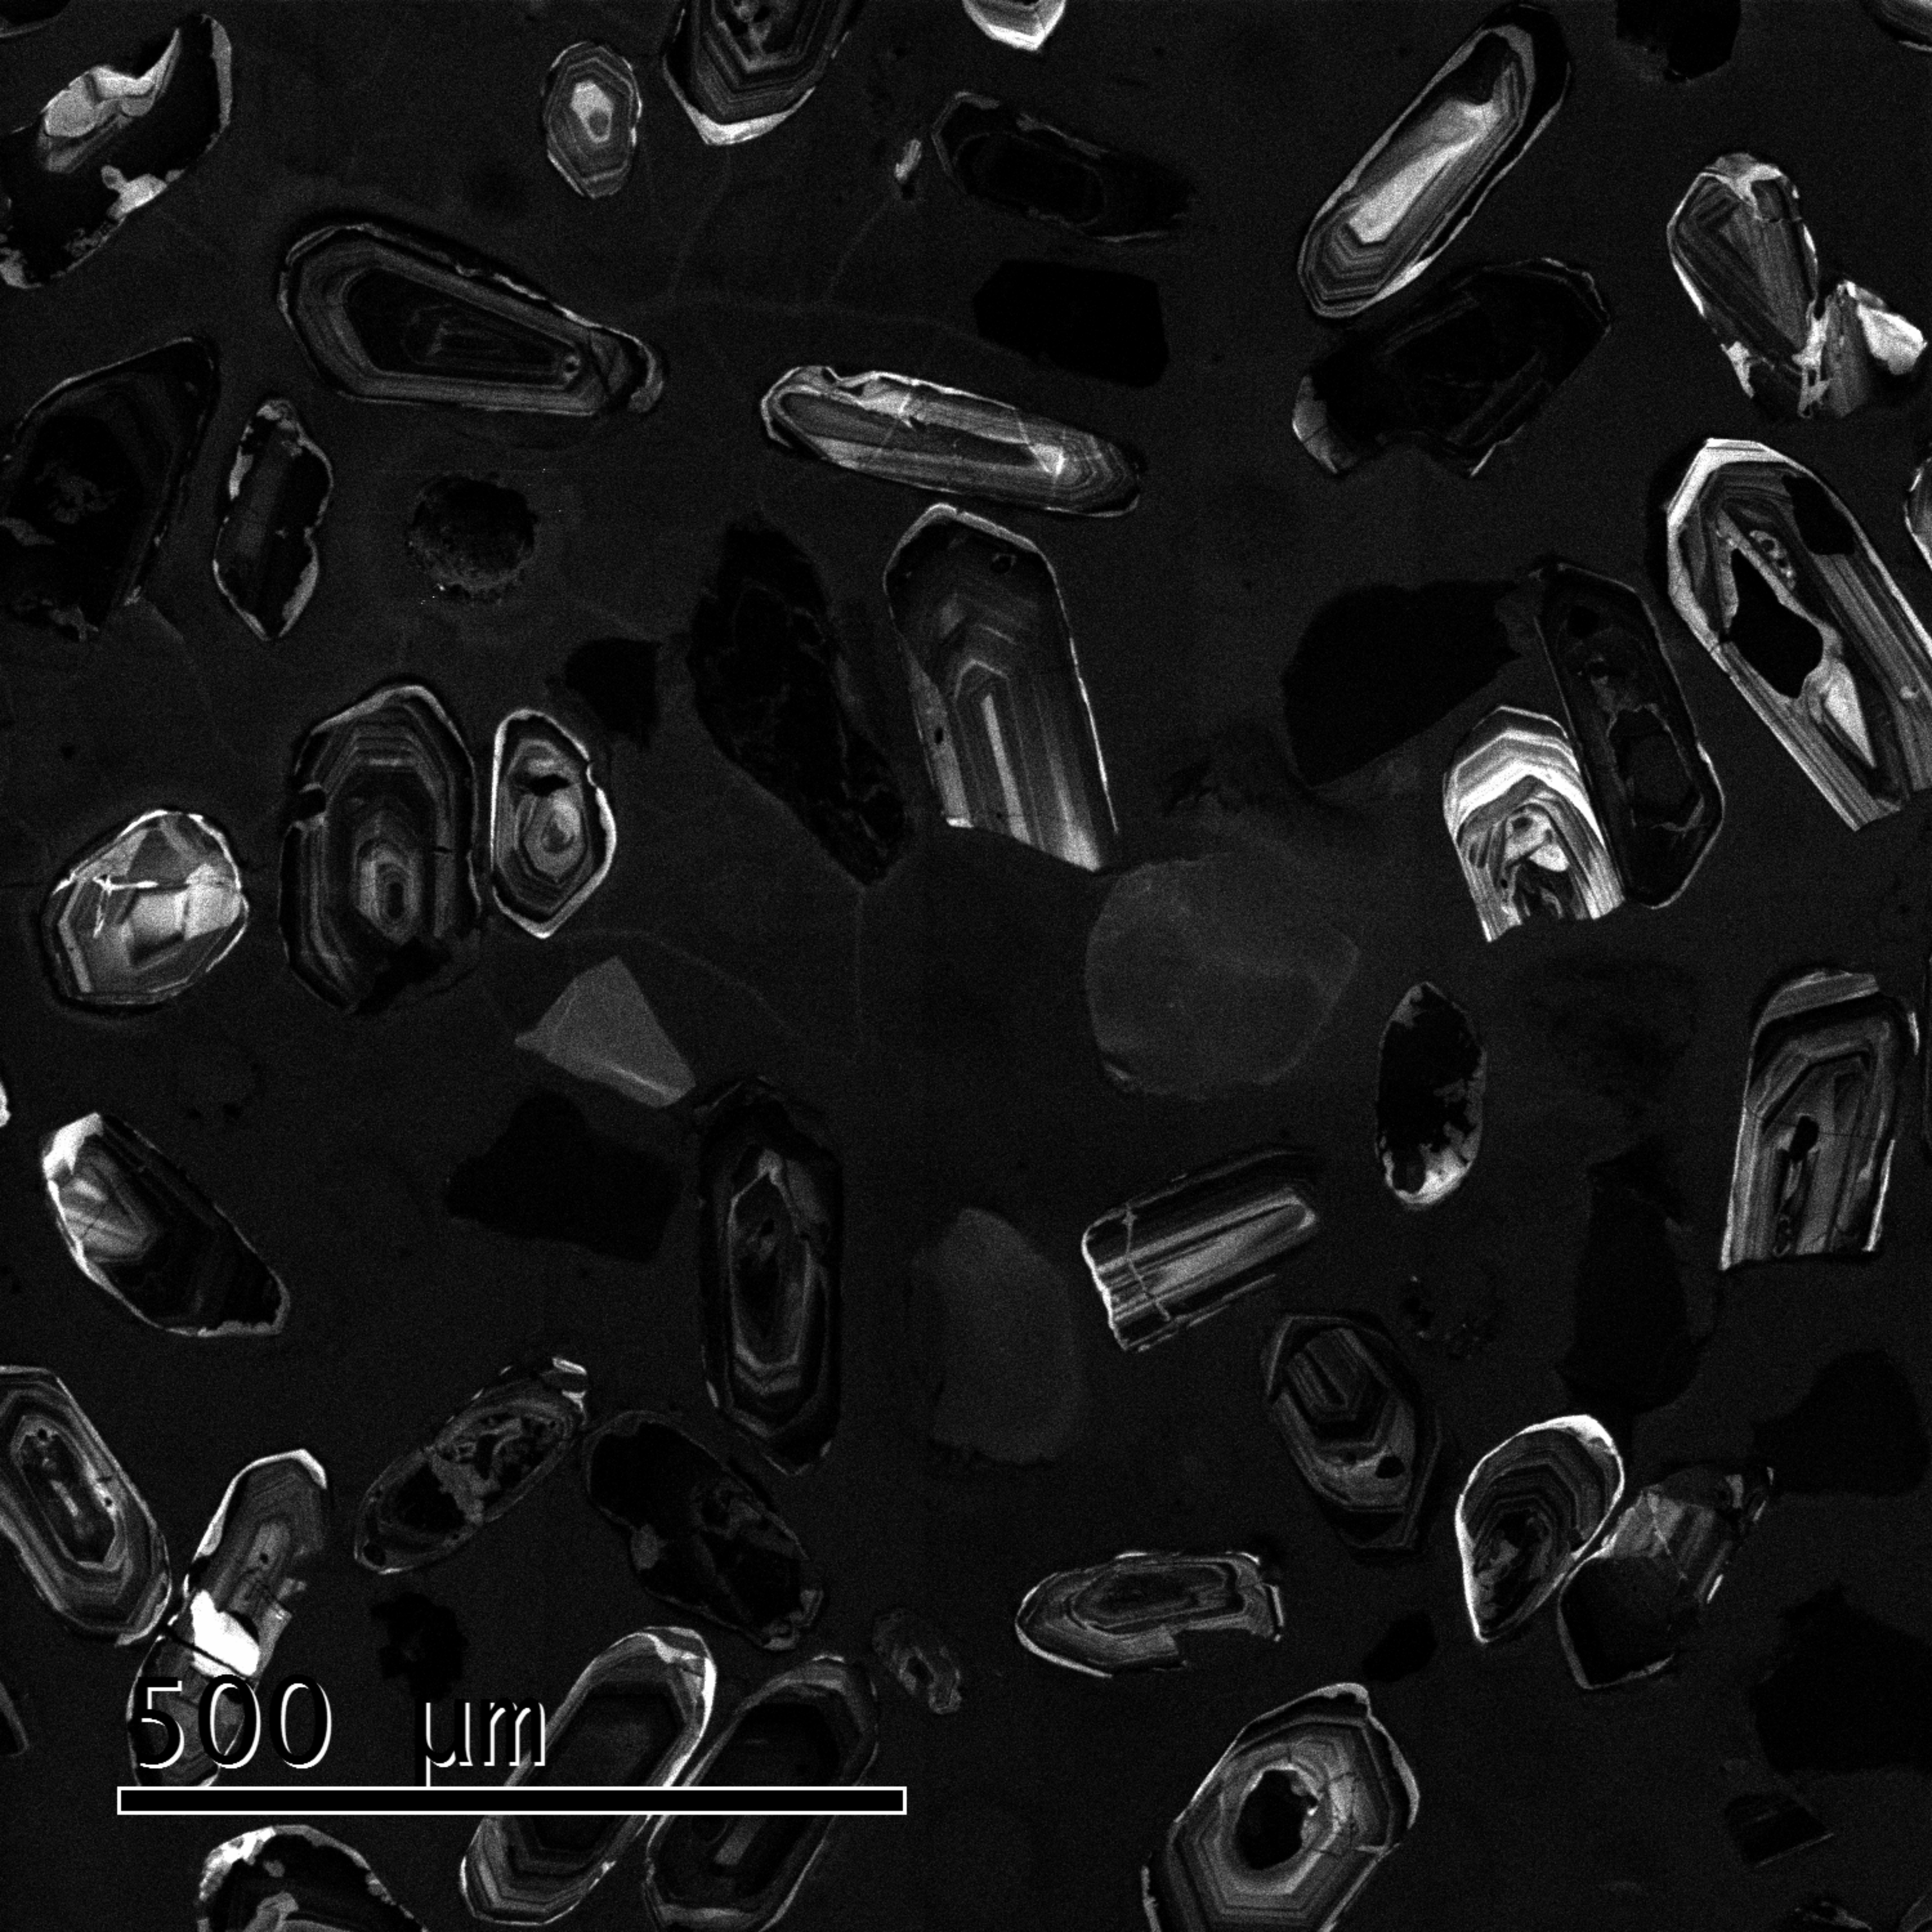

500  $\mu\text{m}$

Supplement: MOESM24 [file 531_2021_2103_MOESM24_ESM.pdf]

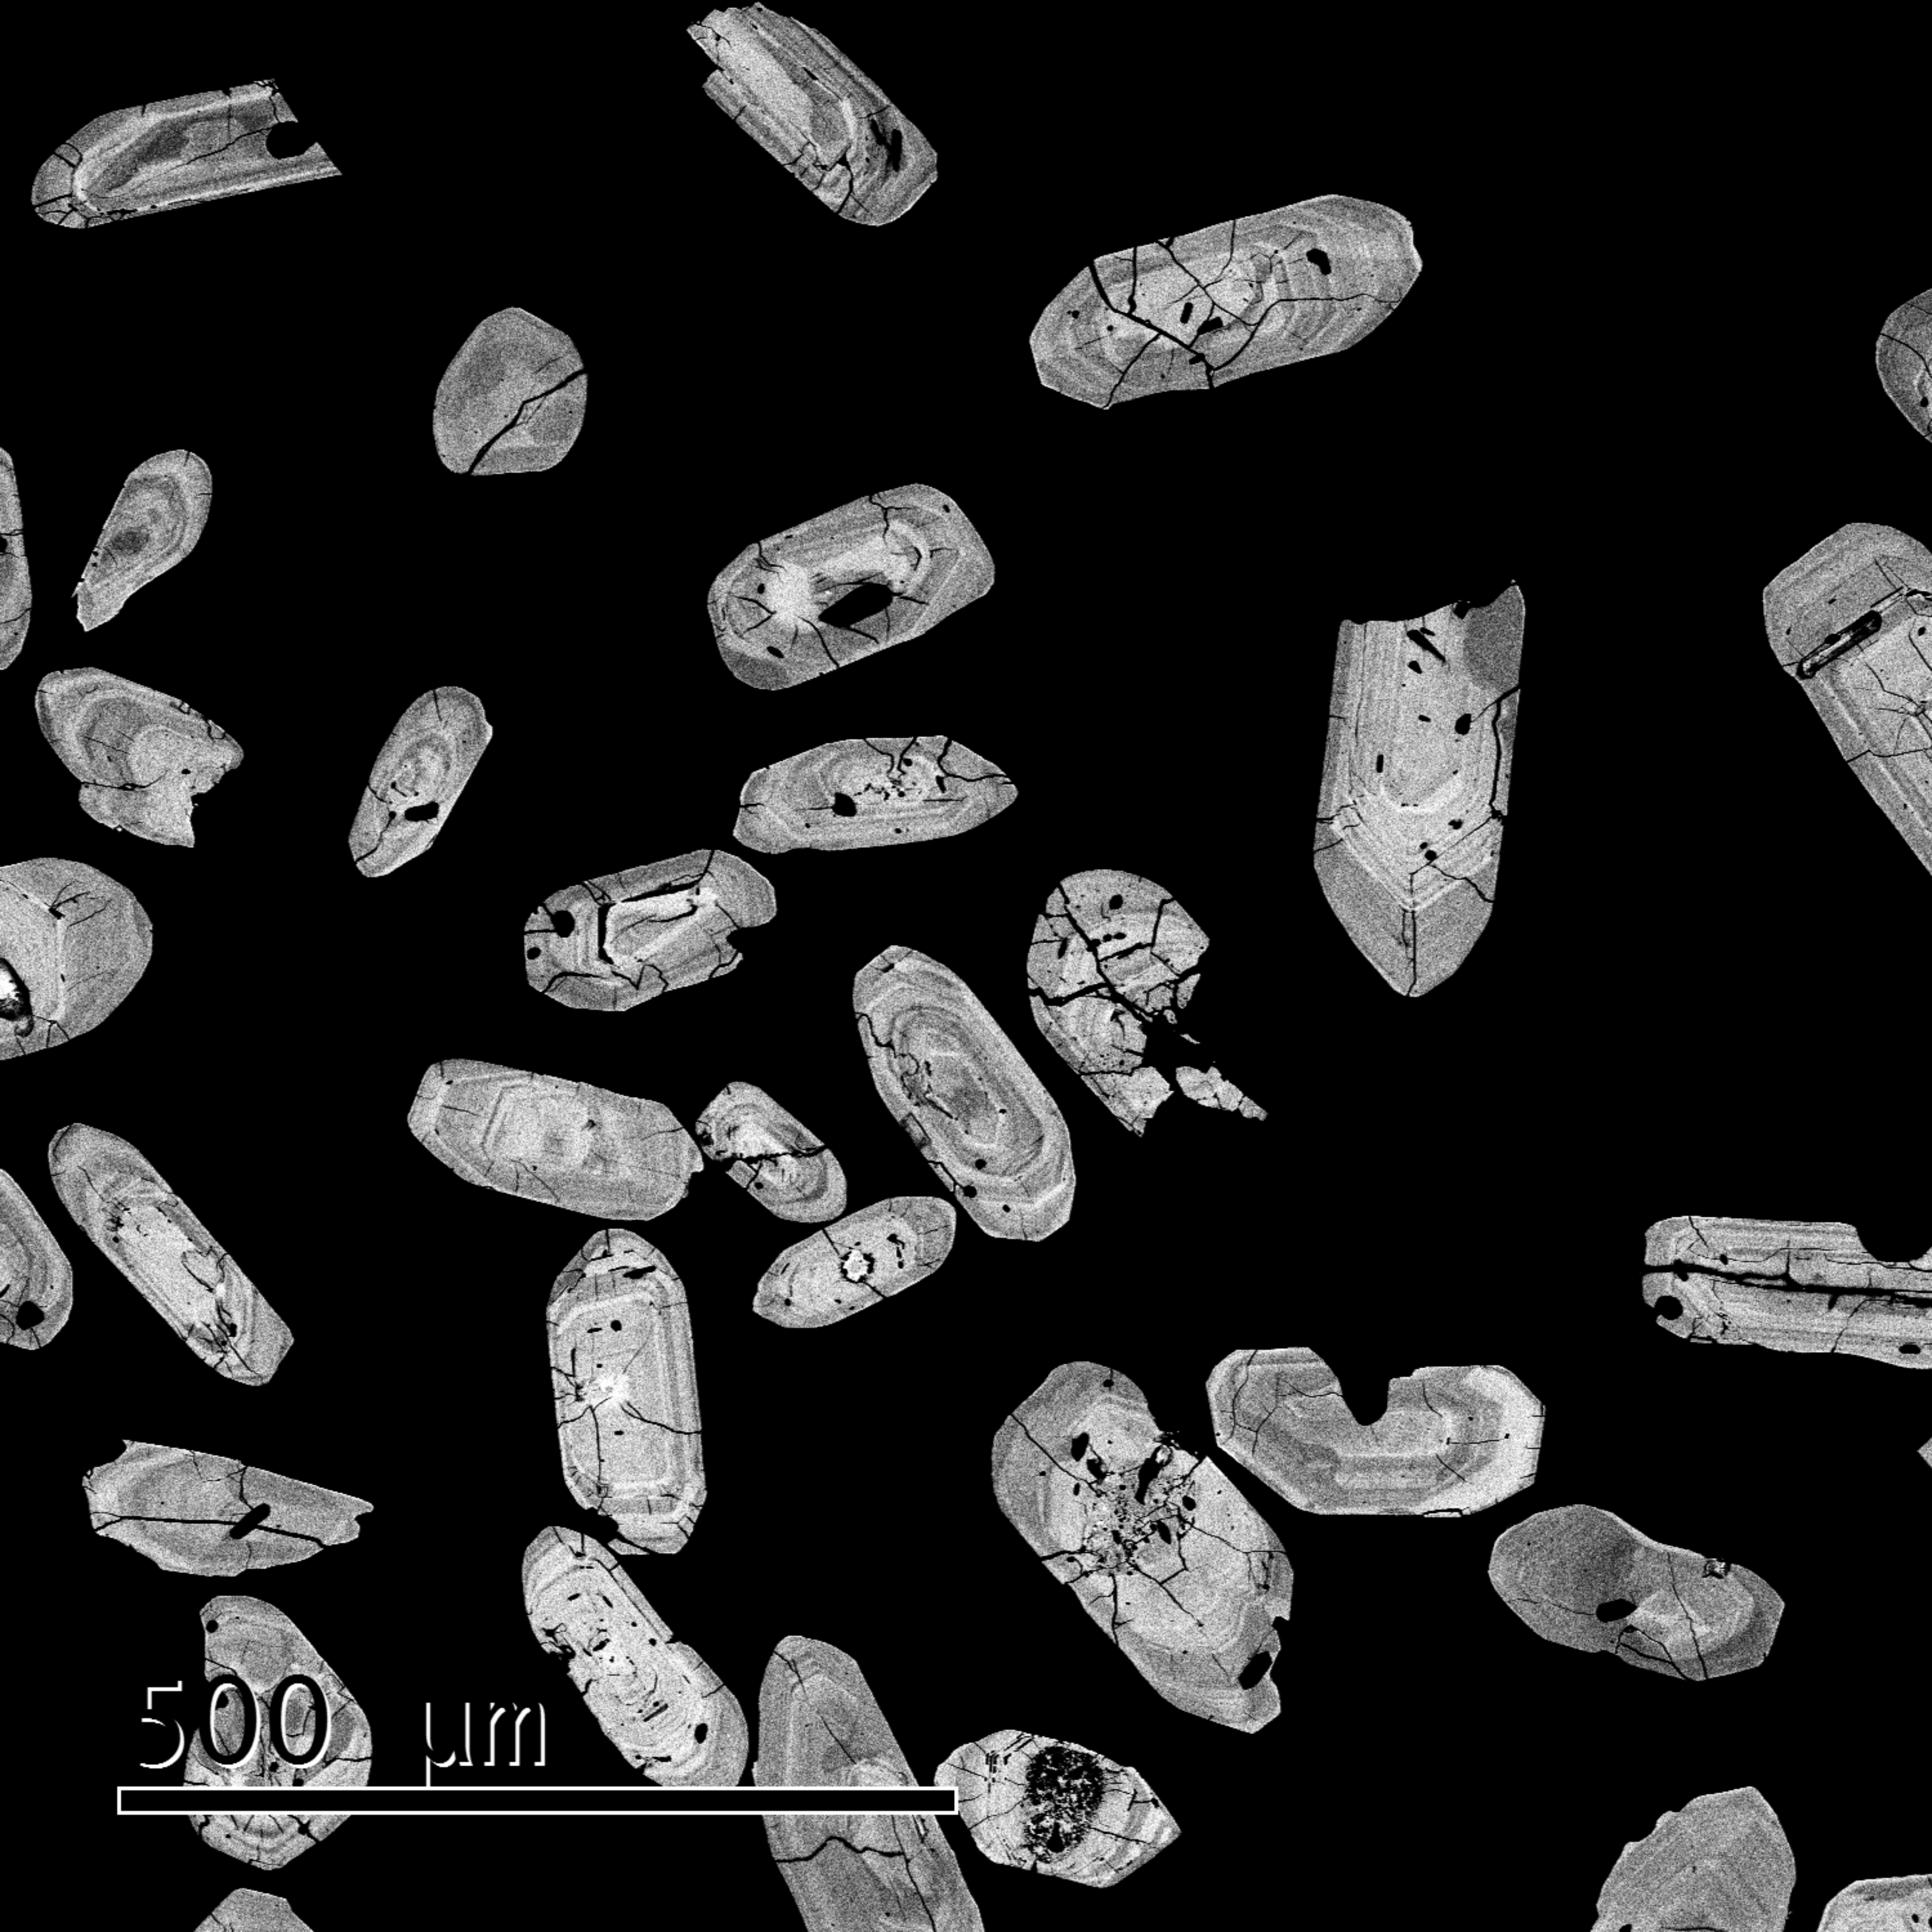

500  $\mu\text{m}$

Supplement: MOESM25 [file 531_2021_2103_MOESM25_ESM.pdf]

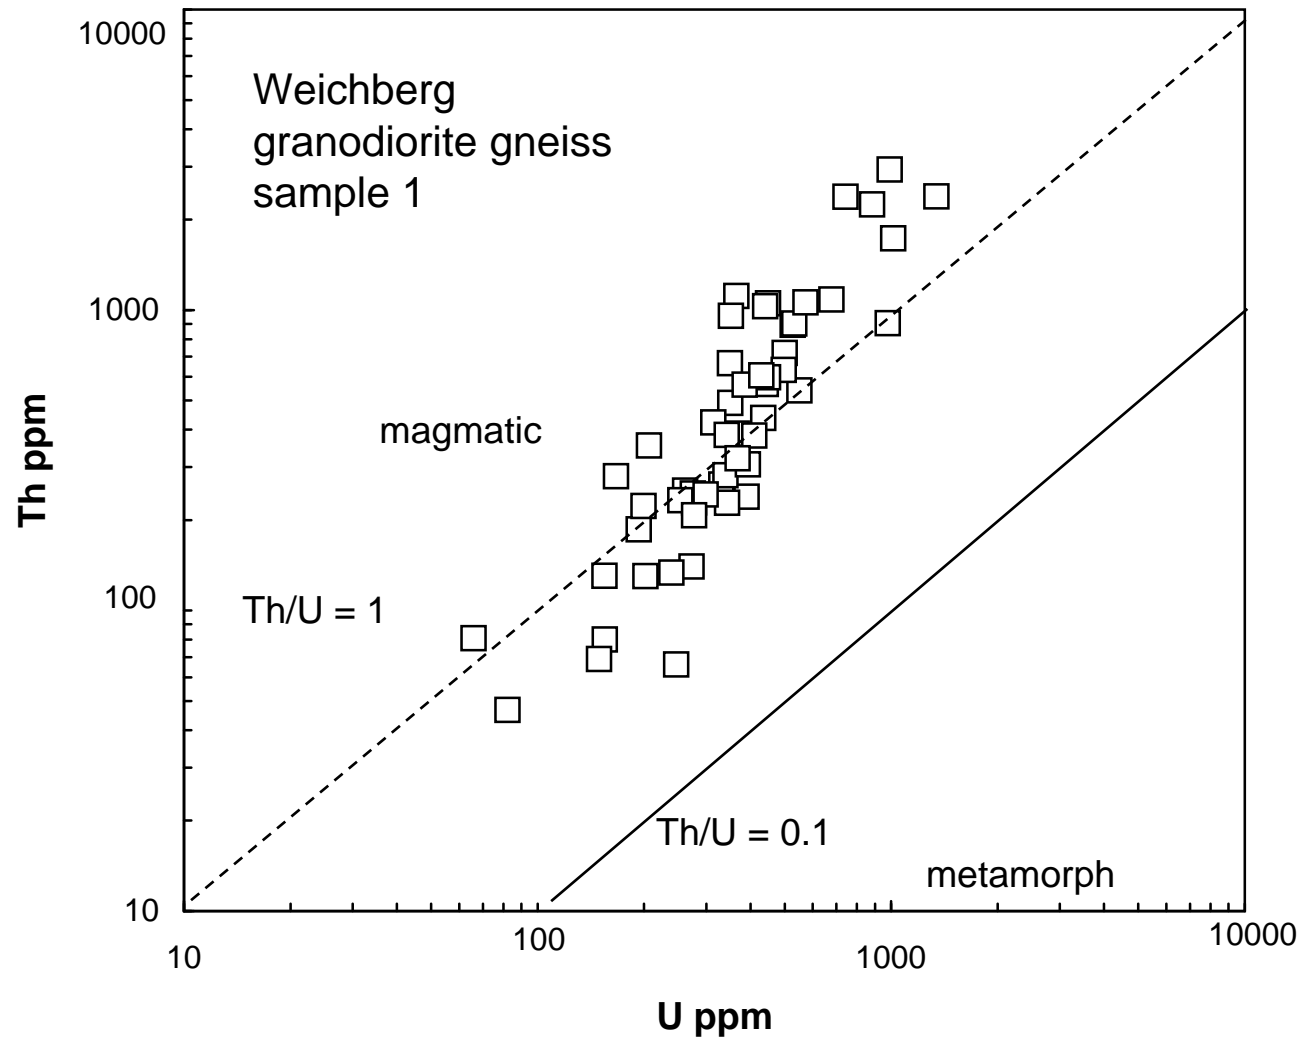

Supplement: MOESM12 [file 531_2021_2103_MOESM12_ESM.pdf]

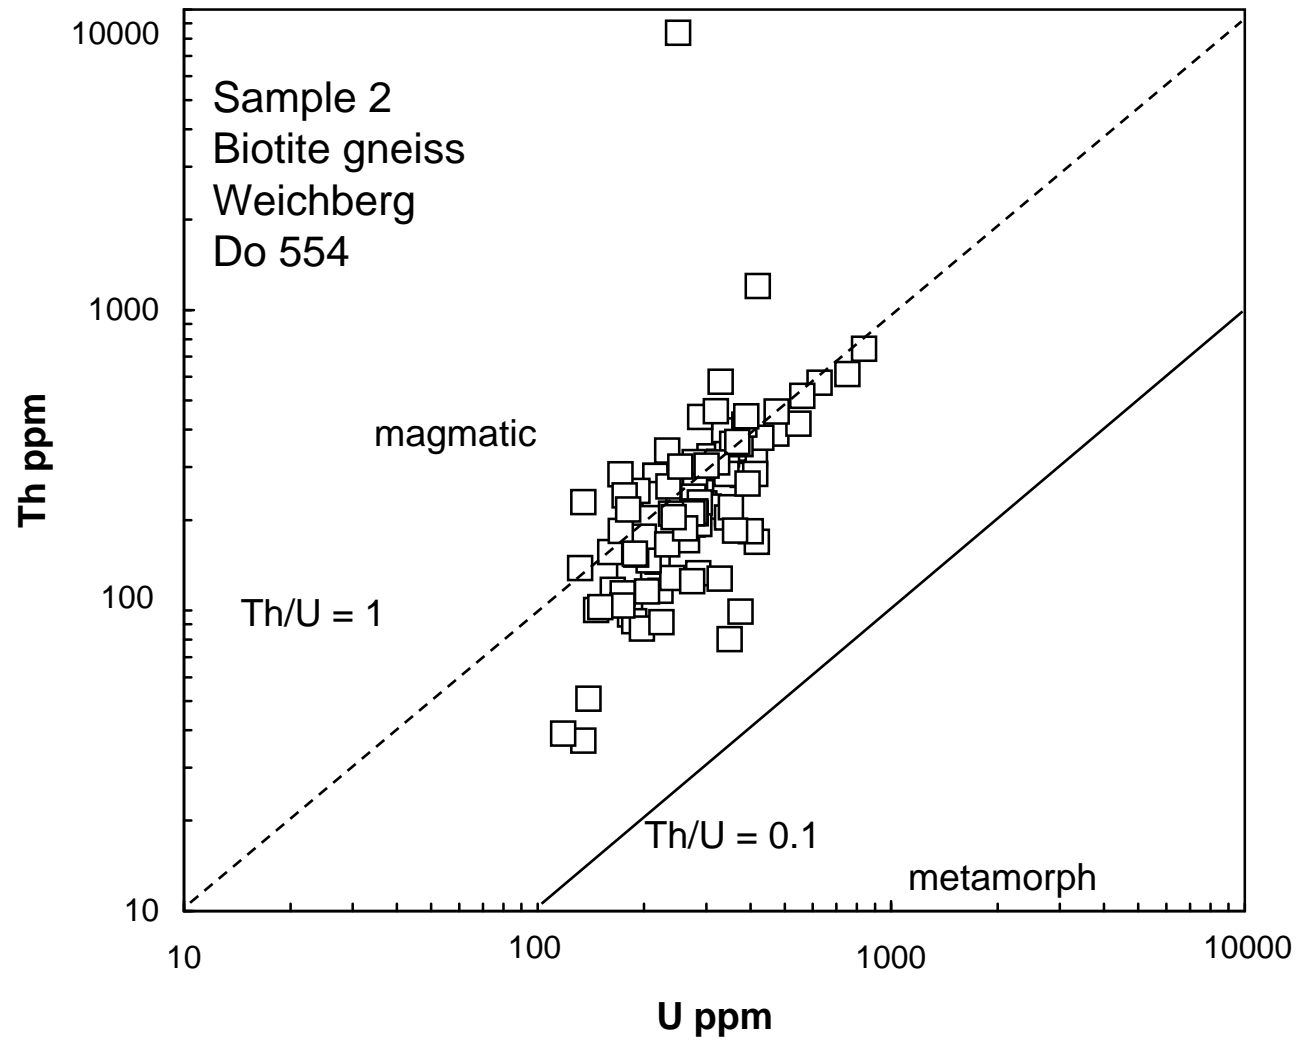

Supplement: MOESM13 [file 531_2021_2103_MOESM13_ESM.pdf]

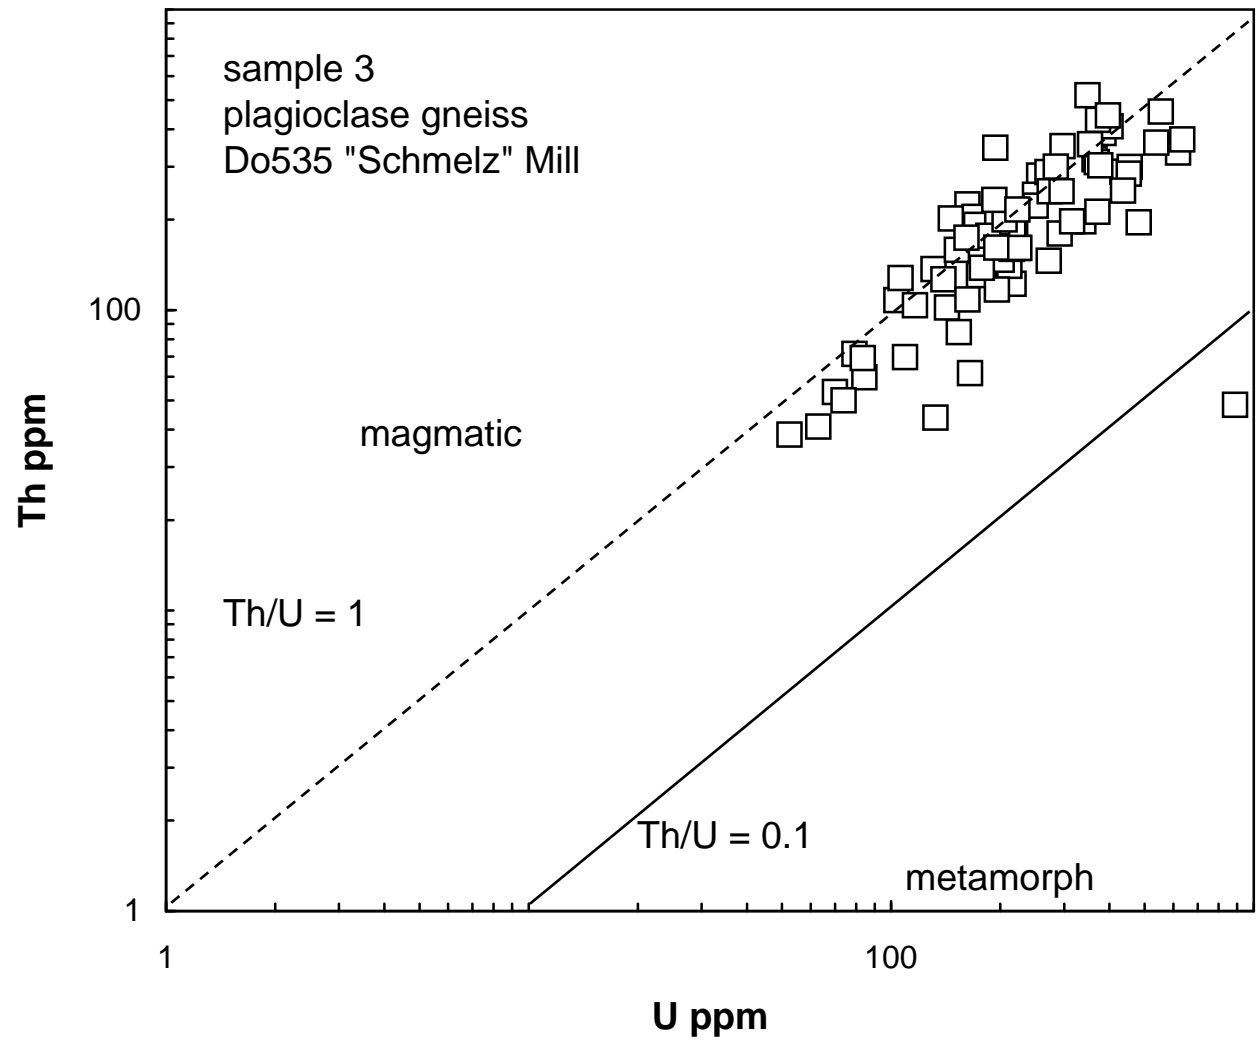

Supplement: MOESM14 [file 531_2021_2103_MOESM14_ESM.pdf]

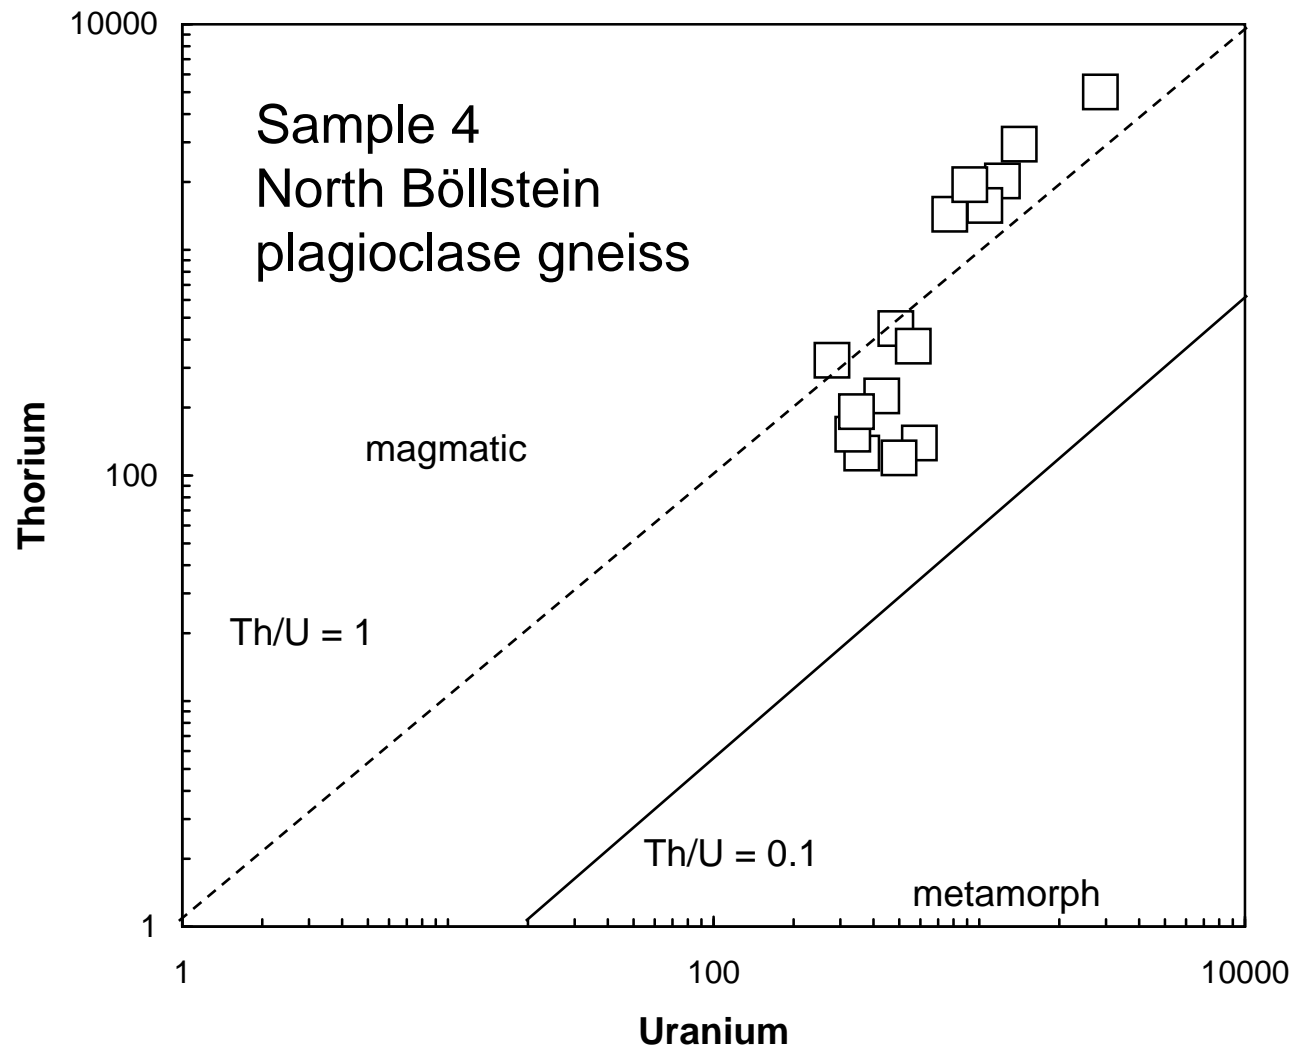

Supplement: MOESM15 [file 531_2021_2103_MOESM15_ESM.pdf]

c)

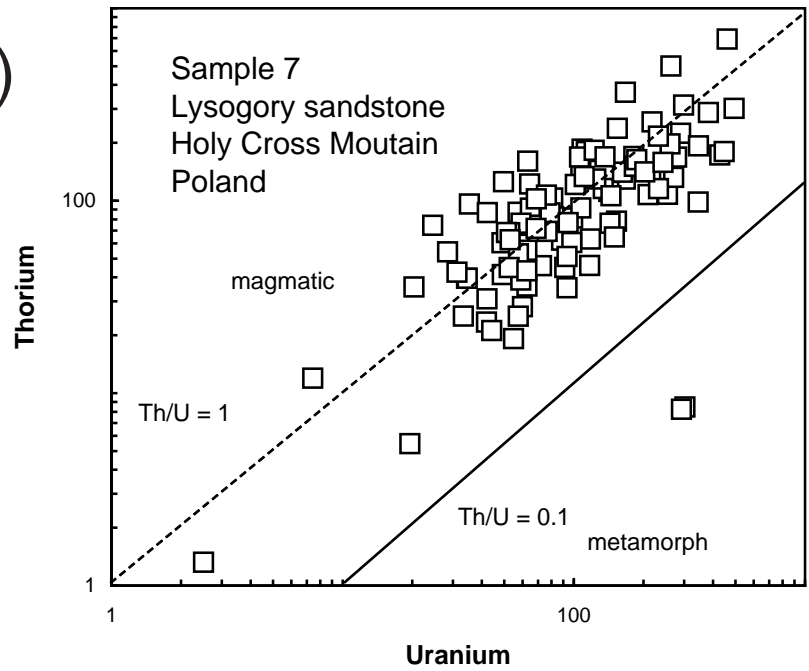

b)

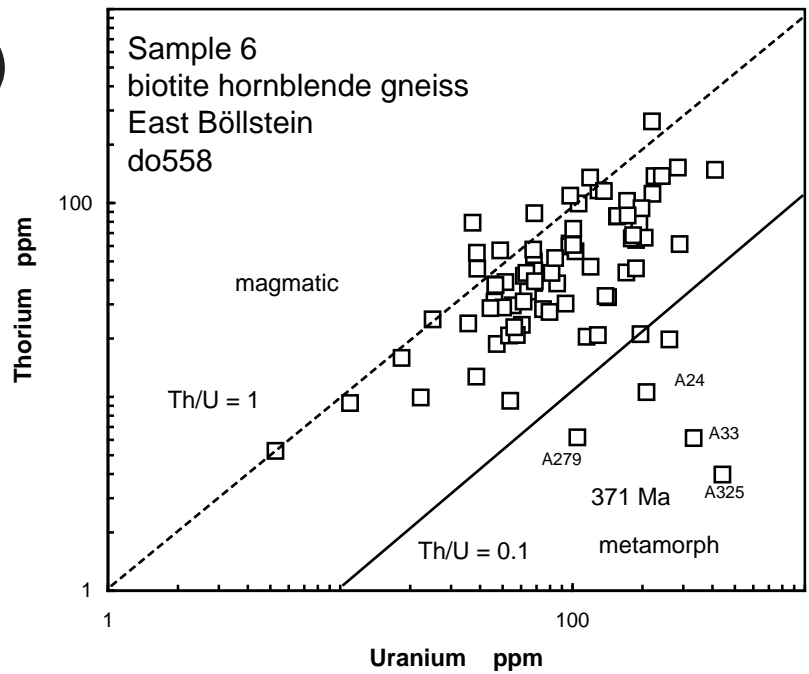

a)

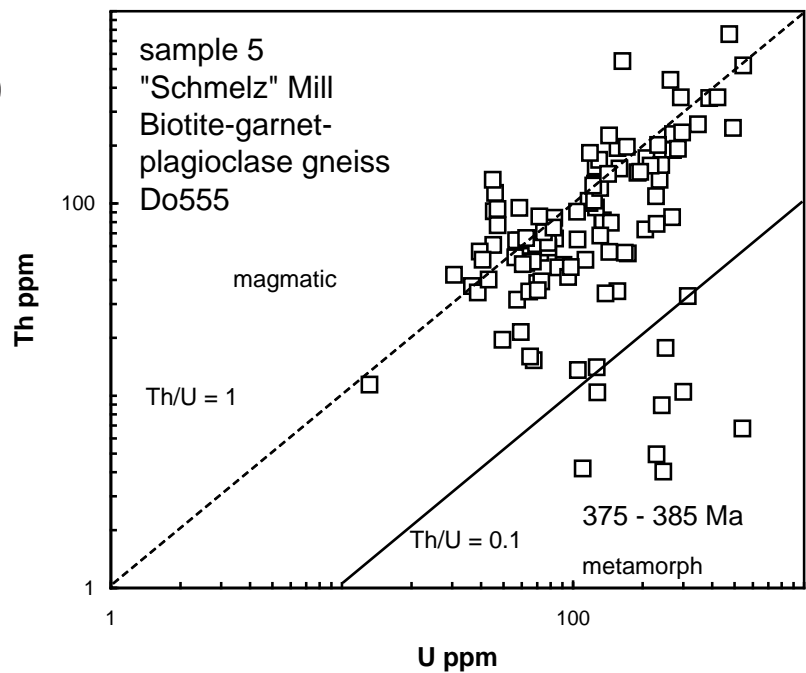

Supplement: MOESM16 [file 531_2021_2103_MOESM16_ESM.pdf]

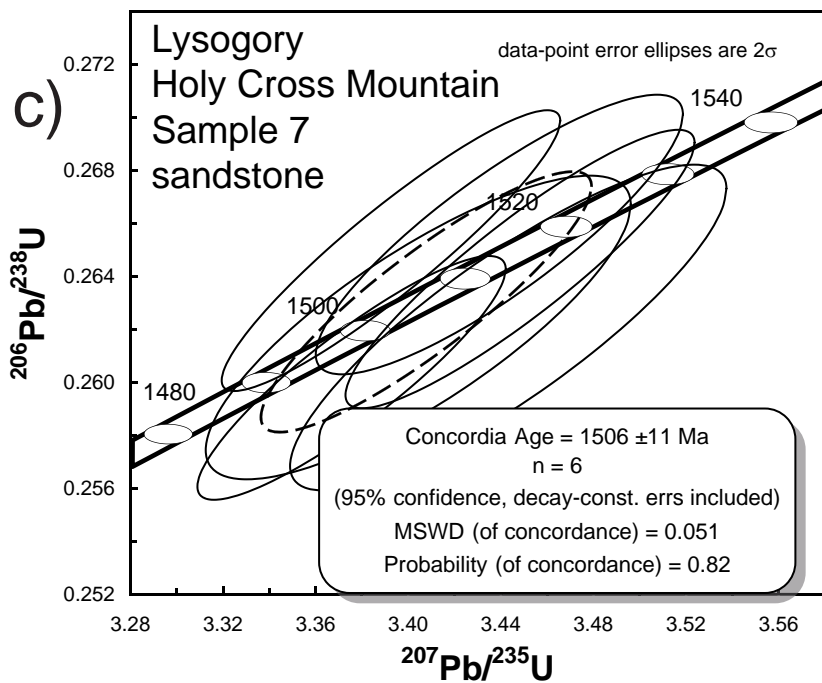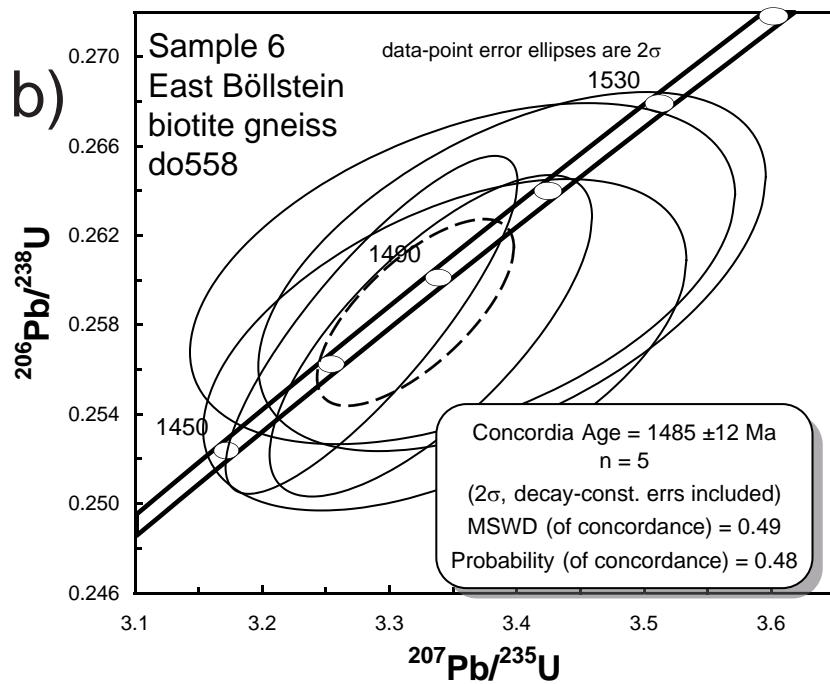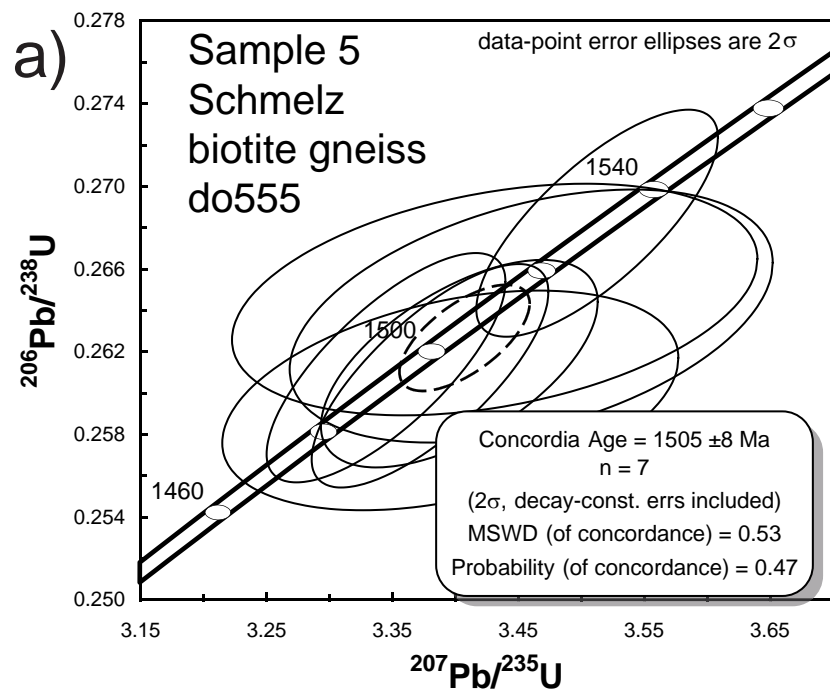

Supplement: MOESM17 [file 531_2021_2103_MOESM17_ESM.pdf]

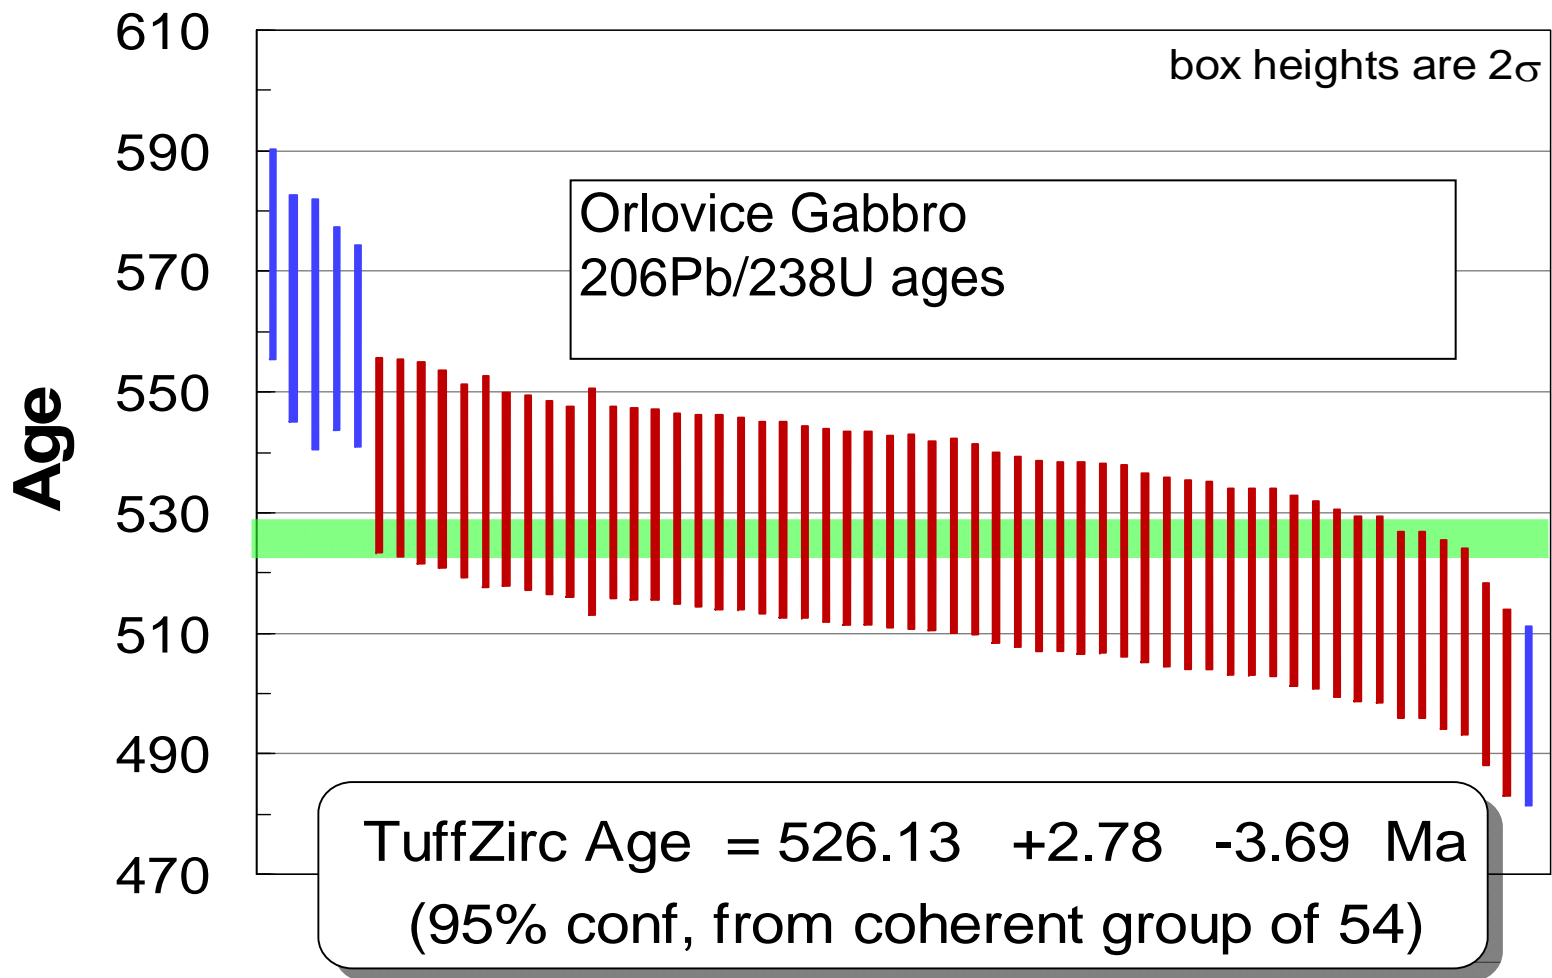

Supplement: MOESM19 [file 531_2021_2103_MOESM19_ESM.pdf]

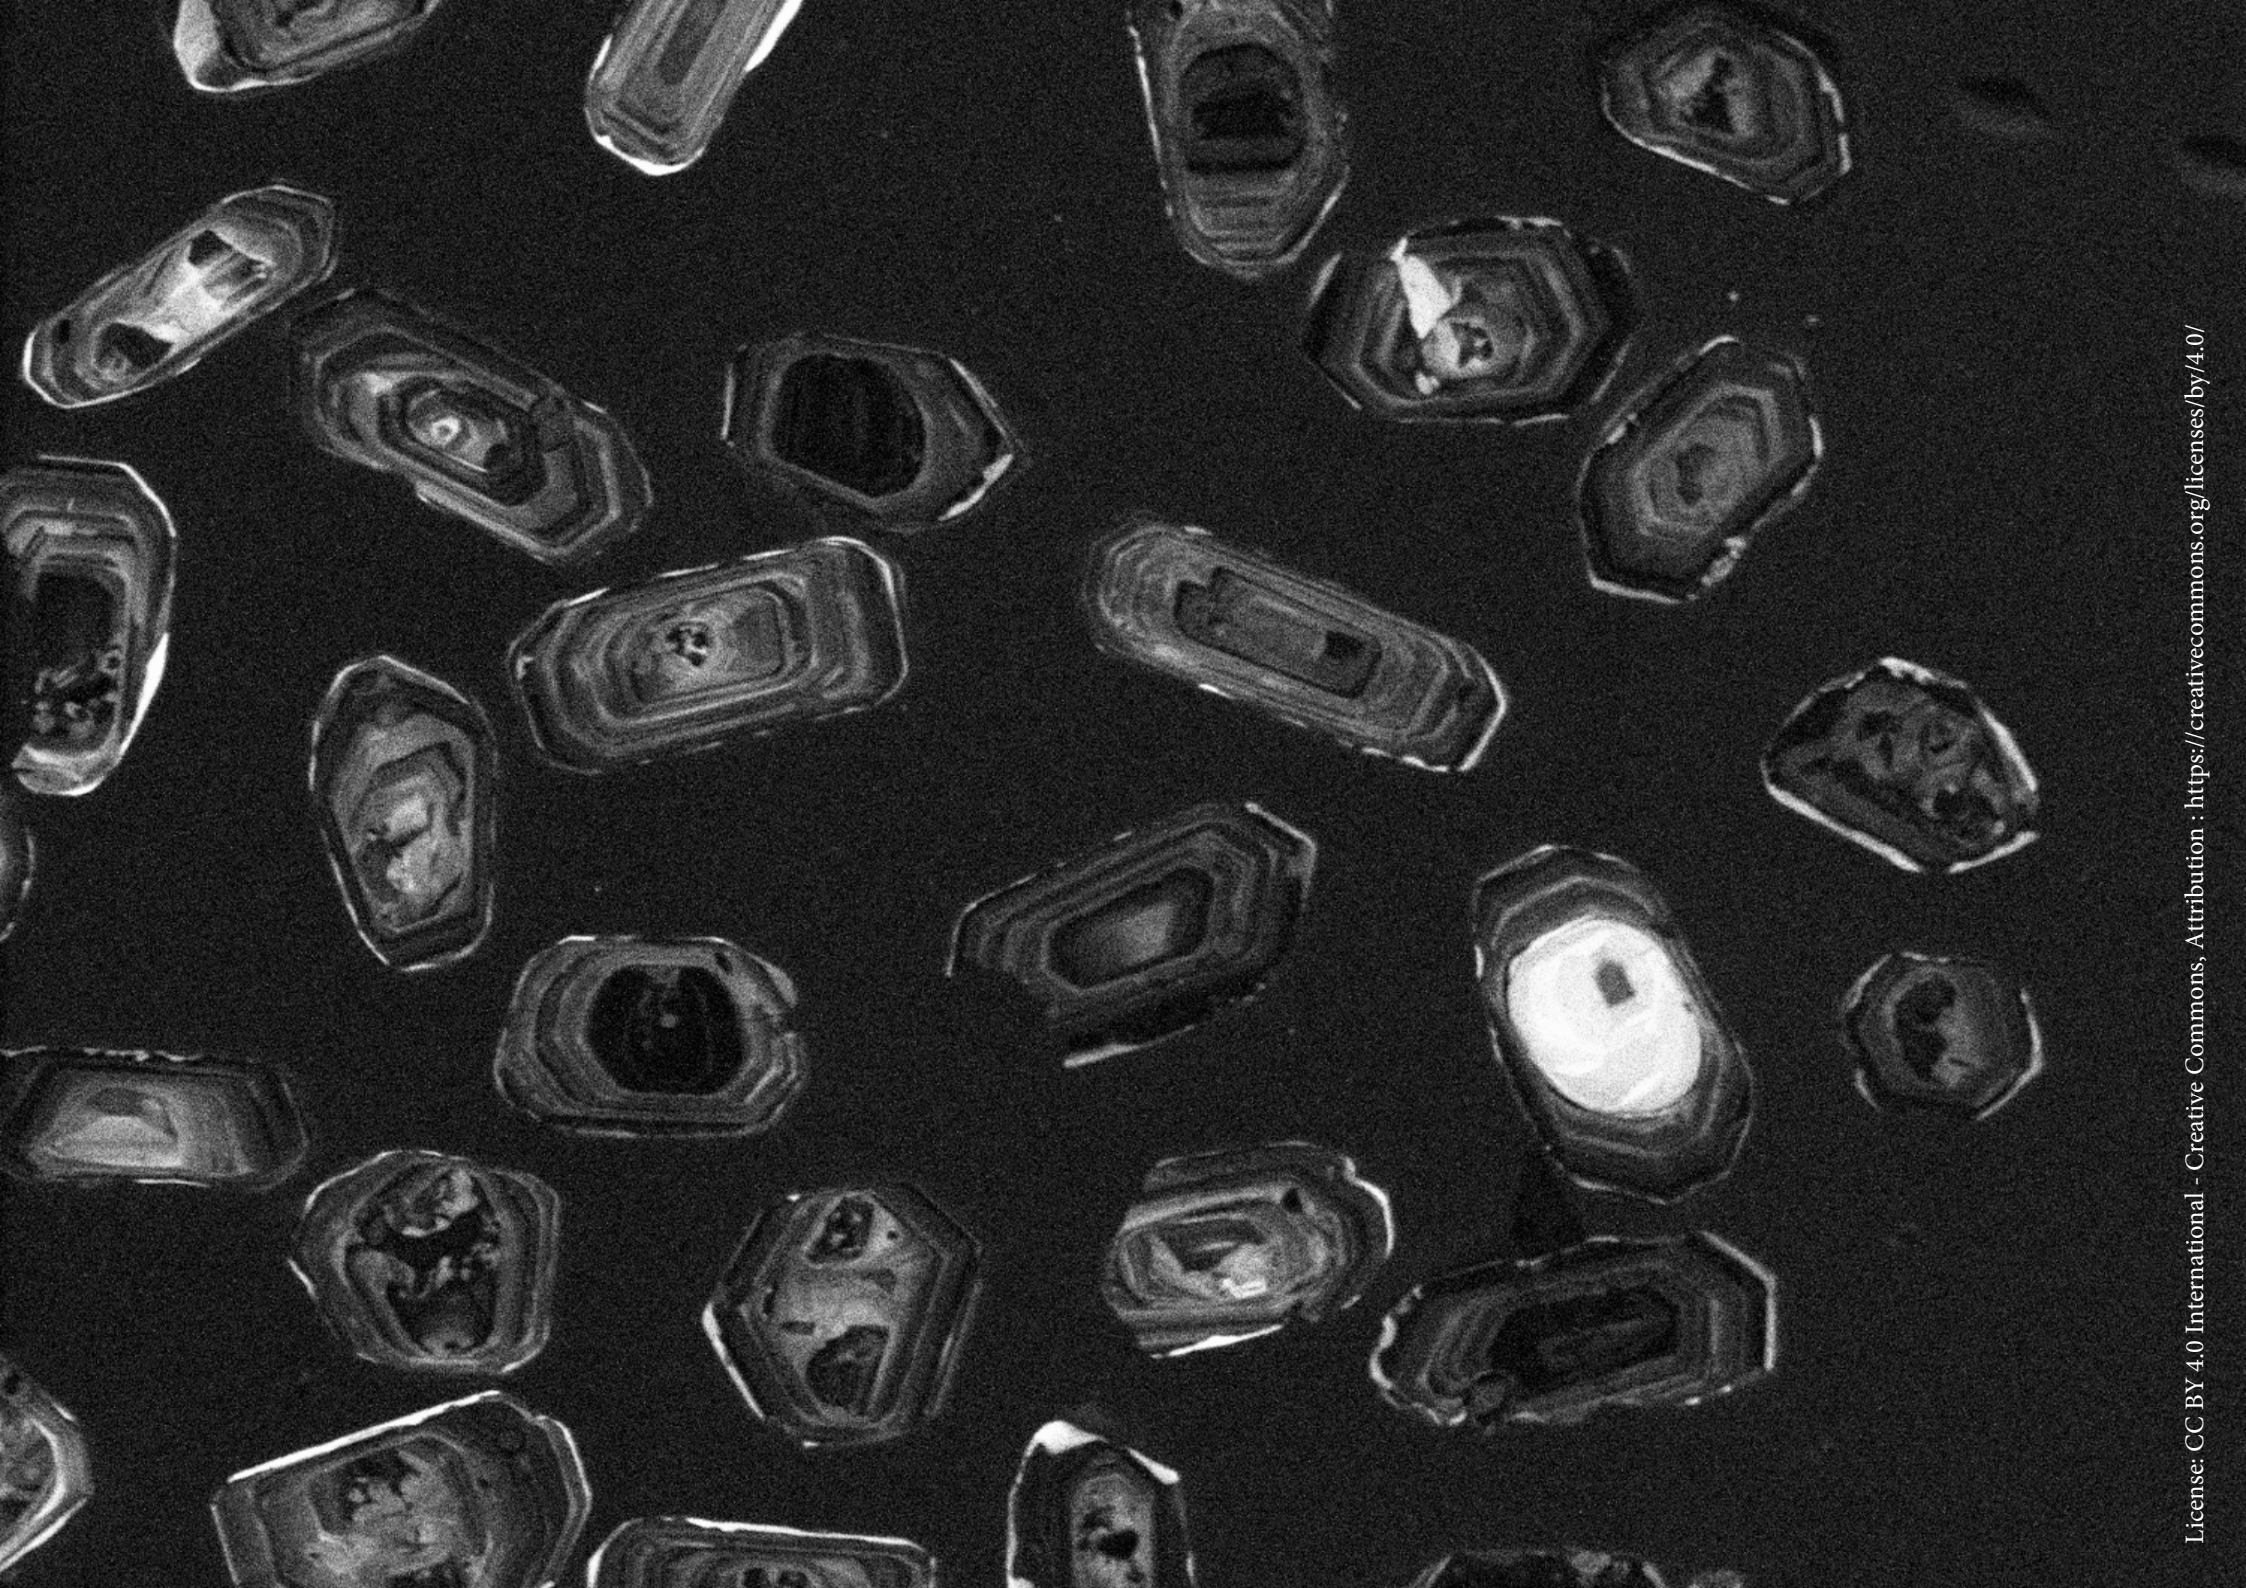

Supplement: MOESM20 [file 531_2021_2103_MOESM20_ESM.pdf]



500  $\mu\text{m}$

Supplement: MOESM21 [file 531_2021_2103_MOESM21_ESM.pdf]

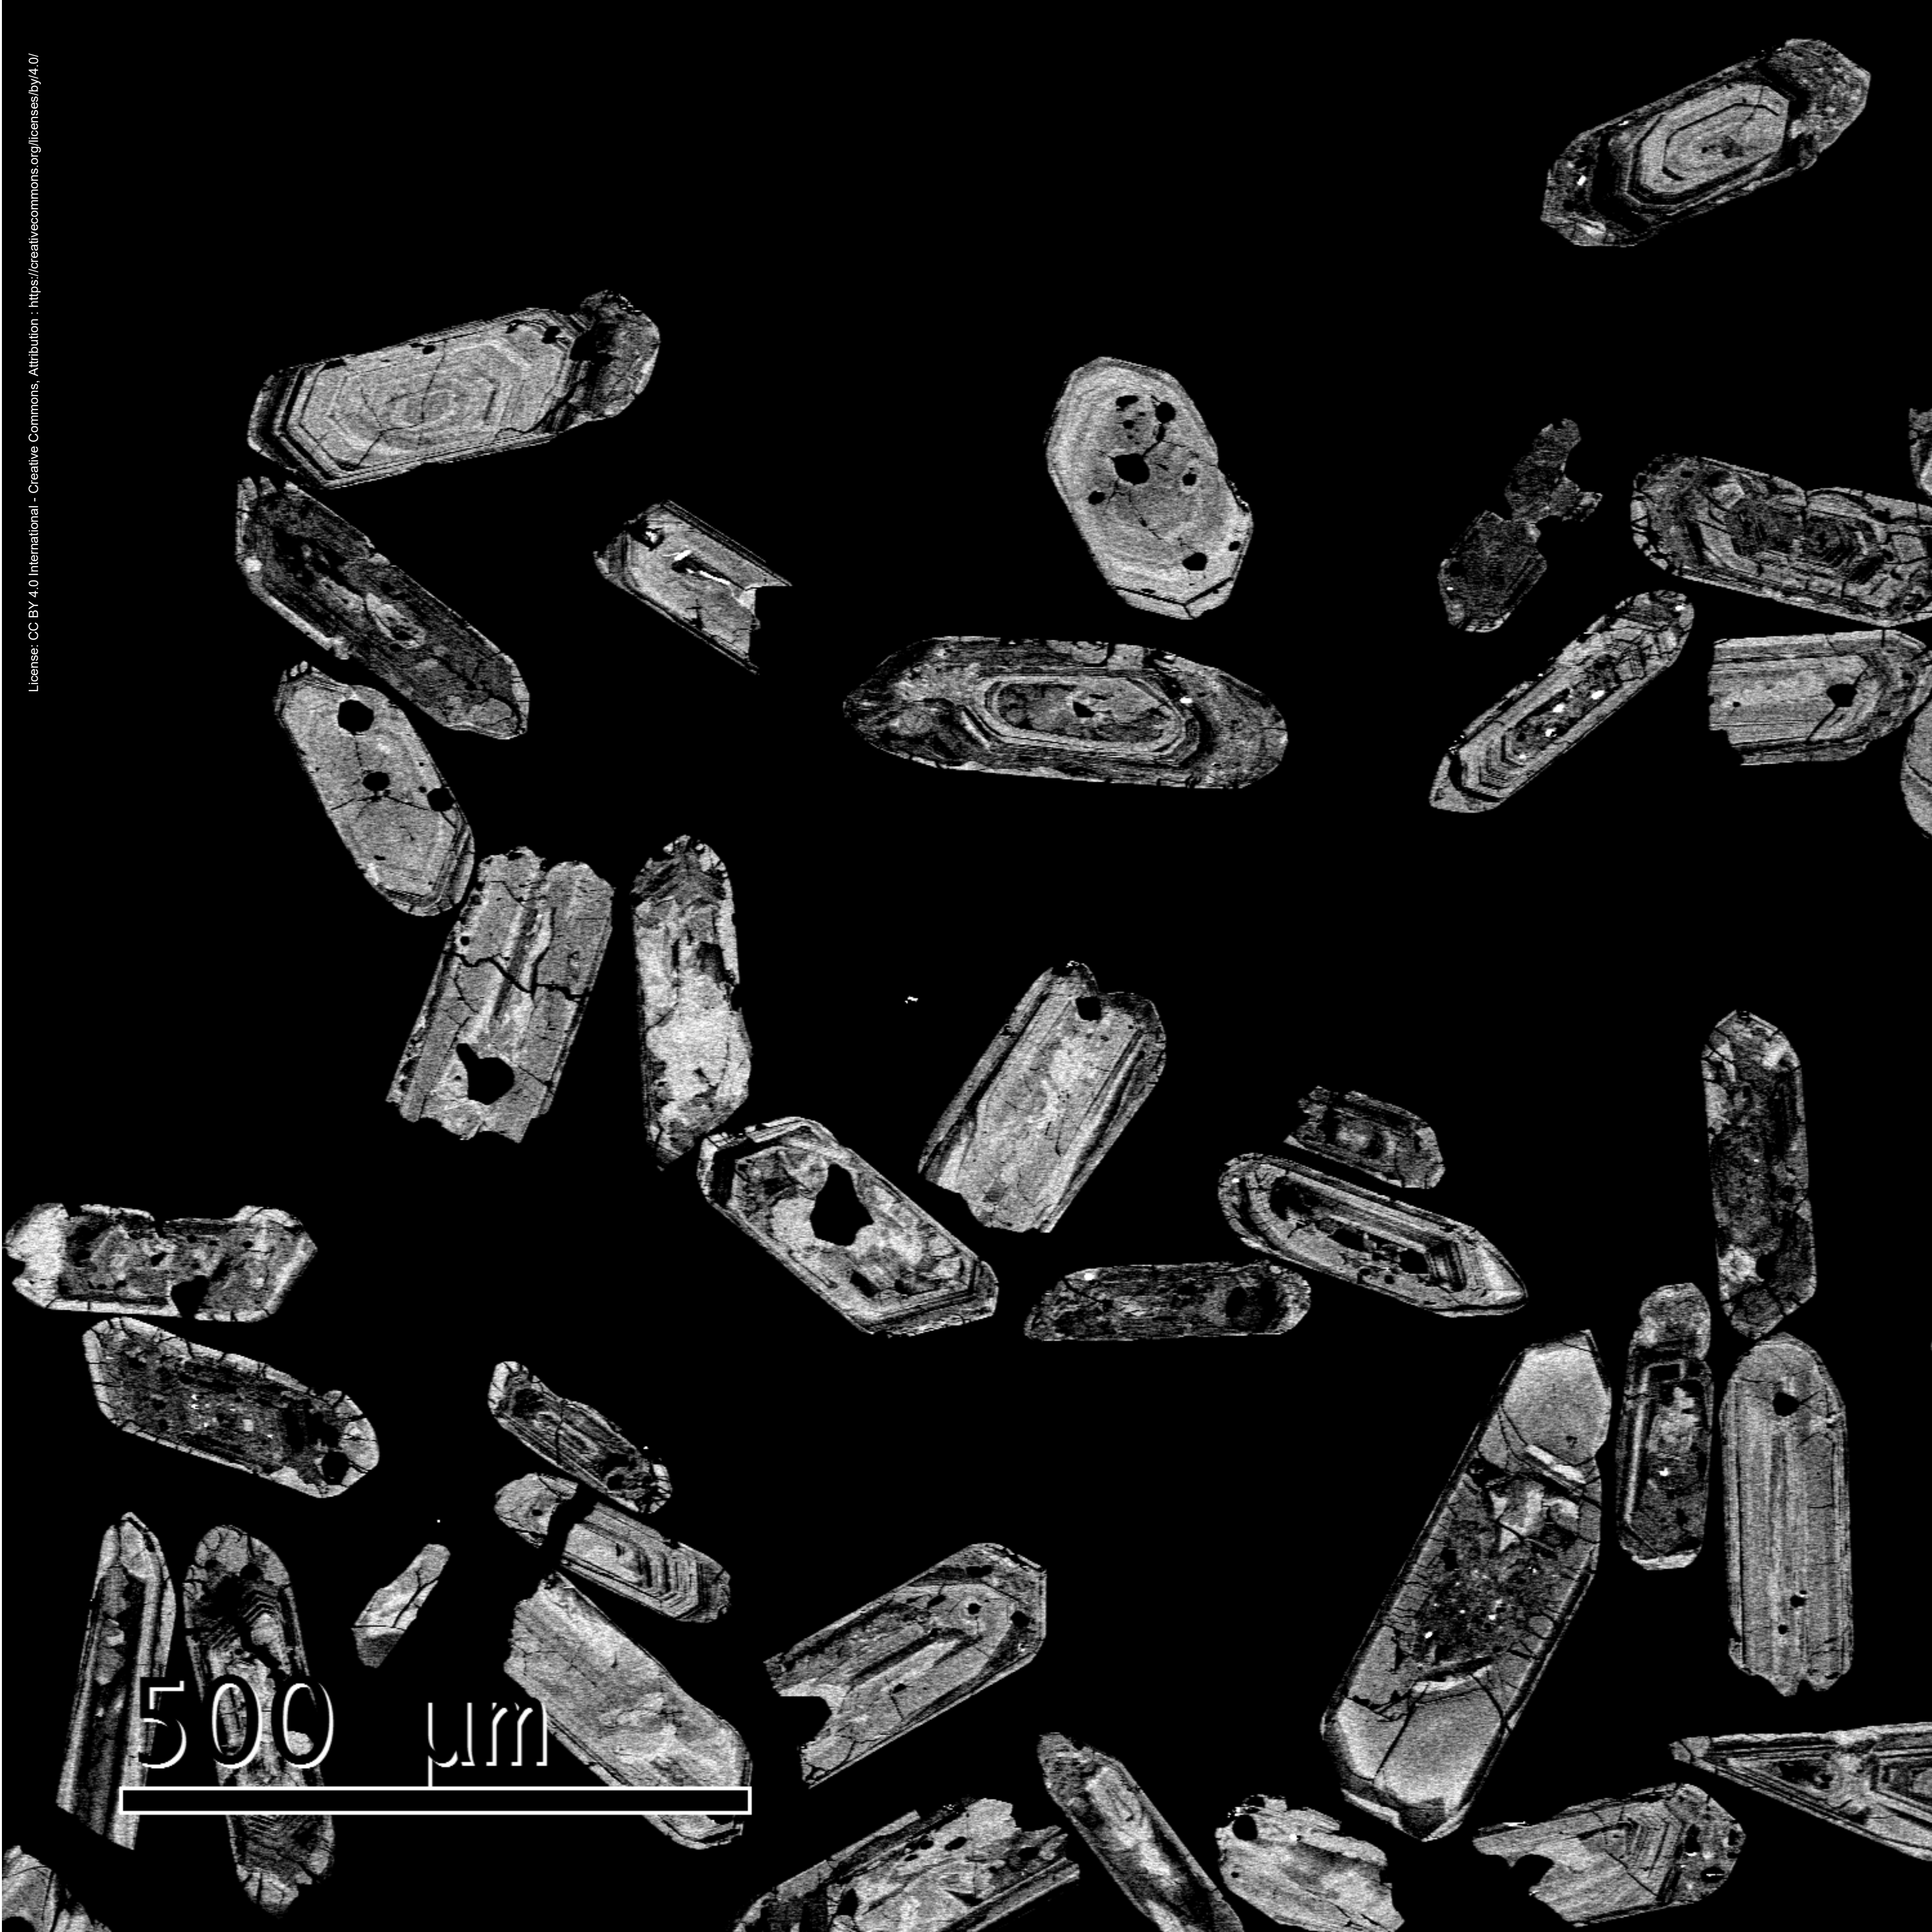

Supplement: MOESM23 [file 531_2021_2103_MOESM23_ESM.pdf]

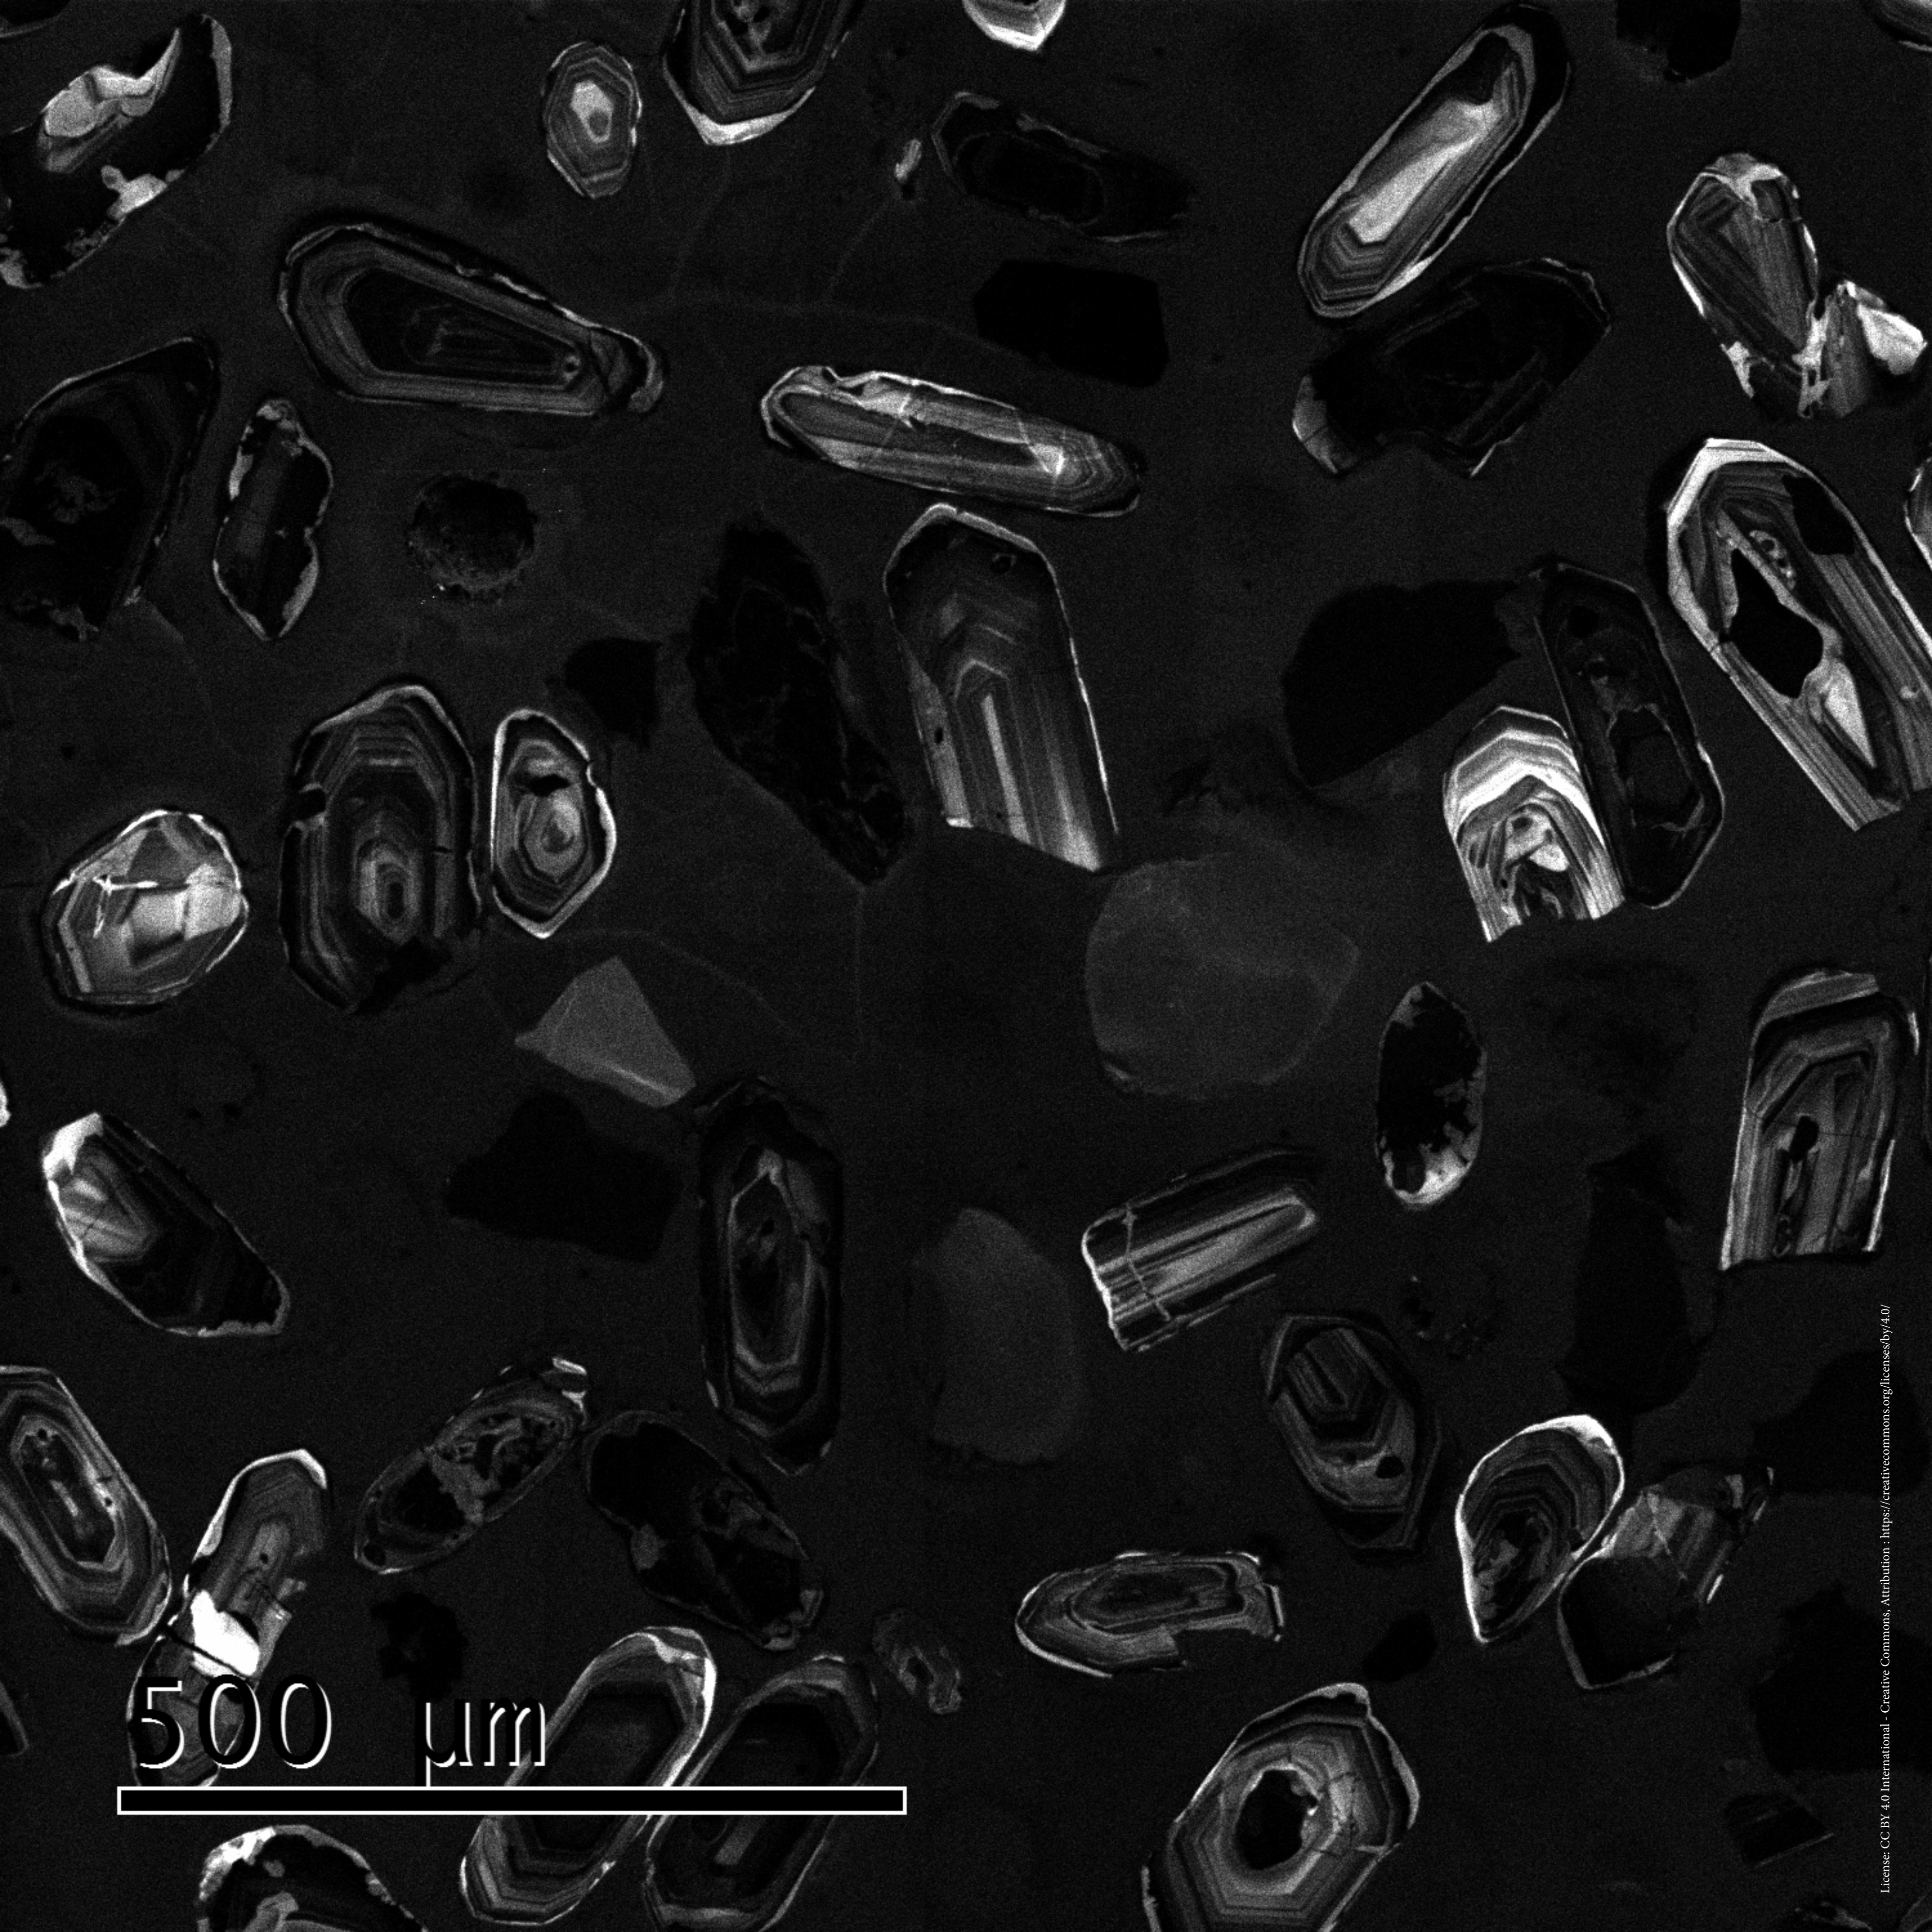

500  $\mu\text{m}$

Supplement: MOESM24 [file 531_2021_2103_MOESM24_ESM.pdf]

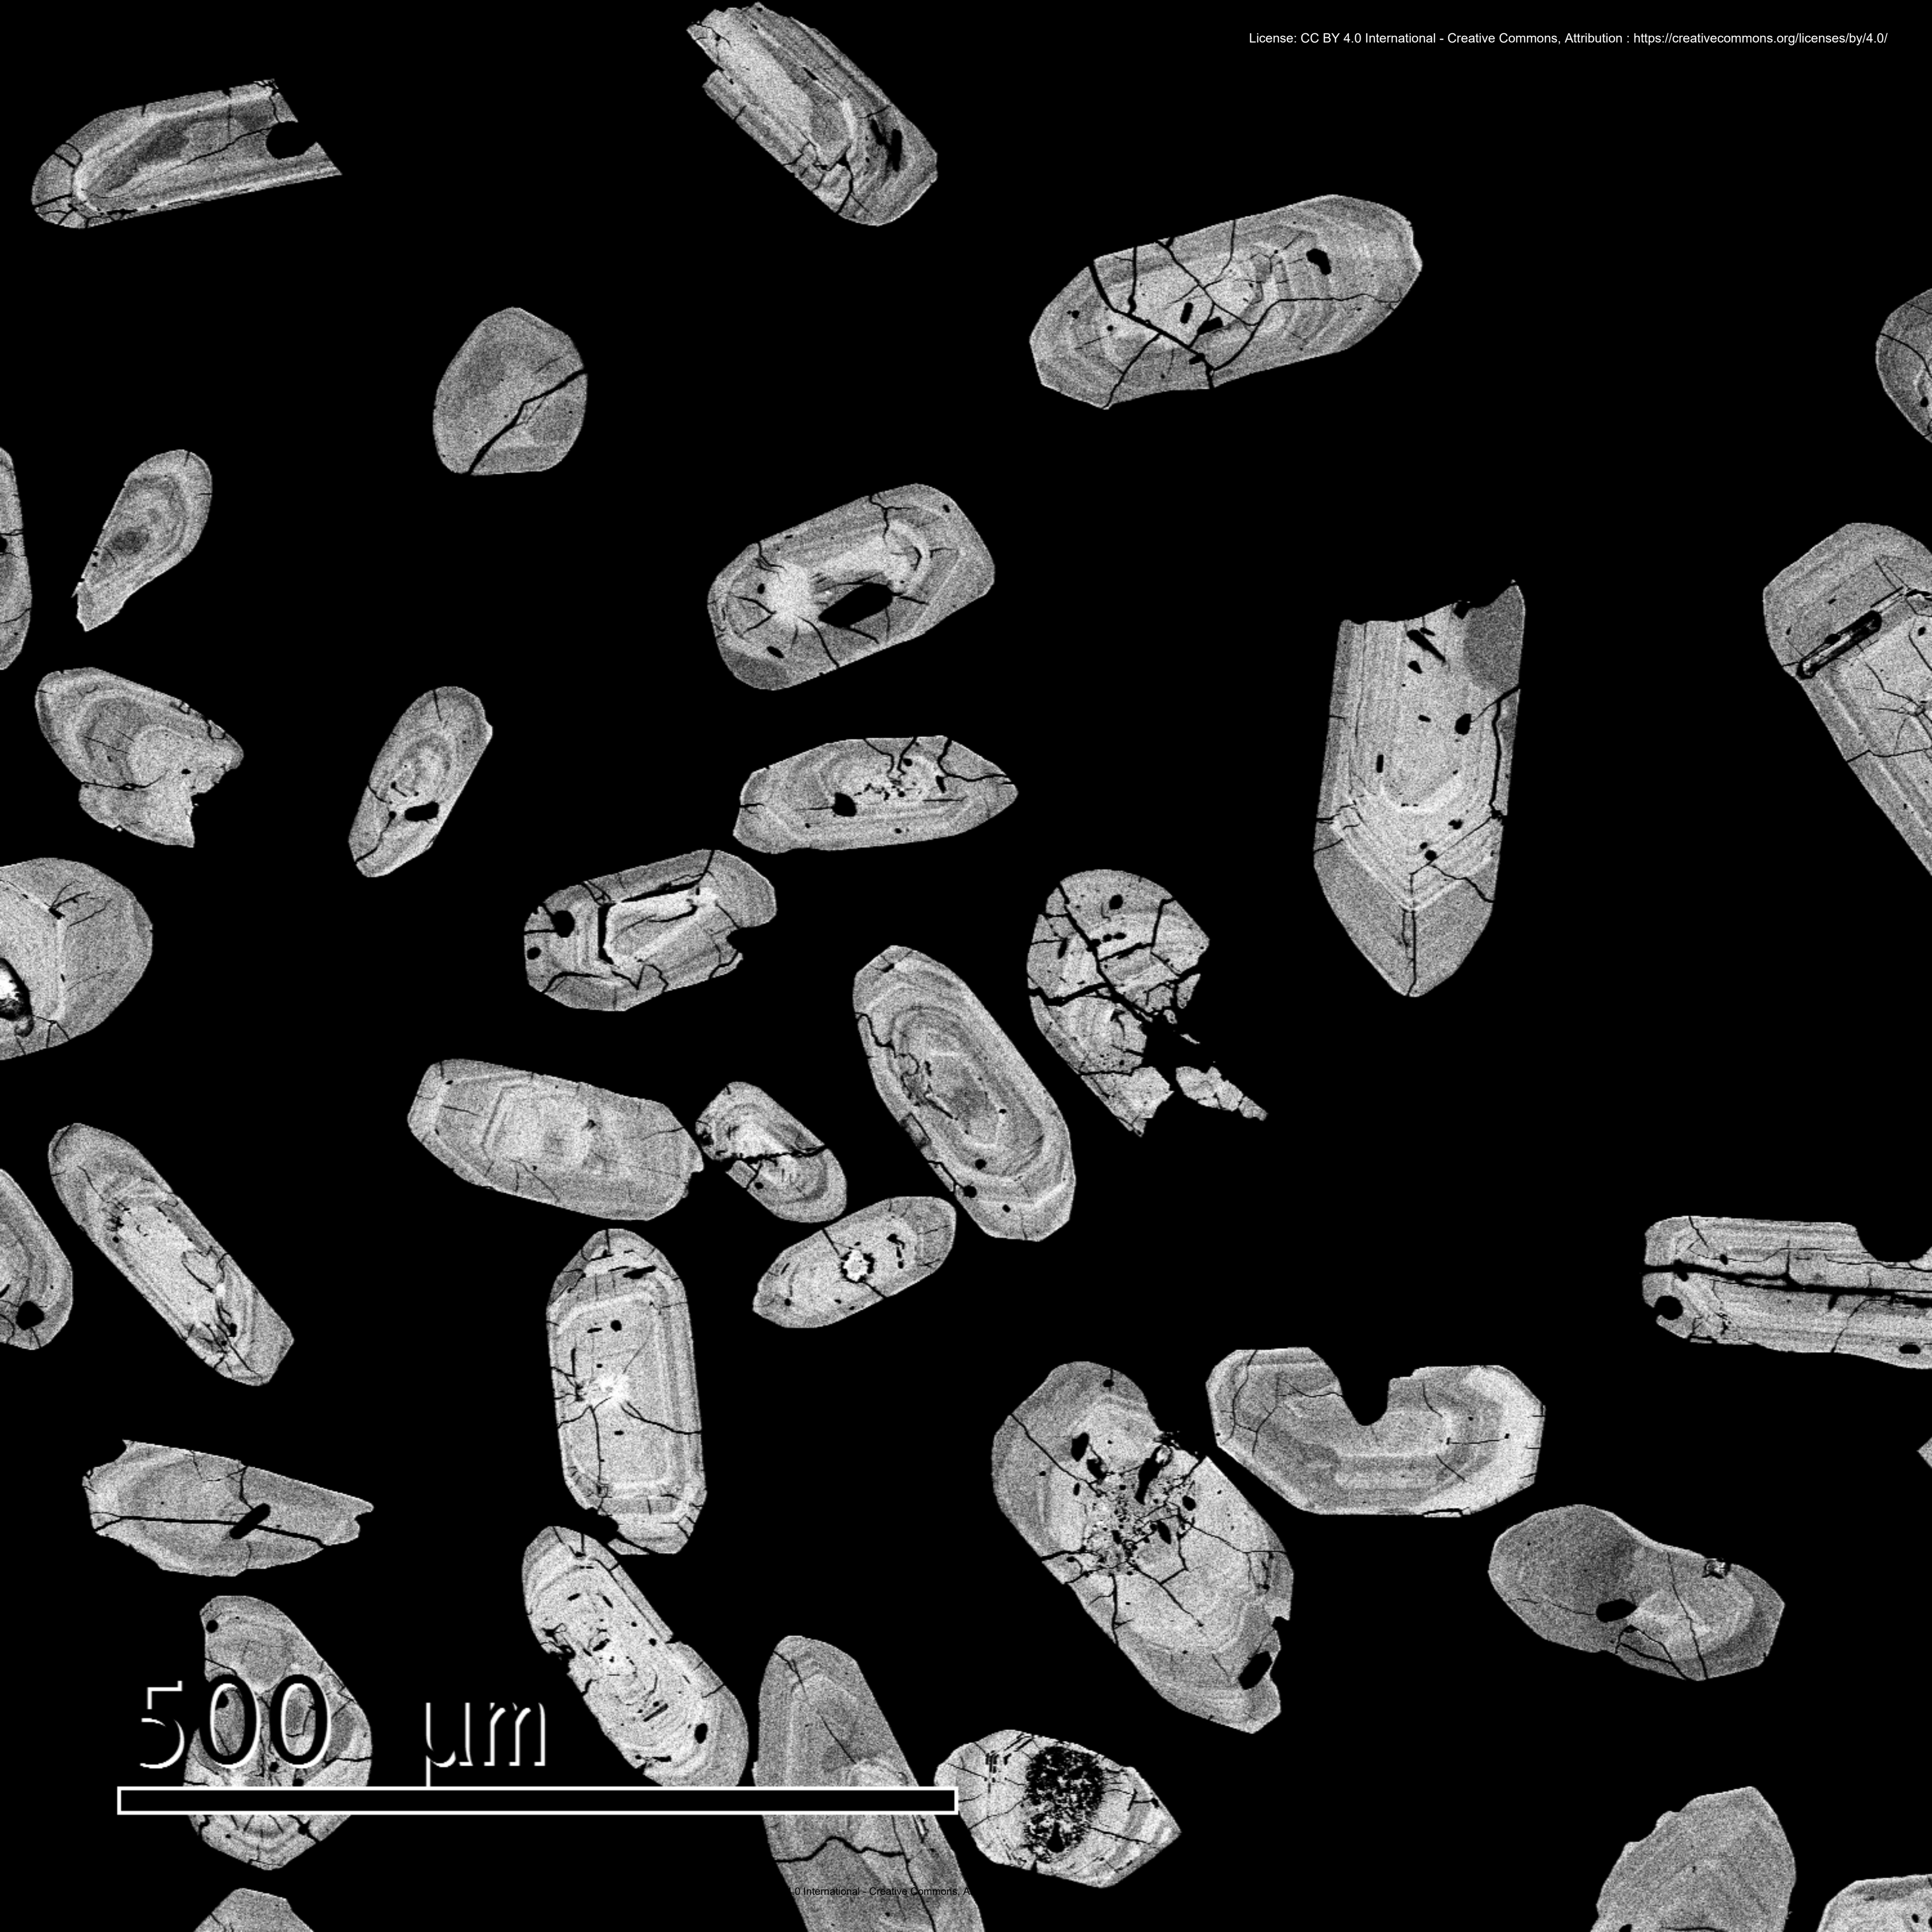

500  $\mu\text{m}$

Supplement: MOESM25 [file 531_2021_2103_MOESM25_ESM.pdf]
